# 1 TRex, a fast multi-animal tracking 2 system with markerless 3 identification, 2D body posture 4 estimation and visual field 5 reconstruction

6 **Tristan Walter**<sup>1,2,3\*</sup> and **Iain D Couzin**<sup>1,2,3\*</sup>

\*For correspondence:

[twalter@ab.mpg.de](mailto:twalter@ab.mpg.de) (TW);  
[icouzin@ab.mpg.de](mailto:icouzin@ab.mpg.de) (IDC)

7 <sup>1</sup>Max Planck Institute of Animal Behavior, Germany; <sup>2</sup>Centre for the Advanced Study of  
8 Collective Behaviour, University of Konstanz, Germany; <sup>3</sup>Department of Biology,  
9 University of Konstanz, Germany

---

11 **Abstract** Automated visual tracking of animals is rapidly becoming an indispensable tool for  
12 the study of behavior. It offers a quantitative methodology by which organisms' sensing and  
13 decision-making can be studied in a wide range of ecological contexts. Despite this, existing  
14 solutions tend to be challenging to deploy in practice, especially when considering long and/or  
15 high-resolution video streams. Here, we present TR<sub>ex</sub>, a fast and easy-to-use solution for tracking  
16 a large number of individuals simultaneously with real-time (60Hz) tracking performance for up  
17 to approximately 256 individuals and estimates 2D body postures and visual fields, both in open-  
18 and closed-loop contexts. Additionally, TR<sub>ex</sub> offers highly-accurate, deep-learning-based visual  
19 identification of up to approximately 100 unmarked individuals, where it is between 2.5-46.7  
20 times faster, and requires 2-10 times less memory, than comparable software (with relative  
21 performance increasing for more organisms and longer videos) and provides interactive  
22 visualization and data-exploration within an intuitive, platform-independent graphical user  
23 interface.

---

## 25 Introduction

26 Tracking multiple moving animals (and multiple objects, generally) is important in various fields of  
27 research such as behavioral studies, ecophysiology, biomechanics, and neuroscience (*Dell et al.*  
28 *(2014)*). Many tracking algorithms have been proposed in recent years (*Ohayon et al. (2013)*, *Fuku-*  
29 *naga et al. (2015)*, *Burgos-Artizzu et al. (2012)*, *Rasch et al. (2016)*), often limited to/only tested with  
30 a particular organism (*Hewitt et al. (2018)*, *Branson et al. (2009)*) or type of organism (e.g. pro-  
31 toists, *Pennekamp et al. (2015)*; fly larvae and worms, *Risse et al. (2017)*). Relatively few have been  
32 tested with a range of organisms and scenarios (*Pérez-Escudero et al. (2014)*, *Sridhar et al. (2019)*,  
33 *Rodriguez et al. (2018)*). Furthermore, many existing tools only have a specialized set of features,  
34 struggle with very long or high-resolution ( $\geq 4K$ ) videos, or simply take too long to yield results. Exist-  
35 ing fast algorithms are often severely limited with respect to the number of individuals that can be  
36 tracked simultaneously; for example xyTracker (*Rasch et al. (2016)*) allows for real-time tracking at  
37 40Hz while accurately maintaining identities, and thus is suitable for closed-loop experimentation

38 (experiments where stimulus presentation can depend on the real-time behaviors of the individ-  
39 uals, e.g. *Bath et al. (2014)*, *Brembs and Heisenberg (2000)*, *Bianco and Engert (2015)*), but has a  
40 limit of being able to track only 5 individuals simultaneously. ToxTrac (*Rodriguez et al. (2018)*), a  
41 software comparable to xyTracker in it's set of features, is limited to 20 individuals and relatively  
42 low frame-rates ( $\leq 25$ fps). Others, while implementing a wide range of features and offering high-  
43 performance tracking, are costly and thus limited in access (*Noldus et al. (2001)*). Perhaps with  
44 the exception of proprietary software, one major problem at present is the severe fragmentation  
45 of features across the various software solutions. For example, experimentalists must typically  
46 construct work-flows from many individual tools: One tool might be responsible for estimating  
47 the animal's positions, another for estimating their posture, another one for reconstructing visual  
48 fields (which in turn probably also estimates animal posture, but does not export it in any way)  
49 and one for keeping identities – correcting results of other tools post-hoc. It can take a very long  
50 time to make them all work effectively together, adding what is often considerable overhead to  
51 behavioral studies.

52 TRex, the software released with this publication (available at [trex.run](https://trex.run) under an Open-Source  
53 license), has been designed to address these problems, and thus to provide a powerful, fast and  
54 easy to use tool that will be of use in a wide range of behavioral studies. It allows users to track  
55 moving objects/animals, as long as there is a way to separate them from the background (e.g.  
56 static backgrounds, custom masks, as discussed below). In addition to the positions of individuals,  
57 our software provides other per-individual metrics such as body shape and, if applicable, head-  
58 /tail-position. This is achieved using a basic posture analysis, which works out of the box for most  
59 organisms, and, if required, can be easily adapted for others. Posture information, which includes  
60 the body center-line, can be useful for detecting e.g. courtship displays and other behaviors that  
61 might not otherwise be obvious from mere positional data. Additionally, with the visual sense  
62 often being one of the most important modalities to consider in behavioral research, we include  
63 the capability for users to obtain a computational reconstruction of the visual fields of all individuals  
64 (*Strandburg-Peshkin et al. 2013*, *Rosenthal et al. 2015*). This not only reveals which individuals are  
65 visible from an individual's point-of-view, as well as the distance to them, but also which parts of  
66 others' bodies are visible.

67 Included in the software package is a task-specific tool, TGrabs, that is employed to pre-process  
68 existing video files and which allows users to record directly from cameras capable of live-streaming  
69 to a computer (with extensible support from generic webcams to high-end machine vision cam-  
70 eras). It supports most of the above-mentioned tracking features (positions, posture, visual field)  
71 and provides access to results immediately while continuing to record/process. This not only saves  
72 time, since tracking results are available immediately after the trial, but makes closed-loop support  
73 possible for large groups of individuals ( $\leq 128$  individuals). TRex and TGrabs are written in C++ but,  
74 as part of our closed-loop support, we are providing a Python-based general scripting interface  
75 which can be fully customized by the user without the need to recompile or relaunch. This inter-  
76 face allows for compatibility with external programs (e.g. for closed-loop stimulus-presentation)  
77 and other custom extensions.

78 The fast tracking described above employs information about the kinematics of each organ-  
79 ism in order to try to maintain their identities. This is very fast and useful in many scenarios, e.g.  
80 where general assessments about group properties (group centroid, alignment of individuals, den-  
81 sity, etc.) are to be made. However, when making conclusions about *individuals* instead, main-  
82 taining identities perfectly throughout the video is a critical requirement. Every tracking method  
83 inevitably makes mistakes, which, for small groups of two or three individuals or short videos, can  
84 be corrected manually – at the expense of spending much more time on analysis, which rapidly  
85 becomes prohibitive as the number of individuals to be tracked increases. To make matters worse,  
86 when multiple individuals stay out of view of the camera for too long (such as if individuals move  
87 out of frame, under a shelter, or occlude one another) there is no way to know who is whom  
88 once they re-emerge. With no baseline truth available (e.g. using physical tags as in *Alarcón-Nieto*

89 *et al. (2018)*, *Nagy et al. (2013)*; or marker-less methods as in *Pérez-Escudero et al. (2014)*, *Romero-*  
90 *Ferrero et al. (2019)*, *Rasch et al. (2016)*), these mistakes can not be corrected and accumulate over  
91 time, until eventually all identities are fully shuffled. To solve this problem (and without the need  
92 to mark, or add physical tags to individuals), TRex can, at the cost of spending more time on analy-  
93 sis (and thus not during live-tracking), automatically learn the identity of up to approximately 100  
94 unmarked individuals based on their visual appearance. This machine-learning based approach,  
95 herein termed *visual identification*, provides an independent source of information on the identity  
96 of individuals, which is used to detect and correct potential tracking mistakes without the need for  
97 human supervision.

98 In this paper, we will describe the most important functions of the software in a typical order  
99 of execution. This is followed by an evaluation of these functions in terms of speed and reliability  
100 using a wide range of experimental systems, including termites, fruit flies, locusts and multiple  
101 species of schooling fish (although we stress that our software is not limited to such species).

102 Specifically regarding the visual identification of unmarked individuals in groups, `idtracker.ai`  
103 is currently state-of-the-art, yielding high-accuracy (>99% in most cases) in maintaining consistent  
104 identity assignments across entire videos (*Romero-Ferrero et al. (2019)*). Similarly to TRex, this is  
105 achieved by training an artificial neural network to visually differentiate between individuals, and  
106 using identity predictions from this network to avoid/correct tracking mistakes. Both approaches  
107 work without human supervision, and are limited to approximately 100 individuals. Given that  
108 `idtracker.ai` is the only currently available tool with visual identification for such large groups of  
109 individuals, and also because of the quality of results, we will use it as a benchmark for our visual  
110 identification system. Results will be compared in terms of both accuracy and computation speed,  
111 showing TRex' ability to achieve the same high level of accuracy but typically at far higher speeds,  
112 and with a much reduced memory requirement.

113 TRex is platform-independent and runs on all major operating systems (Linux, Windows, macOS)  
114 and offers complete batch processing support, allowing users to efficiently process entire sets  
115 of videos without requiring human intervention. All parameters can be accessed either through  
116 settings files, from within the graphical user interface (or *GUI*), or using the command-line. The  
117 user interface supports off-site access using a built-in web-server (although it is recommended to  
118 only use this from within a secure VPN environment). Available parameters are explained in the  
119 documentation directly as part of the GUI and on an external website (see below). Results can be  
120 exported to independent data-containers (NPZ or CSV) for further analyses in software of the user's  
121 choosing. We will not go into detail regarding the many GUI functions since albeit being of great  
122 utility to the researcher, they are only the means to easily apply the features presented herein.  
123 Some examples will be given in the main text and appendix, but a comprehensive collection of all  
124 of them, as well as detailed documentation, is available in the up-to-date online-documentation  
125 which can be found at [trex.run/docs](http://trex.run/docs).

## 126 **Methods**

127 In the following sections we will explore some of the methods implemented in TRex and TGrabs,  
128 as well as their most important features in a typical order of operations (see Figure 2 for a flow  
129 diagram), starting out with a raw video. We will then describe how trajectories are obtained and end  
130 with the most technically involved features. The workflow for using our software is straightforward  
131 and can be summarized in four stages:

- 132 1. **Segmentation** in TGrabs. When recording a video or converting a previously recorded file (e.g.  
133 MP4, .AVI, etc.), it is segmented into background and foreground-objects (`b1obs`). Results are  
134 saved to a custom, non-proprietary video format (`PV`) (Figure 1a).
- 135 2. **Tracking** the video, either directly in TGrabs, or after preprocessing in TRex with access to  
136 customizable visualizations and the ability to change tracking parameters on-the-fly. Here, we  
137 will describe two types of data available within TRex, 2D posture- and visual-field estimation,

- 138 as well as real-time applications of such data (Figure 1b).
- 139 3. We then go into detail on how to train a neural network to perform visual identification of indi-
- 140 viduals, used in the process of **automatic identity correction** (Figure 1c). This step may not
- 141 be necessary in many cases, but it is the only way to guarantee consistent identities through-
- 142 out the video. It is also the most time-consuming step, as well as the only one involving ma-
- 143 chine learning. All previously collected posture- and other tracking-related data are utilized
- 144 in this step, placing it late in a typical workflow.
- 145 4. Data visualization is a critical component of any research project, especially for unfamiliar
- 146 datasets, but manually crafting one for every new experiment can be very time-consuming.
- 147 Thus, TRex offers a universal, highly customizable, way to make all collected data available
- 148 for interactive **exploration** (Figure 1d) – allowing users to change many display options and
- 149 recording video clips for external playback. Tracking parameters can be adjusted on the fly
- 150 (many with visual feedback) – important e.g. when preparing a closed-loop feedback with a
- 151 new species or setup.

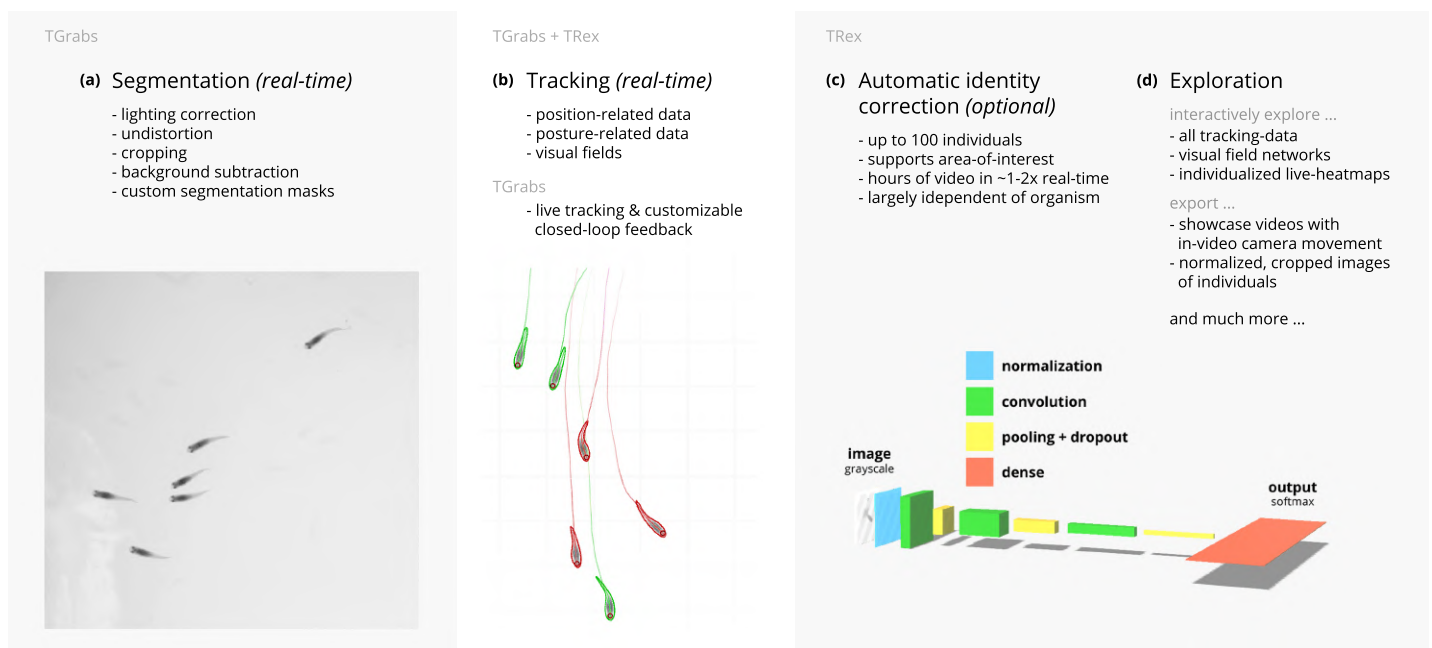

**Figure 1.** Videos are typically processed in four main stages, illustrated here each with a list of prominent features. Some of them are accessible from both TRex and TGabs, while others are software specific (as shown at the very top). (a) The video is either recorded directly with our software (TGabs), or converted from a pre-recorded video file. Live-tracking enables users to perform closed-loop experiments, for which a virtual testing environment is provided. (b) Videos can be tracked and parameters adjusted with visual feedback. Various exploration and data presentation features are provided and customized data streams can be exported for use in external software. (c) After successful tracking, automatic visual identification can, optionally, be used to refine results. An artificial neural network is trained to recognize individuals, helping to automatically correct potential tracking mistakes. In the last stage, many graphical tools are available to users of TRex, a selection of which is listed in (d).

## 152 Segmentation

153 When an image is first received from a camera (or a video file), the objects of interest potentially

154 present in the frame must be detected and cropped out. Several technologies are available to sep-

155 arate the foreground from the background. Various machine learning algorithms are frequently

156 used to great effect, even for the most complex environments (Hughey et al. 2018, Robie et al.

157 2017, Francisco et al. 2019). These more advanced approaches are typically beneficial for the anal-

158 ysis of field-data or organisms that are very hard to see in video (e.g. very transparent or low

159 contrast objects/animals in the scene). However, for most laboratory experiments, simpler (and

160 also much faster), classical image-processing methods yield satisfactory results. More advanced  
161 techniques like luminance equalization, which e.g. is useful when lighting varies between images,  
162 image undistortion, and brightness/contrast adjustments are available in TGrabs – but are costlier  
163 in terms of processing time. Thus, while it is certainly possible to segment objects from the back-  
164 ground using external, e.g. deep-learning based, tools, we provide as a generically-useful capability  
165 *background-subtraction*. This can be used immediately in experiments where there are relatively  
166 static backgrounds. These are generated automatically by uniformly sampling images from the  
167 source video(s) – different modes are available (min/max, mode and mean) for the user to choose  
168 from. Importantly, since many behavioral studies rely on  $\geq 4K$  resolution videos, we heavily utilize  
169 the GPU (if available) to speed up most of the image-processing, allowing TRex to scale well with  
170 increasing image resolution.

171 TRex allows users to track anything as long as either (i) the background is relatively static while  
172 the objects move at least occasionally, (ii) the objects/animals of interest have enough contrast  
173 to the background or (iii) the user provides an additional binary mask per frame which is used to  
174 separate the objects to be tracked from the background, the typical means of doing this being by  
175 deep-learning based segmentation (e.g. *Caelles et al. 2017*). These masks are expected to be in a  
176 video-format themselves and correspond 1:1 in length and dimensions to the video that is to be  
177 analyzed. They are expected to be binary, marking individuals in white and background in black.  
178 Of course, these binary videos could be tracked on their own, but would not retain grey-scale  
179 information. There are a lot of possible applications where this could be useful; but generally,  
180 whenever individuals are really hard to detect visually and need to be recognized by a different  
181 software (e.g. a machine-learning-based detection like *Maninis et al. 2018*). Individual frames can  
182 then be connected using our software as a second step.

183 The detected objects are saved to a custom non-proprietary compressed file format (Prepro-  
184 cessed Video or PV, see appendix *The PV file format*), that stores only the most essential information  
185 from the original video stream: the objects and their pixel positions and values. This format is opti-  
186 mized for quick random index access by the tracking software and stores other meta-information  
187 (like frame timings) utilized during playback or analysis. When recording videos directly from a  
188 camera, they can also be streamed to an additional and independent MP4 container format (plus  
189 information establishing the mapping between PV and MP4 video frames).

## 190 **Tracking**

191 Once animals (or, more generally, termed "objects" henceforth) have been successfully segmented  
192 from the background, we can either use the live-tracking feature in TGrabs or open a preprocessed  
193 file in TRex, to generate the trajectories of these objects. This process uses information regarding  
194 an object's movement (i.e. its kinematics) to follow it across frames, estimating future positions  
195 based on previous velocity and angular speed. It will be referred to as "tracking" in the following  
196 text, and is a required step in all workflows.

197 Note that this approach alone is very fast, but, as will be shown, is subject to error with respect  
198 to maintaining individual identities. If that is required, there is a further step, outlined in *Auto-  
199 matic Visual Identification Based on Machine Learning* below, which can be applied at the cost of  
200 processing speed. First, however, we will discuss the general basis of tracking, which is common  
201 to approaches that do, and do not, require identities to be maintained with high-fidelity. Tracking  
202 can occur for two distinct categories, which are handled slightly differently by our software:

- 203 1. there is a known number of objects
- 204 2. there is an unknown number of objects

205 The first case assumes that the number of tracked objects in a frame cannot exceed a certain  
206 expected number of objects (detected automatically or set by the user). This allows the algorithm  
207 to make stronger assumptions, for example regarding noise, where otherwise "valid" objects (con-  
208 forming to size expectations) are ignored due to their positioning in the scene (e.g. too far away



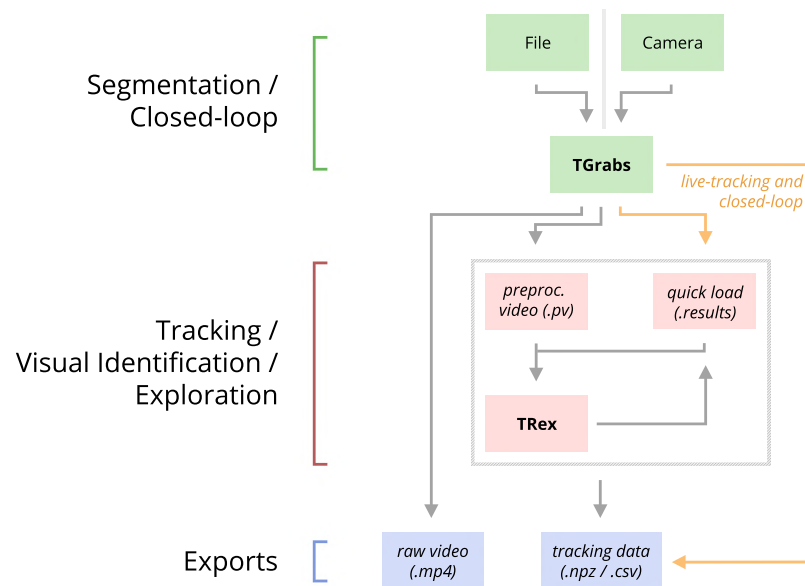

**Figure 2.** An overview of the interconnection between TRex, TGrabs and their data in- and output formats, with titles on the left corresponding to the stages in Figure 1. Starting at the top of the figure, video is either streamed to TGrabs from a file or directly from a compatible camera. At this stage, preprocessed data are saved to a .pv file which can be read by TRex later on. Thanks to its integration with parts of the TRex code, TGrabs can also perform online tracking for limited numbers of individuals, and save results to a .results file (that can be opened by TRex) along with individual tracking data saved to numpy data-containers (.npz), which can be used for analysis in third-party applications. If required, videos recorded directly using TGrabs can also be streamed to a .mp4 video file which can be viewed in commonly available video players like VLC.

209 from previously lost individuals). In the second case, new objects may be generated until all viable  
210 objects in a frame are assigned. While being more susceptible to noise, this is useful for tracking  
211 a large number of objects, where counting objects may not be possible, or where there is a highly  
212 variable number of objects to be tracked.

213 For a given video, our algorithm processes every frame sequentially, extending existing trajec-  
214 tories (if possible) for each of the objects found in the current frame. Every object can only be  
215 assigned to one trajectory, but some objects may not be assigned to any trajectory (e.g. in case the  
216 number of objects exceeds the allowed number of individuals) and some trajectories might not  
217 be assigned to any object (e.g. while objects are out of view). To estimate object identities across  
218 frames we use an approach akin to the popular Kalman filter (Kalman, 1960) which makes pre-  
219 dictions based on multiple noisy data streams (here, positional history and posture information).  
220 In the initial frame, objects are simply assigned from top-left to bottom-right. In all other frames,  
221 assignments are made based on probabilities (see appendix Matching an object to an object in the  
222 next frame) calculated for every combination of object and trajectory. These probabilities repre-  
223 sent the degree to which the program believes that "it makes sense" to extend an existing trajectory  
224 with an object in the current frame, given its position and speed. Our tracking algorithm only con-  
225 sider assignments with probabilities larger than a certain threshold, generally constrained to a  
226 certain proximity around an object assigned in the previous frame.

227 Matching a set of objects in one frame with a set of objects in the next frame is representative  
228 of a typical assignment problem, which can be solved in polynomial time (e.g. using the Hungar-  
229 ian method Kuhn 1955). However, we found that, in practice, the computational complexity of  
230 the Hungarian method can constrain analysis speed to such a degree that we decided to imple-  
231 ment a custom algorithm, which we term tree-based matching, which has a better average-case  
232 performance (see evaluation), even while having a comparatively bad worst-case complexity. Our  
233 algorithm constructs a tree of all possible object/trajectory combinations in the frame and tries to

234 find a compatible (such that no objects/trajectories are assigned twice) set of choices, maximizing  
235 the sum of probabilities amongst these choices (described in detail in the appendix *Matching an*  
236 *object to an object in the next frame*). Problematic are situations where a large number of objects  
237 are in close proximity of one another, since then the number of possible sets of choices grows ex-  
238 ponentially. These situations are avoided by using a mixed approach: tree-based matching is used  
239 most of the time, but as soon as the combinatorial complexity of a certain situation becomes too  
240 great, our software falls back on using the Hungarian method. If videos are known to be prob-  
241 lematic throughout (e.g. with >100 individuals consistently very close to each other), the user may  
242 choose to use an approximate method instead (described in the appendix *section 4*), which simply  
243 iterates through all objects and assigns each to the trajectory for which it has the highest proba-  
244 bility and subsequently does not consider whether another object has an even higher probability  
245 for that trajectory. While the approximate method scales better with an increasing number of in-  
246 dividuals, it is "wrong" (seeing as it does not consider all possible combinations) – which is why it is  
247 not recommended unless strictly necessary. However, since it does not consider all combinations,  
248 making it more sensitive to parameter choice, it scales better for very large numbers of objects  
249 and produces results good enough for it to be useful in very large groups (see appendix *Table A2*).

250 Situations where objects/individuals are touching, partly overlapping, or even completely over-  
251 lapping, is an issue that all tracking solutions have to deal with in some way. The first problem is the  
252 *detection* of such an overlap/crossing, the second is its *resolution*. *idtracker.ai*, for example, deals  
253 only with the first problem: It trains a neural network to detect crossings and essentially ignores  
254 the involved individuals until the problem is resolved by movement of the individuals themselves.  
255 However, using such an image-based approach can never be fully independent of the species or  
256 even video (it has to be retrained for each specific experiment) while also being time-costly to use.  
257 In some cases the size of objects might indicate that they contain multiple overlapping objects,  
258 while other cases might not allow for such an easy distinction – e.g. when sexually dimorphic ani-  
259 mals (or multiple species) are present at the same time. We propose a method, similar to *xyTracker*  
260 in that it uses the object's movement history to detect overlaps. If there are fewer objects in a re-  
261 gion than would be expected by looking at previous frames, an attempt is made to split the biggest  
262 ones in that area. The size of that area is estimated using the maximal speed objects are allowed to  
263 travel per frame (parameter, see documentation *track\_max\_speed*). This, of course, requires rela-  
264 tively good predictions or, alternatively, high frame-rates relative to the object's movement speeds  
265 (which are likely necessary anyway to observe behavior at the appropriate time-scales).

266 By default, objects suspected to contain overlapping individuals are split by thresholding their  
267 background-difference image (see appendix *section 11*), continuously increasing the threshold un-  
268 til the expected number (or more) similarly sized objects are found. Greyscale values and, more  
269 generally, the shading of three-dimensional objects and animals often produces a natural gradi-  
270 ent (see for example Figure 4) making this process surprisingly effective for many of the species  
271 we tested with. Even when there is almost no visible gradient and thresholding produces holes in-  
272 side objects, objects are still successfully separated with this approach. Missing pixels from inside  
273 the objects can even be regenerated afterwards. The algorithm fails, however, if the remaining  
274 objects are too small or are too different in size, in which case the overlapping objects will not be  
275 assigned to any trajectory until all involved objects are found again separately in a later frame.

276 After an object is assigned to a specific trajectory, two kinds of data (posture and visual-fields)  
277 are calculated and made available to the user, which will each be described in one of the follow-  
278 ing subsections. In the last subsection, we outline how these can be utilized in real-time tracking  
279 situations.

## 280 Posture Analysis

281 Groups of animals are often modeled as systems of simple particles (*Inada and Kawachi 2002, Cav-*  
282 *agna et al. 2010, Pérez-Escudero and de Polavieja 2011*), a reasonable simplification which helps  
283 to formalize/predict behavior. However, intricate behaviors, like courtship displays, can only be

284 fully observed once the body shape and orientation are considered (e.g. using tools such as Deep-  
285 PoseKit, *Graving et al. 2019*, and DeepLabCut, *Mathis et al. 2018*). TRex does not track individual  
286 body parts apart from the head and tail (where applicable), but even the included simple and fast  
287 2D posture estimator already allows for deductions to be made about how an animal is positioned  
288 in space, bent and oriented – crucial e.g. when trying to estimate the position of eyes/antennae  
289 as part of an analysis, where this is required (e.g. *Strandburg-Peshkin et al. 2013*, *Rosenthal et al.*  
290 *2015*).

291 In TRex, the 2D posture of an animal consists of (i) an outline around the outer edge of a blob,  
292 (ii) a center-line (or midline for short) that curves with the body and (iii) positions on the outline that  
293 represent the front and rear of the animal (typically head and tail). Our only assumptions here are  
294 that the animal is bilateral with a mirror-axis through its center and that it has a beginning and an  
295 end, and that the camera-view is roughly perpendicular to this axis. This is true for most animals,  
296 but may not hold e.g. for jellyfish (with radial symmetry) or animals with different symmetries (e.g.  
297 radiolaria (protozoa) with spherical symmetry). Still, as long as the animal is not exactly circular  
298 from the perspective of the camera, the midline will follow its longest axis and a posture can be  
299 estimated successfully. The algorithm implemented in our software is run for every (cropped out)  
300 image of an individual and processes it as follows:

301 i. A tree-based approach follows edge pixels around an object in a clock-wise manner. Drawing  
302 the line *around* pixels, as implemented here, instead of through their centers, as done in compa-  
303 rable approaches, helps with very small objects (e.g. one single pixel would still be represented as  
304 a valid outline, instead of a single point).

305 ii. The pointiest end of the outline is assumed, by default, to be either the tail or the head  
306 (based on curvature and area between the outline points in question). Assignment of head vs. tail  
307 can be set by the user, seeing as some animals might have "pointier" heads than tails (e.g. termite  
308 workers, one of the examples we employ). Posture data coming directly from an image can be very  
309 noisy, which is why the program offers options to simplify outline shapes using an Elliptical Fourier  
310 Transform (EFT, see *Iwata et al. 2015*, *Kuhl and Giardina 1982*) or smoothing via a simple weighted  
311 average across points of the curve (inspired by common subdivision techniques, see *Warren and*  
312 *Weimer 2001*). The EFT allows for the user to set the desired level of approximation detail (via the  
313 number of elliptic fourier descriptors, EFDs) and thus make it "rounder" and less jittery. Using an  
314 EFT with just two descriptors is equivalent to fitting an ellipse to the animal's shape (as, for example,  
315 xyTracker does), which is the simplest supported representation of an animal's body.

316 iii. The reference-point chosen in (ii) marks the start for the midline-algorithm. It walks both left  
317 and right from this point, always trying to move approximately the same distance on the outline  
318 (with limited wiggle-room), while at the same time minimizing the distance from the left to the right  
319 point. This works well for most shapes and also automatically yields distances between a midline  
320 point and its corresponding two points on the outline, estimating thickness of this object's body at  
321 this point.

322 Compared to the tracking itself, posture estimation is a time-consuming process and can be  
323 disabled. It is, however, required to estimate – and subsequently normalize – an animal's orienta-  
324 tion in space (e.g. required later in Automatic Visual Identification Based on Machine Learning), or  
325 to reconstruct their visual field as described in the following sub-section.

### 326 Reconstructing 2D Visual Fields

327 Visual input is an important modality for many species (e.g. fish *Strandburg-Peshkin et al. 2013*,  
328 *Bilotta and Saszik 2001* and humans *Colavita 1974*). Due to its importance in widely used model or-  
329 ganisms like zebrafish (*Danio rerio*), we decided to include the capability to conduct a 2-dimensional  
330 reconstruction of each individual's visual field as part of the software. The requirements for this  
331 are successful posture estimation and that individuals are viewed from above, as is usually the  
332 case in laboratory studies.

333 The algorithm makes use of the fact that outlines have already been calculated during posture



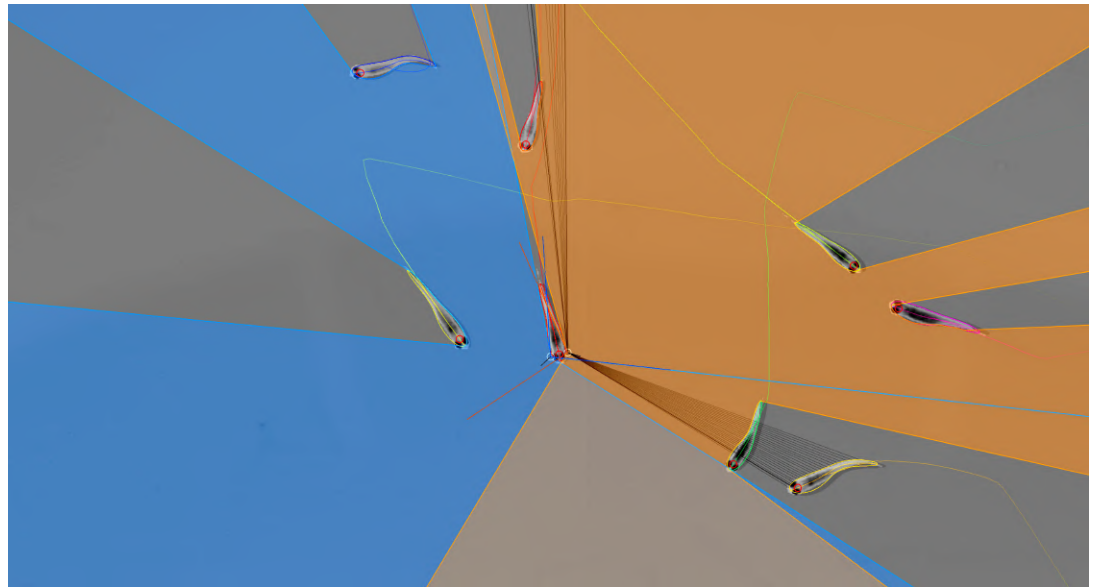

**Figure 3.** Visual field estimate of the individual in the center (zoomed in, the individuals in this image are approximately 2-3cm long). Right (blue) and left (orange) fields of view intersect in the binocular region in the bottom-center. Most individuals can be seen directly by the focal individual, which has a wide field of view of  $260^\circ$  per eye. The yellow individual on the bottom-right is not detected by the focal individual directly (visualized by grey lines here). However, these second-order intersections are saved and accessible through a separate layer in the exported data.

334 estimation. Eye positions are estimated to be evenly distanced from the "snout" and will be spaced  
335 apart depending on the thickness of the body at that point (the distance is based on a ratio, relative  
336 to body-size, which can be adjusted by the user). Eye orientation is also adjustable, which influ-  
337 ences the size of the stereoscopic part of the visual field. We then use ray-casting to intersect rays  
338 from each of the eyes with all other individuals as well as the focal individual itself (self-occlusion).  
339 Individuals not detected in the current frame are approximated using the last available posture.  
340 Data are organized as a multi-layered 1D-image of fixed size for each frame, with each image pre-  
341 representing angles from  $-180^\circ$  to  $180^\circ$  for the given frame. Simulating a limited field-of-view would  
342 thus be as simple as cropping parts of these images off the left and right sides. The different layers  
343 per pixel encode:

- 344 1. identity of the occluder
- 345 2. distance to the occluder
- 346 3. body-part that was hit (distance from the head on the outline in percent)

347 While the individuals viewed from above on a computer screen look 2-dimensional, one major  
348 disadvantage of any 2D approach is, of course, that it is merely a projection of the 3D scene. Any  
349 visual field estimator has to assume that, from an individual's perspective, other individuals act  
350 as an occluder in all instances (see Figure 3). This may only be partly true in the real world, de-  
351 pending on the experimental design, as other individuals may be able to move slightly below, or  
352 above, the focal individuals line-of-sight, revealing otherwise occluded conspecifics behind them.  
353 We therefore support multiple occlusion-layers, allowing second-order and  $N$ th-order occlusions  
354 to be calculated for each individual.

### 355 Realtime Tracking Option for Closed-Loop Experiments

356 Live tracking is supported, as an option to the user, during the recording, or conversion, of a video  
357 in TGrabs. When closed-loop feedback is enabled, TGrabs focusses on maintaining stable recording  
358 frame-rates and may not track recorded frames if tracking takes too long. This is done to ensure

359 that the recorded file can later be tracked again in full/with higher accuracy (thus no information is  
360 lost) if required, and to help the closed-loop feedback to stay synchronized with real-world events.  
361 During development we worked with a mid-range gaming computer and Basler cameras at 90fps  
362 and 2048<sup>2</sup>px resolution, where drawbacks did not occur. Running the program on computers with  
363 outdated or very low-end hardware may, however, affect frame-rates.

364 TRex loads a prepared Python script, handing down an array of data per individual in every  
365 frame. Which data fields are being generated and sent to the script is selected by the script. Avail-  
366 able fields are:

- 367 • Position
- 368 • Midline information
- 369 • Visual field

370 If the script (or the tracking itself) takes too long to execute each frame, more frames are  
371 dropped until a stable frame rate can be achieved. This scales well for all computer-systems, but  
372 may, with significantly decreasing frame-rates (such as if run on very outdated hardware), result in  
373 very fragmented data and worse identity assignment. When the program terminates, the tracked  
374 individual's data are exported - along with a `results` file that can be loaded by the `tracker` at a  
375 later time.

376 In order to make this interface easy to use for prototyping and to debug experiments, the script  
377 may be changed during its run-time and will be reloaded if necessary. Errors in the Python code  
378 lead to a temporary pause of the closed-loop part of the program (not the recording) until all errors  
379 have been fixed.

380 Additionally, thanks to Python being a fully-featured scripting language, it is also possible to  
381 call and send information to other programs during real-time tracking. Communication with other  
382 external programs may be necessary whenever easy-to-use Python interfaces are not available for  
383 e.g. hardware being used by the experimenter.

### 384 **Automatic Visual Identification Based on Machine Learning**

385 Tracking, when it is only based on individual's positional history, can be very accurate under good  
386 circumstances and is currently the fastest way to analyse video recordings or to perform closed-  
387 loop experiments. However, such tracking methods simply do not have access to enough informa-  
388 tion to allow them to ensure identities are maintained for the duration of most entire trials - small  
389 mistakes can and will happen. There are cases, e.g. when studying polarity (only based on short  
390 trajectory segments), or other general group-level assessments, where this is acceptable and iden-  
391 tities do not have to be maintained perfectly. However, consistent identities are required in many  
392 individual-level assessments, and with no baseline truth available to correct mistakes, errors start  
393 accumulating until eventually all identities are fully shuffled. Even a hypothetical, *perfect* tracking  
394 algorithm will not be able to yield correct results in all situations as multiple individuals might go  
395 out of view at the same time (e.g. hiding under cover or just occluded by other animals). There is  
396 no way to tell who is whom, once they re-emerge.

397 The only way to solve this problem is by providing an independent source of information from  
398 which to infer identity of individuals, which is of course a principle we make use of all the time  
399 in our everyday lives: Facial identification of con-specifics is something that comes easily to most  
400 of us, to an extent where we sometimes recognize face-like features where there aren't any. Our  
401 natural tendency to find patterns enables us to train experts on recognizing differences between  
402 animals, even when they belong to a completely different taxonomic order. Tracking individuals is  
403 a demanding task, especially with large numbers of moving animals (*Liu et al. 2009* shows humans  
404 to be effective for up to 4 objects). Human observers are able to solve simple memory recall tasks  
405 for 39 objects at only 92% correct (see *Humphrey and Khan 1992*), where the presented objects  
406 do not even have to be identified individually (just classified as old/new) and contain more inher-  
407 ent variation than most con-specific animals would. Even with this being true, human observers

408 are still the most efficient solution in some cases (e.g. for long-lived animals in complex habitats).  
409 Enhancing visual inter-individual differences by attaching physical tags is an effective way to make  
410 the task easier and more straight-forward to automate. RFID tags are great at maintaining iden-  
411 tities and useful in many situations, but are also limited since individuals have to be in very close  
412 proximity to a sensor in order to be detected (**Bonter and Bridge, 2011**). Attaching QR codes to  
413 animals allows for a very large number of individuals to be uniquely identified at the same time  
414 (**Mersch et al. 2013, Crall et al. 2015** theoretically up to 7000) – and over greater distance than RFID  
415 tags. Generating codes can also be automated, generating tags with optimal visual inter-marker  
416 distances (**Garrido-Jurado et al., 2016**), making it feasible to identify a large number of individuals  
417 with minimal tracking mistakes.

418 While physical tagging is often an effective method by which to identify individuals, it requires  
419 animals to be caught and manipulated, which can be difficult (**Mersch et al., 2013**) and is subject to  
420 the physical limitations of the respective system. Tags have to be large enough so a program can  
421 recognize it in a video stream. Even worse, especially with increased relative tag-size, the animal's  
422 behavior may be affected by the presence of the tag, and there might be no way for experimenters  
423 to necessarily know that it did. In addition, for some animals, like fish and termites, attachment of  
424 tags that are effective for discriminating among a large number of individuals can be problematic  
425 or impossible.

426 Recognizing such issues, (**Pérez-Escudero et al., 2014**) first proposed an algorithm termed *idtracker*,  
427 generalizing the process of pattern recognition for a range of different species. Training an expert  
428 program to tell individuals apart, by detecting slight differences in patterning on their bodies, al-  
429 lows the correction of identities without any human involvement. Even while being limited to about  
430 15 individuals per group, this was a very promising approach. It became much improved upon only  
431 a few years later by the same group in their software *idtracker.ai* (**Romero-Ferrero et al., 2019**),  
432 implementing a paradigm shift from explicit, hard-coded, color-difference detection to using more  
433 general machine learning methods instead – increasing the supported group size by an order of  
434 magnitude.

435 We employ a method for visual identification in *TRex* that is similar to the one used in *idtracker.ai*,  
436 where a neural network is trained to visually recognize individuals and is used to correct tracking  
437 mistakes automatically, without human intervention – the network layout (see Figure 1c) is almost  
438 the same as well (differing only by the addition of a pre-processing layer and using 2D- instead  
439 of 1D-dropout layers). However, in *TRex*, processing speed and chances of success are improved  
440 (the former being greatly improved) by (i) minimizing the variance landscape of the problem and  
441 (ii) exploring the landscape to our best ability, optimally covering all poses and lighting-conditions  
442 an individual can be in, as well as (iii) shortening the training duration by significantly altering the  
443 training process – e.g. choosing new samples more adaptively and using different stopping-criteria  
444 (accuracy, as well as speed, are part of the later evaluation).

445 While *Tracking* already *tries* to (within each trajectory) consistently follow the same individual,  
446 there is no way to ensure/check the validity of this process without providing independent identity  
447 information. Generating this source of information, based on the visual appearance of individu-  
448 als, is what the algorithm for visual identification, described in the following subsections, aims to  
449 achieve. Re-stated simply, the goal of using automatic visual identification is to obtain reliable pre-  
450 dictions of the identities of all (or most) objects in each frame. Assuming these predictions are of  
451 sufficient quality, they can be used to detect and correct potential mistakes made during *Tracking*  
452 by looking for identity switches within trajectories. Ensuring that predicted identities within trajec-  
453 tories are consistent, by proxy, also ensures that each trajectory is consistently associated with a  
454 single, real individual. In the following, before describing the four stages of that algorithm, we will  
455 point out key aspects of how tracking/image data are processed and how we addressed the points  
456 (i)-(iii) above and especially highlight the features that ultimately improved performance compared  
457 to other solutions.

## 458 Preparing Tracking-Data

459 Visual identification starts out only with the trajectories that the Tracking provides. Tracking, on its  
460 own, is already an improvement over other solutions, especially since (unlike e.g. `idtracker.ai`)  
461 TRex makes an effort to separate overlapping objects (see the Algorithm for splitting touching indi-  
462 viduals) and thus is able to keep track of individuals for longer (see appendix Figure A2). Here, we  
463 – quite conservatively – assume that, after every problematic situation (defined in the list below),  
464 the assignments made by our tracking algorithm are wrong. Whenever a problematic situation is  
465 encountered as part of a trajectory, we split the trajectory at that point. This way, all trajectories  
466 of all individuals in a video become an assortment of trajectory snippets (termed "segments" from  
467 here on), which are clear of problematic situations, and for each of which the goal is to find the  
468 correct identity ("correct" meaning that identities are consistently assigned to the same *real* indi-  
469 vidual throughout the video). Situations are considered "problematic", and cause the trajectory to  
470 be split, when:

- 471 • **The individual has been lost for at least one frame.** For example when individuals are  
472 moving unexpectedly fast, are occluded by other individuals/the environment, or simply not  
473 present anymore (e.g. eaten).
- 474 • **Uncertainty of assignment was too high (> 50%)** e.g. due to very high movement speeds  
475 or extreme variation in size between frames. With simpler tracking tasks in mind, these seg-  
476 ments are kept as *connected* tracks, but regarded as separate ones here.
- 477 • **Timestamps suggest skipped frames.** Missing frames in the video may cause wrong as-  
478 signments and are thus treated as if the individuals have been lost. This distinction can only  
479 be made if accurate frame timings are available (when recording using TGrabs or provided  
480 alongside the video files in separate `npz` files).

481 Unless one of the above conditions becomes true, a segment is assumed to be consecutive  
482 and connected; that is, throughout the whole segment, no mistakes have been made that lead to  
483 identities being switched. Frames where all individuals are currently within one such segment at  
484 the same time will henceforth be termed *global segments*.

485 Since we know that there are no problematic situations inside each per-individual segment, and  
486 thus also not across individuals within the range of a global segment, we can choose any global  
487 segment as a basis for an initial, arbitrary assignment of identities to trajectories. One of the most  
488 important steps of the identification algorithm then becomes deciding which global segment is  
489 the best starting point for the training. If a mistake is made here, consecutive predictions for other  
490 segments will fail and/or produce unreliable results in general.

491 Only a limited set of global segments is kept – striking a balance between respecting user-given  
492 constraints and capturing as much of the variance as possible. In many of the videos used for  
493 evaluation, we found that only few segments had to be considered – however, computation time  
494 is ultimately bounded by reducing the number of qualifying segments. While this is true, it is also  
495 beneficial to avoid auto-correlation by incorporating samples from all sections of the video instead  
496 of only sourcing them from a small portion – to help achieve a balance, global segments are binned  
497 by their middle frame into four bins (each quarter of the video being a bin) and then reducing the  
498 number of segments inside each bin. With that goal in mind, we sort the segments within bins by  
499 their "quality" – a combination of two factors:

- 500 1. To capture as much as possible the variation due to an individual's own movement, as well as  
501 within the background that it moves across, a "good" segment should be a segment where  
502 all individuals move as much as possible and also travel as large a distance as possible. Thus,  
503 we derive a per-individual *spatial coverage descriptor* for the given segment by dissecting the  
504 arena (virtually) into a grid of equally sized, rectangular "cells" (depending on the aspect ratio  
505 of the video). Each time an individual's center-point moves from one cell to the next, a counter  
506 is incremented for that individual. To avoid situations where, for example, all individuals but

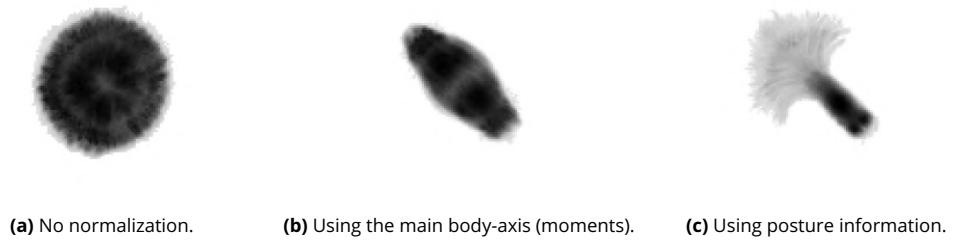

**Figure 4.** Comparison of different normalization methods. Images all stem from the same video and belong to the same identity. The video has previously been automatically corrected using the visual identification. Each object visible here consists of  $N$  images  $M_i, i \in [0, N]$  that have been accumulated into a single image using  $\min_{i \in [0, N]} M_i$ , with min being the element-wise minimum across images. The columns represent same samples from the same frames, but normalized in three different ways: In (a), images have not been normalized at all. Images in (b) have been normalized by aligning the objects along their main axis (calculated using *image-moments*), which only gives the axis within 0 to 180 degrees. In (c), all images have been aligned using posture information generated during the tracking process. As the images become more and more recognizable to *us* from left to right, the same applies to a network trying to tell identities apart: Reducing noise in the data speeds up the learning process.

507 one are moving, we only use the lowest per-individual spatial coverage value to represent a  
508 given segment.

509 2. It is beneficial to have more examples for the network to learn from. Thus, as a second sorting  
510 criterion, we use the average number of samples per individual.

511 After being sorted according to these two metrics, the list of segments per bin is reduced, ac-  
512 cording to a user-defined variable (4 by default), leaving only the most viable options per quarter  
513 of video.

514 The number of visited cells may, at first, appear to be essentially equivalent to a spatially nor-  
515 malized *distance travelled* (as used in `idtracker.ai`). In edge cases, where individuals never stop  
516 or always stop, both metrics can be very similar. However, one can imagine an individual continu-  
517 ously moving around in the same corner of the arena, which would be counted as an equally good  
518 segment for that individual as if it had traversed the whole arena (and thus capturing all variable en-  
519 vironmental factors). In most cases, using highly restricted movement for training is problematic,  
520 and worse than using a shorter segment of the individual moving diagonally through the entire  
521 space, since the latter captures more of the variation within background, lighting conditions and  
522 the animals movement in the process.

### 523 Minimizing the Variance Landscape by Normalizing Samples

524 A big strength of machine learning approaches is their resistance to noise in the data. Generally,  
525 any machine learning method will likely still converge - even with noisy data. Eliminating unnec-  
526 essary noise and degrees of freedom in the dataset, however, will typically help the network to  
527 converge much more quickly: Tasks that are easier to solve will of course also be solved more ac-  
528 curately within similar or smaller timescales. This is due to the optimizer not having to consider  
529 various parts of the possible parameter-space during training, or, put differently, shrinking the  
530 overall parameter-space to the smallest possible size without losing important information. The  
531 simplest such optimization included in most tracking and visual identification approaches is to seg-  
532 ment out the objects and centering the individuals in the cropped out images. This means that (i)  
533 the network does not have to consider the whole image, (ii) needs only to consider one individual  
534 at a time and (iii) the corners of the image can most likely be neglected.

535 Further improving on this, approaches like `idtracker.ai` align all objects along their most-  
536 elongated axis, essentially removing global orientation as a degree of freedom. The orientation of  
537 an arbitrary object can be calculated e.g. using an approach often referred to as *image-moments*



538 (*Hu, 1962*), yielding an angle within  $[0 - 180]^\circ$ . Of course, this means that

- 539 1. circular objects have a random (noisy) orientation
- 540 2. elongated objects (e.g. fish) can be either head-first or flipped by  $180^\circ$  and there is no way to
- 541 discriminate between those two cases (see second row, Figure 4)
- 542 3. a C-shaped body deformation, for example, results in a slightly bent axis, meaning that the
- 543 head will not be in exactly the same position as with a straight posture of the animal.

544 Each of these issues adds to the things the network has to learn to account for, widening the

545 parameter-space to be searched and increasing computation time. However, barring the first point,

546 each problem can be tackled using the already available posture information. Knowing head and

547 tail positions and points along the individual's center-line, the individual's heads can be locked

548 roughly into a single position. This leaves room only for their rear end to move, reducing variation

549 in the data to a minimum (see Figure 4). In addition to faster convergence, this also results in better

550 generalization right from the start and even with a smaller number of samples per individual (see

551 Figure 7).

### 552 Guiding the Training Process

553 Per batch, the stochastic gradient descent is directed by the local accuracy (a fraction of correct/total

554 predictions), which is a simple and commonly used metric that has no prior knowledge of where

555 the samples within a batch come from. This has the desirable consequence that no knowledge

556 about the temporal arrangement of images is necessary in order to train and, more importantly,

557 to apply the network later on.

558 In order to achieve accurate results quickly across batches, while at the same time making it pos-

559 sible to indicate to the user potentially problematic sequences within the video, we devised a metric

560 that can be used to estimate local as well as global training quality: We term this uniqueness and

561 it combines information about objects within a frame, following the principle of non-duplication;

562 images of individuals within the same frame are required to be assigned different identities by the

563 networks predictions.

562 The program generates image data for evenly spaced frames across the entire video. All images

563 of tracked individuals within the selected frames are, after every epoch of the training, passed on

564 to the network. It returns a vector of probabilities  $p_{ij}$  for each image  $i$  to be identity  $j \in [0, N]$ , with

565  $N$  being the number of individuals. Based on these probabilities, uniqueness can be calculated as

566 in Box 1, evenly covering the entire video. The magnitude of this probability vector per image is

567 taken into account, rewarding strong predictions of  $\max_j \{p_{ij}\} = 1$  and punishing weak predictions

568 of  $\max_j \{p_{ij}\} < 1$ .

569 Uniqueness is not integrated as part of the loss function, but it is used as a global gradient

570 before and after each training unit in order to detect global improvements. Based on the average

571 uniqueness calculated before and after a training unit, we can determine whether to stop the train-

572 ing, or whether training on the current segment made our results worse (faulty data). If uniqueness

573 is consistently high throughout the video, then training has been successful and we may terminate

574 early. Otherwise, valleys in the uniqueness curve indicate bad generalization and thus currently

575 missing information regarding some of the individuals. In order to detect problematic sections of

576 the video we search for values below  $1 - \frac{0.5}{N}$ , meaning that the section potentially contains new

577 information we should be adding to our training data. Using accuracy per-batch and then using

578 uniqueness to determine global progress, we get the best of both worlds: A context-free prediction

579 method that is trained on global segments that are strategically selected by utilizing local context

600 information.

601 The closest example of such a procedure in `idtracker.ai` is the termination criterion after

602 *protocol 1*, which states that individual segments have to be consistent and certain enough in all

603 global segments in order to stop iterating. While this seems to be similar at first, the way accu-

604 racy is calculated and the terminology here are quite different: (i) Every metric in `idtracker.ai`'s

## 565 **Box 1. Calculating uniqueness for a frame**

566 **Data:** frame  $x$

567 **Result:** Uniqueness score for frame  $x$

568  $uids = \text{map}\{\}$

569  $\hat{p}(i | b)$  is the probability of blob  $b$  to be identity  $i$

570  $f(x)$  returns a list of the tracked objects in frame  $x$

571  $E(v) = (1 + \exp(-\pi)) / (1 + \exp(-\pi v))$  is a shift of roughly +0.5 and non-linear scaling of  
572 values  $0 \leq v \leq 1$

573

574 **foreach** *object*  $b \in f(x)$  **do**

575 |  $\text{maxid} = \arg \max_i \hat{p}(i | b)$  with  $i \in \text{identities}$

581 576 **if**  $\text{maxid} \in uids$  **then**

|  $uids[\text{maxid}] = \max(uids[\text{maxid}], \hat{p}(\text{maxid}, b))$

577 **else**

|  $uids[\text{maxid}] = \hat{p}(\text{maxid}, b)$

578 **end**

579 **end**

580 **return**  $|uids|^{-1} |f(x)| * E(|uids|^{-1} (\sum_{i \in uids} uids[i]))$

**Algorithm 1:** The algorithm used to calculate the uniqueness score for an individual frame.

Probabilities  $\hat{p}(i | b)$  are predictions by the pre-trained network. During the accumulation these predictions will gradually improve proportional to the global training quality. Multiplying the unique percentage  $|uids|^{-1} |f(x)|$  by the (scaled) mean probability deals with cases of low accuracy, where individuals switch every frame (but uniquely).

605 final assessment after *protocol 1* is calculated at segment-level, not utilizing per-frame information.  
606 *Uniqueness* works per-frame, not per segment, and considers individual frames to be entirely inde-  
607 pendent from each other. It can be considered a much stronger constraint set upon the network's  
608 predictive ability, seeing as it basically counts the number of times mistakes are estimated to have  
609 happened within single frames. Averaging only happens *afterwards*. (ii) The terminology of iden-  
610 tities being unique is only used in `idtracker.ai` once after *protocol 1* and essentially as a binary  
611 value, not recognizing its potential as a descendable gradient. Images are simply added until a  
612 certain percentage of images has been reached, at which point accumulation is terminated. (iii)  
613 Testing uniqueness is much faster than testing network accuracy across segments, seeing as the  
614 same images are tested over and over again (meaning they can be cached) and the testing dataset  
615 can be much smaller due to its locality. *Uniqueness* thus provides a stronger gradient estimation,  
616 while at the same time being more local (meaning it can be used independently of whether images  
617 are part of global segments), as well as more manageable in terms of speed and memory size.  
618 In the next four sections, we describe the training phases of our algorithm (1-3), and how the  
619 successfully trained network can be used to automatically correct trajectories based on its predic-  
620 tions (4).

### 621 1. The Initial Training Unit

622 All global segments are considered and sorted by the criteria listed below in 2. Accumulation of  
623 Additional Segments and Stopping-Criteria. The best suitable segment from the beginning of that  
624 set of segments is used as the initial dataset for the network. Images are split into a training and  
625 a validation set (4:1 ratio). Efforts are made to equalize the sample sizes per class/identity before-  
626 hand, but there has to always be a trade-off between similar sample sizes (encouraging unbiased  
627 priors) and having as many samples as possible available for the network to learn from. Thus, in or-

628 der to alleviate some of the severity of dealing with imbalanced datasets, the performance during  
629 training iterations is evaluated using a categorical focal loss function (*Lin et al., 2017*). Focal loss  
630 down-weights classes that are already reliably predicted by the network and in turn emphasizes ne-  
631 glected classes. An Adam optimizer (*Kingma and Ba, 2014*) is used to traverse the loss landscape  
632 towards the global (or to at least a local) minimum.

633 The network layout used for the classification in TRex (see Figure 1c) is a typical Convolutional  
634 Neural Network (CNN). The concepts of "convolutional" and "downsampling" layers, as well as the  
635 back-propagation used during training, are not new. They were introduced in *Fukushima (1988)*,  
636 inspired originally by the work of Hubel and Wiesel on cats and rhesus monkeys (*Hubel and Wiesel*  
637 *1959, Hubel and Wiesel 1963, Wiesel and Hubel 1966*), describing receptive fields and their hierar-  
638 chical structure in the visual cortex. Soon afterward, in *LeCun et al. (1989)*, CNNs, in combination  
639 with back-propagation, were already successfully used to recognize handwritten ZIP codes – for  
640 the first time, the learning process was fully automated. A critical step towards making their appli-  
641 cation practical, and the reason they are popular today.

642 The network architecture used in our software is similar to the identification module of the net-  
643 work in *Romero-Ferrero et al. (2019)*, and is, as in most typical CNNs, (reverse-)pyramid-like. How-  
644 ever, key differences between TRex' and *idtracker.ai*'s procedure lie with the way that training  
645 data is prepared (see previous sections) and how further segments are accumulated/evaluated  
646 (see next section). Furthermore, contrary to *idtracker.ai*'s approach, images in TRex are aug-  
647 mented (during training) before being passed on to the network. While this augmentation is rela-  
648 tively simple (random shift of the image in x-direction), it can help to account for positional noise  
649 introduced by e.g. the posture estimation or the video itself when the network is used for pre-  
650 dictions later on (*Perez and Wang, 2017*). We do not flip the image in this step, or rotate it, since  
651 this would defeat the purpose of using orientation normalization in the first place (as in *Minimiz-*  
652 *ing the Variance Landscape by Normalizing Samples*, see Figure 4). Here, in fact, normalization of  
653 object orientation (during training and predictions) could be seen as a superior alternative to data  
654 augmentation.

655 The input data for TRex' network is a single, cropped grayscale image of an individual (see Fig-  
656 ure 1c). This image is first passed through a "lambda" layer (blue) that normalizes the pixel values,  
657 dividing them by half the value limit of  $255/2 = 127.5$  and subtracting 1 – this moves them into the  
658 range of  $[-1, 1]$ . From then on, sections are a combination of convolutional layers (kernel sizes of  
659 16, 64 and 100 pixels), each followed by a 2D (2x2) max-pooling and a 2D spatial dropout layer  
660 (with a rate of 0.25). Within each of these blocks the input data is reduced further, focussing it  
661 down to information that is deemed important. Towards the end, the data are flattened and flow  
662 into a densely connected layer (100 units) with exactly as many outputs as the number of classes.  
663 The output is a vector with values between 0 and 1 for all elements of the vector, which, due to  
664 softmax-activation, sum to 1.

665 Training commences by performing a stochastic gradient descent (using the Adam optimizer,  
666 see *Kingma and Ba 2014*), which iteratively minimizes the error between network predictions and  
667 previously known associations of images with identities – the original assignments within the initial  
668 frame segment. The optimizer's behavior in the last five epochs is continuously observed and  
669 training is terminated immediately if one of the following criteria is met:

- 670 • the maximum number of iterations is reached (150 by default, but can be set by the user)
- 671 • a plateau is achieved at a high per-class accuracy
- 672 • overfitting/overly optimizing for the training data at the loss of generality
- 673 • no further improvements can be made (due to the accuracy within the current training data  
674 already being 1)

675 The initial training unit is also by far the most important as it determines the predicted identities  
676 within further segments that are to be added. It is thus less risky to overfit than it is important  
677 to get high-quality training results, and the algorithm has to be relatively conservative regarding

678 termination criteria. Later iterations, however, are only meant to extend an already existing dataset  
679 and thus (with computation speed in mind) allow for additional termination criteria to be added:

- 680 • plateauing at/circling around a certain `val_loss` level
- 681 • plateauing around a certain uniqueness level

## 682 2. Accumulation of Additional Segments and Stopping-Criteria

683 If necessary, initial training results can be improved by adding more samples to the active dataset.  
684 This could be done manually by the user, always trying to select the most promising segment next,  
685 but requiring such manual work is not acceptable for high-throughput processing. Instead, in order  
686 to translate this idea into features that can be calculated automatically, the following set of metrics  
687 is re-generated per (yet inactive) segment after each successful step:

- 688 1. Average uniqueness index (rounded to an integer percentage in 5% steps)
- 689 2. Minimal distance to regions that have previously been trained on (rounded to the next power  
690 of two), larger is better as it potentially includes samples more different from the already  
691 known ones
- 692 3. Minimum *cells visited* per individual (larger is better for the same reason as 2)
- 693 4. Minimum average samples per individual (larger is better)
- 694 5. Whether its image data has already been generated before (mostly for saving memory)
- 695 6. The uniqueness value is smaller than  $U_{prev}^2$  after 5 steps, with  $U_{prev}$  being the best uniqueness  
696 value previous to the current accumulation step

697 With the help of these values, the segment list is sorted and the best segment selected to be  
698 considered next. Adding a segment to a set of already active samples requires us to correct the  
699 identities inside it, potentially switching temporary identities to represent the same *real* identities  
700 as in our previous data. This is done by predicting identities for the new samples using the network  
701 that has been trained on the old samples. Making mistakes here can lead to significant subsequent  
702 problems, so merely plausible segments will be added - meaning only those samples are accepted  
703 for which the predicted IDs are *unique* within each unobstructed sequence of frames for every  
704 temporary identity. If multiple temporary individuals are predicted to be the same real identity,  
705 the segment is saved for later and the search continues.

706 If multiple additional segments are found, the program tries to actively improve local unique-  
707 ness valleys by adding samples first from regions with comparatively *low* accuracy predictions. See-  
708 ing as low accuracy regions will also most likely fail to predict unique identities, it is important to  
709 emphasize here that this is generally not a problem for the algorithm: Failed segments are sim-  
710 ply ignored and can be inserted back into the queue later. Smoothing the curve also makes sure  
711 to prefer regions close to valleys, making the algorithm follow the valley walls upwards in both  
712 directions.

713 Finishing a training unit does not necessarily mean that it was successful. Only the network  
714 states improving upon results from previous units are considered and saved. Any training result -  
715 except the initial one - may be rejected after training in case the uniqueness score has not improved  
716 globally, or at least remained within 99% of the previous best value. This ensures stability of the  
717 process, even with tracking errors present (which can be corrected for later on, see next section).  
718 If a segment is rejected, the network is restored to the best recorded state.

719 Each new segment is always combined with regularly sampled data from previous steps, en-  
720 suring that identities don't switch back and forth between steps due to uncertain predictions. If  
721 switching did occur, then the uniqueness and accuracy values can never reach high value regimes  
722 - leading to the training unit being discarded as a result. The contribution of each previously added  
723 segment  $R$  is limited to  $\lceil |R_s| / (\text{samples\_max} * |R| / N) \rceil$  samples, with  $N$  as the total number of frames  
724 in global segments for this individual and `samples_max` a constant that is calculated using image size  
725 and memory constraints (or 1GB by default).  $R_s$  is the actual *usable* number of images in segment

726 *R*. This limitation is an attempt to not bias the priors of the network by sub-sampling segments  
727 according to their contribution to the total number of frames in global segments.

728 Training is considered to be successful globally, as soon as either (i) accumulative individual  
729 gaps between sampled regions is less than 25% of the video length for all individuals, or (ii) unique-  
730 ness has reached a value higher than

$$1 - \frac{0.5}{N_{id}}, \quad (1)$$

731 so that almost all detected identities are present exactly once per frame. Otherwise, training will  
732 be continued as described above with additional segments – each time extending the percentage  
733 of images seen by the network further.

734 Training accuracy/consistency could potentially be further improved by letting the program add  
735 an arbitrary amount of segments, however we found this not to be necessary in any of our test-  
736 cases. Users are allowed to set a custom limit if required in their specific cases.

### 737 3. The Final Training Unit

738 After the accumulation phase, one last training step is performed. In previous steps, validation data  
739 has been kept strictly separate from the training set to get a better gauge on how generalizable the  
740 results are to unseen parts of the video. Now this is no longer an objective – so why not use *all* of  
741 the data available? The entire dataset is simply merged and sub-sampled again, according to the  
742 memory strategy used. Network training is started, with a maximum of  $\max\{3; \max\_epochs * 0.25\}$   
743 iterations ( $\max\_epochs$  is 150 by default). During this training, the same stopping-criteria apply as  
744 during the initial step.

745 Of course, typically, the answer to the above question of why *not* to do this would be "over-  
746 fitting". However, there is still a way to detect overfitting if it occurs: Only improvements upon  
747 previous steps – in terms of uniqueness – are saved, making this operation relatively safe. In fact,  
748 for some videos this is the step where most progress is made (e.g. Video 9). The reason being that  
749 this is the first time when all of the training data from all segments is considered at once (instead of  
750 mostly the current segment plus fewer samples from previously accepted segments), and samples  
751 from all parts of the video has an equal likelihood of being used in training after possible reduction  
752 due to memory-constraints.

### 753 4. Assigning Identities Based on Network Predictions

754 After the network has been successfully trained, all parts of the video which were not part of the  
755 training are packaged together and the network calculates predictive probabilities for each image  
756 of each individual to be any of the available identities. The vectors returned by the network are  
757 then averaged per consecutive segment per individual. The average probability vectors for all over-  
758 lapping segments are weighed against each other – usually forcing assignment to the most likely  
759 identity (ID) for each segment, given that no other segments have similar probabilities. When re-  
760 ferring to segments here, meant is simply a number of consecutive frames of one individual that  
761 the tracker is fairly sure does *not* contain any mix-ups. We implemented a way to detect tracking  
762 mistakes, which is mentioned later.

763 If an assignment is ambiguous, meaning that multiple segments  $S_{j\dots M}$  overlapping in time have  
764 the same maximum probability index  $\arg \max_{i \in \{0, N\}} \{P(i | S_j)\}$  (for the segment to belong to a certain  
765 identity  $i$ ), a decision has to be made. Assignments are deferred if the ratio

$$R_{\max} = \max \left\{ \frac{P(i | S_j)}{P(i | S_k)}, \forall S_{j \neq k} \in \text{overlapping segments} \right\}$$

766 between any two maximal probabilities is *larger than* 0.6 for said  $i$  ( $R_{\max}$  is inverted if it is greater  
767 than 1). In such a case, we rely on the general purpose tracking algorithm to pick a sensible op-  
768 tion – other identities might even be successfully assigned (using network predictions) in following  
769 frames, which is a complexity we do not have to deal with here. In case all ratios are *below* 0.6,



770 when the best choices per identity are not too ambiguous, the following steps are performed to  
771 resolve remaining conflicts:

- 772 1. count the number of samples  $N_{me}$  in the current segment, and the number of samples  $N_{he}$  in  
773 the other segment that this segment is compared to
- 774 2. calculate average probability vectors  $P_{me}$  and  $P_{he}$
- 775 3. if  $S(P_{me}, N_{me}) \geq S(P_{he}, N_{he})$ , then assign the current segment with the ID in question. Otherwise  
776 assign the ID to the other segment. Where:

$$\text{norm}(x) = \frac{x}{N_{me} + N_{he}}, \text{sig}(x) = (1 + e^{2\pi(0.5-x)})^{-1} \quad (2)$$
$$S(p, x) = \text{sig}(p) + \text{sig}(\text{norm}(x)).$$

777 This procedure prefers segments with larger numbers of samples over segments with fewer  
778 samples, ensuring that identities are not switched around randomly whenever a short segment  
779 (e.g. of noisy data) is predicted to be the given identity for a few frames – at least as long as a  
780 better alternative is available. The non-linearity in  $S(p, x)$  exaggerates differences between lower  
781 values and dampens differences between higher values: For example, the quality of a segment  
782 with 4000 samples is barely different from a segment with 5000 samples; however, there is likely to  
783 be a significant quality difference between segments with 10 and 100 samples.

784 In case something goes wrong during the tracking, e.g. an individual is switched with another  
785 individual without the program knowing that it might have happened, the training might still be  
786 successful (for example if that particular segment has not been used for training). In such cases,  
787 the program tries to correct for identity switches mid-segment by calculating a running-window  
788 median identity throughout the whole segment. If the identity switches for a significant length of  
789 time, before identities are assigned to segments, the segment is split up at the point of the first  
790 change within the window and the two parts are handled as separate segments from then on.

## 791 Results

792 Below we assess TRex' performance regarding three properties that are most important when us-  
793 ing it (or in fact any tracking software) in practice: (i) The time it takes to perform tracking (ii) the  
794 time it takes to perform automatic identity correction and (iii) the peak memory consumption when  
795 correcting identities (since this is where memory consumption is maximal), as well as (iv) the accu-  
796 racy of the produced trajectories after visual identification. While accuracy is an important metric  
797 and specific to identification tasks, time and memory are typically of considerable practical im-  
798 portance for all tasks. For example, tracking-speed may be the difference between only being  
799 able to run a few trials or producing more reliable results with a much larger number of trials.  
800 In addition, tracking speed can make a major difference as the number of individuals increases.  
801 Furthermore, memory constraints can be extremely prohibitive making tracking over long video  
802 sequences and/or for a large number of individuals extremely time-consuming, or impossible, for  
803 the user.

804 In all of our tests we used a relatively modest computer system, which could be described as a  
805 mid-range consumer or gaming PC:

- 806 • Intel Core i9-7900X CPU
- 807 • NVIDIA Geforce 1080 Ti
- 808 • 64GB RAM
- 809 • NVMe PCIe x4 hard-drive
- 810 • Debian bullseye ([debian.org](https://www.debian.org))

811 As can be seen in the following sections (memory consumption, processing speeds, etc.) using  
812 a high-end system is not necessary to run TRex and, anecdotally, we did not observe noticeable  
813 improvements when using a solid state drive versus a normal hard drive. A video card (presently

**Table 1.** A list of the videos used in this paper as part of the evaluation of TRex, along with the species of animals in the videos and their common names, as well as other video-specific properties. Videos are given an incremental ID, to make references more efficient in the following text, which are sorted by the number of individuals in the video. Individual quantities are given accurately, except for the videos with more than 100 where the exact number may be slightly more or less. These videos have been analysed using TRex' dynamic analysis mode that supports unknown quantities of animals.

| ID | species                              | common    | # ind. | fps (Hz) | duration   | size (px <sup>2</sup> ) |
|----|--------------------------------------|-----------|--------|----------|------------|-------------------------|
| 0  | <i>Leucaspius delineatus</i>         | sunbleak  | 1024   | 40       | 8min20s    | 3866 × 4048             |
| 1  | <i>Leucaspius delineatus</i>         | sunbleak  | 512    | 50       | 6min40s    | 3866 × 4140             |
| 2  | <i>Leucaspius delineatus</i>         | sunbleak  | 512    | 60       | 5min59s    | 3866 × 4048             |
| 3  | <i>Leucaspius delineatus</i>         | sunbleak  | 256    | 50       | 6min40s    | 3866 × 4140             |
| 4  | <i>Leucaspius delineatus</i>         | sunbleak  | 256    | 60       | 5min59s    | 3866 × 4048             |
| 5  | <i>Leucaspius delineatus</i>         | sunbleak  | 128    | 60       | 6min       | 3866 × 4048             |
| 6  | <i>Leucaspius delineatus</i>         | sunbleak  | 128    | 60       | 5min59s    | 3866 × 4048             |
| 7  | <i>Danio rerio</i>                   | zebrafish | 100    | 32       | 1min       | 3584 × 3500             |
| 8  | <i>Drosophila melanogaster</i>       | fruit-fly | 59     | 51       | 10min      | 2306 × 2306             |
| 9  | <i>Schistocerca gregaria</i>         | locust    | 15     | 25       | 1h0min     | 1880 × 1881             |
| 10 | <i>Constrictotermes cyphergaster</i> | termite   | 10     | 100      | 10min5s    | 1920 × 1080             |
| 11 | <i>Danio rerio</i>                   | zebrafish | 10     | 32       | 10min10s   | 3712 × 3712             |
| 12 | <i>Danio rerio</i>                   | zebrafish | 10     | 32       | 10min3s    | 3712 × 3712             |
| 13 | <i>Danio rerio</i>                   | zebrafish | 10     | 32       | 10min3s    | 3712 × 3712             |
| 14 | <i>Poecilia reticulata</i>           | guppy     | 8      | 30       | 3h15min22s | 3008 × 3008             |
| 15 | <i>Poecilia reticulata</i>           | guppy     | 8      | 25       | 1h12min    | 3008 × 3008             |
| 16 | <i>Poecilia reticulata</i>           | guppy     | 8      | 35       | 3h18min13s | 3008 × 3008             |
| 17 | <i>Poecilia reticulata</i>           | guppy     | 1      | 140      | 1h9min32s  | 1312 × 1312             |

**Table 1-source data 1.** Videos 7 and 8, as well as 13 - 11, are available as part of the original `idtracker` paper (Pérez-Escudero et al. (2014)). Many of the videos are part of yet unpublished data: Guppy videos have been recorded by A. Albi, videos with sunbleak (*Leucaspius delineatus*) have been recorded by D. Bath. The termite video has been kindly provided by H. Hugo and the locust video by F. Oberhauser. Due to the size of some of these videos (>200GB per video), they have to be made available upon specific request. Example clips from some of the videos are available at [trex.run/docs](http://trex.run/docs).

814 an NVIDIA card due to the requirements of TensorFlow) is recommended for tasks involving visual  
 815 identification as such computations will take much longer without it – however, it is not required.  
 816 We decided to employ this system due to having a relatively cheap, compatible graphics card, as  
 817 well as to ensure that we have an easy way to produce direct comparisons with `idtracker.ai`  
 818 – which according to their website requires large amounts of RAM (32-128GB, [idtracker.ai online](https://idtracker.ai)  
 819 [documentation](https://idtracker.ai), accessed 05/21/2020) and a fast solid-state drive.

820 **Table 1** shows the entire set of videos used in this paper, which have been obtained from mul-  
 821 tiple sources (credited under the table) and span a wide range of different organisms, demonstrat-  
 822 ing TRex' ability to track anything as long as it moves occasionally. Videos involving a large number  
 823 (>100) of individuals are all the same species of fish since these were the only organisms we had  
 824 available in such quantities. However, this is not to say that only fish could be tracked efficiently  
 825 in these quantities. We used the full dataset with up to 1024 individuals in one video (Video 0) to  
 826 evaluate raw tracking speed without visual identification and identity corrections (next sub-section).  
 827 However, since such numbers of individuals exceed the capacity of the neural network used for  
 828 automatic identity corrections (compare also [Romero-Ferrero et al. \(2019\)](https://doi.org/10.1101/2019.08.01.266441) who used a similar net-  
 829 work), we only used a subset of these videos (videos 7 through 16) to look specifically into the  
 830 quality of our visual identification in terms of keeping identities and its memory consumption.

### 831 **Tracking: Speed and Accuracy**

832 In evaluating the Tracking portion of TRex, the main focus lies with processing speed, while accu-  
833 racy in terms of keeping identities is of secondary importance. Tracking is required in all other  
834 parts of the software, making it an attractive target for extensive optimization. Especially with re-  
835 gards to closed-loop, and live-tracking situations, there may be no room even to lose a millisecond  
836 between frames and thus risk dropping frames. We therefore designed TRex to support the simul-  
837 taneous tracking of many ( $\geq 256$ ) individuals *quickly* and achieve reasonable *accuracy* for up to 100  
838 individuals – which are the two suppositions we will investigate in the following.

839 Trials were run without posture/visual-field estimation enabled, where tracking generally, and  
840 consistently, reaches speeds faster than real-time (processing times of 1.5-40% of the video dura-  
841 tion, 25-100Hz) even for a relatively large number of individuals (77-94.77% for up to 256 individ-  
842 uals, see **Table A1**). Videos with more individuals ( $>500$ ) were still tracked within reasonable time  
843 of 235% to 358% of the video duration. As would be expected from these results, we found that  
844 combining tracking and recording in a single step generally leads to higher processing speeds. The  
845 only situation where this was not the case was a video with 1024 individuals, which suggests that  
846 live-tracking (in TGrabs) handles cases with many individuals slightly worse than offline tracking (in  
847 TRex). Otherwise, 5% to 35% shorter total processing times were measured (14.55% on average,  
848 see **Table A4**), compared to running TGrabs separately and then tracking in TRex. These percent-  
849 age differences, in most cases, reflect the ratio between the video duration and the time it takes to  
850 track it, suggesting that most time is spent – by far – on the conversion of videos. This additional  
851 cost can be avoided in practice when using TGrabs to record videos, by directly writing to a custom  
852 format recognized by TRex, and/or using its live-tracking ability to export tracking data immediately  
853 after the recording is stopped.

854 We also investigated trials that were run with posture estimation *enabled* and we found that  
855 real-time speed could be achieved for videos with  $\leq 128$  individuals (see column "tracking" in **Ta-**  
856 **ble A4**). Tracking speed, when posture estimation is enabled, depends more strongly on the size  
857 of individuals in the image.

858 Generally, tracking software becomes slower as the number of individuals to be tracked in-  
859 creases, as a result of an exponentially growing number of combinations to consider during match-  
860 ing. Comparing our mixed approach (see Tracking) to purely using the *Hungarian method* (also  
861 known as the *Kuhn-Munkres algorithm*) shows that, while both perform similarly for few individu-  
862 als, the Hungarian method is easily outperformed by our algorithm for larger groups of individuals  
863 (as can be seen in Figure A3). This might be due to custom optimizations regarding local cliques of  
864 individuals, whereby we ignore objects that are too far away, and also as a result of our optimized  
865 pre-sorting. The Hungarian method has the advantage of not leading to combinatorial explosions  
866 in some situations – and thus has a lower *maximum* complexity while proving to be less optimal in  
867 the *average* case. For further details, see the appendix: Matching an object to an object in the next  
868 frame.

869 In addition to speed, we also tested the accuracy of our tracking method, with regards to  
870 the consistency of identity assignments, comparing its results to the manually reviewed data (the  
871 methodology of which is described in the next section). In order to avoid counting follow-up errors  
872 as "new" errors, we divided each trajectory in the uncorrected data into "uninterrupted" segments  
873 of frames, instead of simply comparing whole trajectories. A segment is interrupted when an in-  
874 dividual is lost (for any of the reasons given in Preparing Tracking-Data) and starts again when it  
875 is reassigned to another object later on. We term these (re-)assignments *decisions* here. Each seg-  
876 ment of every individual can be uniquely assigned to a similar/identical segment in the baseline  
877 data and its identity. Following one trajectory in the uncorrected data, we can detect these wrong  
878 decisions by checking whether the baseline identity associated with one segment of that trajectory  
879 changes in the next. We found that roughly 80% of such decisions made by the tree-based match-  
880 ing were correct, even with relatively high numbers of individuals (100). For trajectories where

881 no manually reviewed data were available, we used automatically corrected trajectories as a base  
882 for our comparison – we evaluate the accuracy of these automatically corrected trajectories in the  
883 following section. Even though we did not investigate accuracy in situations with more than 100  
884 individuals, we suspect similar results since the property with the strongest influence on tracking  
885 accuracy – individual density – is limited physically and most of the investigated species school  
886 tightly in either case.

### 887 **Visual Identification: Accuracy**

888 Since the goal of using visual identification is to generate consistent identity assignments, we eval-  
889 uated the accuracy of our method in this regard. As a benchmark, we compare it to manually  
890 reviewed datasets as well as results from `idtracker.ai` for the same set of videos (where possi-  
891 ble). In order to validate trajectories exported by either software, we manually reviewed multiple  
892 videos with the help from a tool within TRex that allows to view each crossing and correct possi-  
893 ble mistakes in-place. Assignments were deemed incorrect, and subsequently corrected by the  
894 reviewer, if the centroid of a given individual was not contained within the object it was assigned  
895 to (e.g. the individual was not part of the correct object). Double assignments per object are im-  
896 possible due to the nature of the tracking method. Individuals were also forcibly assigned to the  
897 correct objects in case they were visible but not detected by the tracking algorithm. After manual  
898 corrections had been applied, "clean" trajectories were exported – providing a per-frame baseline  
899 truth for the respective videos. A complete table of reviewed videos, and the percentage of re-  
900 viewed frames per video, can be found in **Table 3**. For longer videos (>1h) we relied entirely on  
901 a comparison between results from `idtracker.ai` and TRex. Their paper (**Romero-Ferrero et al.**  
902 **(2019)**) suggests a very high accuracy of over 99.9% correctly identified individual images for most  
903 videos, which should suffice for most relevant applications and provide a good baseline truth. As  
904 long as both tools produce sufficiently similar trajectories, we therefore know they have found the  
905 correct solution.

**Table 2.** Evaluating comparability of the automatic visual identification between `idtracker.ai` and TRex. Columns show various video properties, as well as the associated uniqueness score (see **Box 1**) and a similarity metric. Similarity (% similar individuals) is calculated based on comparing the positions for each identity exported by both tools, choosing the closest matches overall and counting the ones that are differently assigned per frame. An individual is classified as "wrong" in that frame, if the euclidean distance between the matched solutions from `idtracker.ai` and TRex exceeds 1% of the video width. The column "% similar individuals" shows percentage values, where a value of 99% would indicate that, on average, 1% of the individuals are assigned differently. To demonstrate how uniqueness corresponds to the quality of results, the last column shows the average uniqueness achieved across trials.

| video | # ind. | N TRex | % similar individuals | $\phi$ final uniqueness |
|-------|--------|--------|-----------------------|-------------------------|
| 7     | 100    | 5      | 99.9522 $\pm$ 0.2536  | 0.9758 $\pm$ 0.0018     |
| 8     | 59     | 5      | 99.7249 $\pm$ 0.5586  | 0.9356 $\pm$ 0.0358     |
| 13    | 10     | 5      | 99.9907 $\pm$ 0.3668  | 0.9812 $\pm$ 0.0013     |
| 12    | 10     | 5      | 99.9565 $\pm$ 0.8381  | 0.9698 $\pm$ 0.0024     |
| 11    | 10     | 5      | 99.9218 $\pm$ 1.116   | 0.9461 $\pm$ 0.0039     |
| 14    | 8      | 5      | 98.8185 $\pm$ 5.8095  | 0.9192 $\pm$ 0.0077     |
| 15    | 8      | 5      | 99.241 $\pm$ 4.2876   | 0.9576 $\pm$ 0.0023     |
| 16    | 8      | 5      | 99.8063 $\pm$ 1.9556  | 0.9481 $\pm$ 0.0025     |

906 A direct comparison between TRex and `idtracker.ai` was not possible for videos 9 and 10  
907 , where `idtracker.ai` frequently exceeded hardware memory-limits and caused the application  
908 to be terminated, or did not produce usable results within multiple days of run-time. However,  
909 we were able to successfully analyse these videos with TRex and evaluate its performance by com-  
910 paring to manually reviewed trajectories (see below in Visual Identification: Accuracy). Due to the

**Table 3.** Results of the human validation for a subset of videos. Validation was performed by going through all problematic situations (e.g. individuals lost) and correcting mistakes manually, creating a fully corrected dataset for the given videos. This dataset may still have missing frames for some individuals, if they could not be detected in certain frames (as indicated by "of that interpolated"). This was usually a very low percentage of all frames, except for Video 9, where individuals tended to rest on top of each other – and were thus not tracked – for extended periods of time. This baseline dataset was compared to all other results obtained using the automatic visual identification by TRex ( $N = 5$ ) and *idtracker.ai* ( $N = 3$ ) to estimate correctness. We were not able to track videos 9 and 10 with *idtracker.ai*, which is why correctness values are not available.

| video metrics |        | review stats |                          | % correct     |                     |
|---------------|--------|--------------|--------------------------|---------------|---------------------|
| video         | # ind. | reviewed (%) | of that interpolated (%) | TRex          | <i>idtracker.ai</i> |
| 7             | 100    | 100.0        | 0.23                     | 99.97 ± 0.013 | 98.95 ± 0.146       |
| 8             | 59     | 100.0        | 0.15                     | 99.68 ± 0.533 | 99.94 ± 0.0         |
| 9             | 15     | 22.2         | 8.44                     | 95.12 ± 6.077 | N/A                 |
| 10            | 10     | 100.0        | 1.21                     | 99.7 ± 0.088  | N/A                 |
| 13            | 10     | 100.0        | 0.27                     | 99.98 ± 0.0   | 99.96 ± 0.0         |
| 12            | 10     | 100.0        | 0.59                     | 99.94 ± 0.006 | 99.63 ± 0.0         |
| 11            | 10     | 100.0        | 0.5                      | 99.89 ± 0.009 | 99.34 ± 0.002       |

stochastic nature of machine learning, and thus the inherent possibility of obtaining different results in each run, as well as other potential factors influencing processing time and memory consumption, both TRex and *idtracker.ai* have been executed repeatedly (5x TRex, 3x *idtracker.ai*).

The trajectories exported by both *idtracker.ai* and TRex were very similar throughout (see **Table 2**). While occasional disagreements happened, similarity scores were higher than 99% in all cases (i.e. less than 1% of individuals have been differently assigned in each frame on average). Most difficulties that *did* occur were, after manual review, attributable to situations where multiple individuals cross over excessively within a short time-span. In each case that has been manually reviewed, identities switched back to the correct individuals – even after temporary disagreement. We found that both solutions occasionally experienced these same problems, which often occur when individuals repeatedly come in and out of view in quick succession (e.g. overlapping with other individuals). Disagreements were expected for videos with many such situations due to the way both algorithms deal differently with them: *idtracker.ai* assigns identities only based on the network output. In many cases, individuals continue to partly overlap even while already being tracked, which results in visual artifacts and can lead to unstable predictions by the network and causing *idtracker.ai*'s approach to fail. Comparing results from both *idtracker.ai* and TRex to manually reviewed data (see **Table 3**) shows that both solutions consistently provide high accuracy results of above 99.5% for most videos, but that TRex is slightly improved in all cases while also having a better overall frame coverage per individual (99.65% versus *idtracker.ai*'s 97.93%, where 100% would mean that all individuals are tracked in every frame; not shown). This suggests that the splitting algorithm (see appendix, Algorithm for splitting touching individuals) is working to TRex' advantage here.

Additionally, while TRex could successfully track individuals in all videos without tags, we were interested to see the effect of tags (in this case QR tags attached to locusts, see **Figure 5a**) on network training. In **Figure 5** we visualise differences in network activation, depending on the visual features available for the network to learn from, which are different between species (or due to physically added tags, as mentioned above). The "hot" regions indicate larger between-class differences for that specific pixel (values are the result of activation in the last convolutional layer of the trained network, see figure legend). Differences are computed separately within each group and are not directly comparable between trials/species in value. However, the distribution of values – reflecting the network's reactivity to specific parts of the image – is. Results show that the most apparent differences are found for the stationary parts of the body (not in absolute terms,



**Figure 5.** Activation differences for images of randomly selected individuals from four videos, next to a median image of the respective individual – which hides thin extremities, such as legs in (a) and (c). The captions in (a-d) detail the species per group and number of samples per individual. Colors represent the relative activation differences, with hotter colors suggesting bigger magnitudes, which are computed by performing a forward-pass through the network up to the last convolutional layer (using *keract*). The outputs for each identity are averaged and stretched back to the original image size by cropping and scaling according to the network architecture. Differences shown here are calculated per cluster of pixels corresponding to each filter, comparing average activations for images from the individual's class to activations for images from other classes.

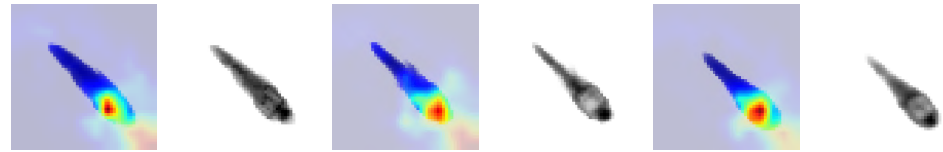

**(a)** Locusts from Video 9 with 15 tagged individuals (N: 5101, 7942, 9974) – the only video with physical tags. The network activates more strongly in regions close to the tag, as well as the bottom right corner.

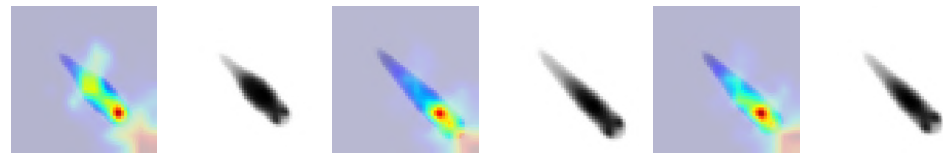

**(b)** Guppies from Video 15 (N: 46378, 34733, 34745). Activations are less focussed and less consistent across individuals.

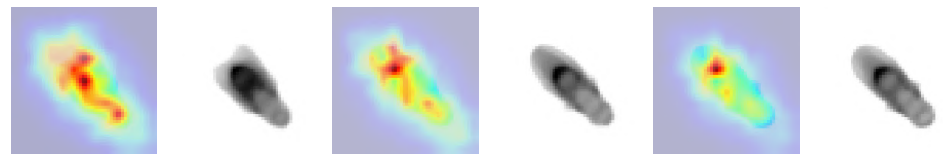

**(c)** Flies from Video 8 (N: 993, 1986, 993). Activations are not similar between individuals and show various "hotspots" across the entire body.

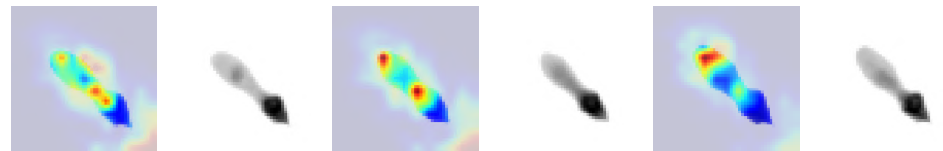

**(d)** Termites from Video 10 (N: 27097, 31135, 22746). Here, the connections between body-segments show strong activations – in contrast to very weak ones in other parts of the body.

943 but following normalization, as shown in **Figure 4c**), which makes sense seeing as this part (i) is the  
944 easiest to learn due to it being in exactly the same position every time, (ii) larger individuals stretch  
945 further into the corners of a cropped image, making the bottom right of each image a source of  
946 valuable information (especially in **Figure 5a**/**Figure 5b**) and (iii) details that often occur in the head-  
947 region (like distance between the eyes) which can also play a role here. "Hot" regions in the bottom  
948 right corner of the activation images (e.g. in **Figure 5d**) suggest that also pixels are reacted to which  
949 are explicitly *not* part of the individual itself but of other individuals – likely this corresponds to the  
950 network making use of size/shape differences between them.

951 As would be expected, distinct patterns can be recognized in the resulting activations after  
952 training as soon as physical tags are attached to individuals (as in **Figure 5a**). While other parts  
953 of the image are still heavily activated (probably to benefit from size/shape differences between  
954 individuals), tags are always at least a large part of where activations concentrate. The network  
955 seemingly makes use of the additional information provided by the experimenter, where that has  
956 occurred. This suggests that, while definitely not being necessary, adding tags probably does not

**Table 4.** Both TRex and `idtracker.ai` analysed the same set of videos, while continuously logging their memory consumption using an external tool. Rows have been sorted by `video_length * #individuals`, which seems to be a good predictor for the memory consumption of both solutions. `idtracker.ai` has mixed mean values, which, at low individual densities are similar to TRex' results. Mean values can be misleading here, since more time spent in low-memory states skews results. The maximum, however, is more reliable since it marks the memory that is necessary to run the system. Here, `idtracker.ai` clocks in at significantly higher values (almost always more than double) than TRex.

| video | #ind. | length | max.consec. | TRex memory (GB)                       | <code>idtracker.ai</code> memory (GB)   |
|-------|-------|--------|-------------|----------------------------------------|-----------------------------------------|
| 12    | 10    | 10min  | 26.03s      | $\emptyset 4.88 \pm 0.23$ , max 6.31   | $\emptyset 8.23 \pm 0.99$ , max 28.85   |
| 13    | 10    | 10min  | 36.94s      | $\emptyset 4.27 \pm 0.12$ , max 4.79   | $\emptyset 7.83 \pm 1.05$ , max 29.43   |
| 11    | 10    | 10min  | 28.75s      | $\emptyset 4.37 \pm 0.32$ , max 5.49   | $\emptyset 6.53 \pm 4.29$ , max 29.32   |
| 7     | 100   | 1min   | 5.97s       | $\emptyset 9.4 \pm 0.47$ , max 13.45   | $\emptyset 15.27 \pm 1.05$ , max 24.39  |
| 15    | 8     | 72min  | 79.4s       | $\emptyset 5.6 \pm 0.22$ , max 8.41    | $\emptyset 35.2 \pm 4.51$ , max 91.26   |
| 10    | 10    | 10min  | 1.91s       | $\emptyset 6.94 \pm 0.27$ , max 10.71  | N/A                                     |
| 9     | 15    | 60min  | 7.64s       | $\emptyset 13.81 \pm 0.53$ , max 16.99 | N/A                                     |
| 8     | 59    | 10min  | 102.35s     | $\emptyset 12.4 \pm 0.56$ , max 17.41  | $\emptyset 35.3 \pm 0.92$ , max 50.26   |
| 14    | 8     | 195min | 145.77s     | $\emptyset 12.44 \pm 0.8$ , max 21.99  | $\emptyset 35.08 \pm 4.08$ , max 98.04  |
| 16    | 8     | 198min | 322.57s     | $\emptyset 16.15 \pm 1.6$ , max 28.62  | $\emptyset 49.24 \pm 8.21$ , max 115.37 |

957 worsen, and likely may even improve, training accuracy, for difficult cases allowing networks to  
958 exploit any source of inter-individual variation.

#### 959 **Visual Identification: Memory Consumption**

960 In order to generate comparable results between both tested software solutions, the same exter-  
961 nal script has been used to measure shared, private and swap memory of `idtracker.ai` and TRex,  
962 respectively. There are a number of ways with which to determine the memory usage of a process.  
963 For automation purposes we decided to use a tool called `syropy`, which can start and save informa-  
964 tion about a specified command automatically. We modified it slightly, so we could obtain more  
965 accurate measurements for Swap, Shared and Private separately, using `ps_mem`.

966 As expected, differences in memory consumption are especially prominent for long videos (4-7x  
967 lower maximum memory), and for videos with many individuals (2-3x lower). Since we already ex-  
968 perience significant problems tracking a long video (>3h) of only 8 individuals with `idtracker.ai`,  
969 we did not attempt to further study its behavior in long videos with many individuals. However, we  
970 would expect `idtracker.ai`'s memory usage to increase even more rapidly than is visible in Figure 6  
971 since it retains a lot of image data (segmentation/pixels) in memory and we already had to "allow"  
972 it to relay to hard-disk in our efforts to make it work for Videos 8, 14 and 16 (which slows down  
973 analysis). The maximum memory consumption across all trials was on average  $5.01 \pm 2.54$  times  
974 higher in `idtracker.ai`, ranging from 1.81 to 10.85 times the maximum memory consumption of  
975 TRex for the same video.

976 Overall memory consumption for TRex also contains posture data, which contributes a lot to  
977 RAM usage. Especially with longer videos, disabling posture can lower the hardware needs for run-  
978 ning our software. If posture is to be retained, the user can still (more slightly) reduce memory  
979 requirements by changing the outline re-sampling scale (1 by default), which adjusts the outline  
980 resolution between sub- and super-pixel accuracy. While analysis will be faster – and memory con-  
981 sumption lower – when posture is disabled (only limited by the matching algorithm, see Figure A3),  
982 users of the visual identification might experience a decrease in training accuracy or speed (see  
983 Figure 7).

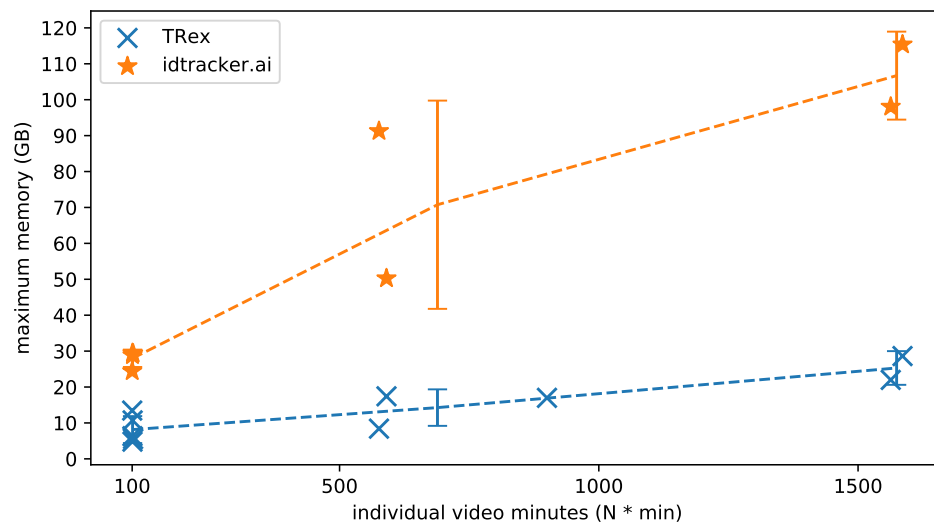

**Figure 6.** The maximum memory by TRex and `idtracker.ai` when tracking videos from a subset of all videos (the same videos as in [Table 2](#)). Results are plotted as a function of video length (min) multiplied by the number of individuals. We have to emphasize here that, for the videos in the upper length regions of multiple hours (16, 14), we had to set `idtracker.ai` to store segmentation information on disk – as opposed to in RAM. This uses less memory, but is also slower. For the video with flies we tried out both and also settled for `idtracker.ai`, since otherwise the system ran out of memory. Even then, the curve still accelerates much faster for `idtracker.ai`, ultimately leading to problems with most computer systems. To minimize the impact that hardware compatibility has on research, we implemented switches limiting memory usage while always trying to maximize performance given the available data. TRex can be used on modern laptops and normal consumer hardware at slightly lower speeds, but without any *fatal* issues.

## 984 Visual Identification: Processing Time

985 Automatically correcting the trajectories (to produce consistent identity assignments) means that  
986 additional time is spent on the training and application of a network, specifically for the video  
987 in question. Visual identification builds on some of the other methods described in this paper  
988 (tracking and posture estimation), naturally making it by far the most complex and time-consuming  
989 process in TRex – we thus evaluated how much time is spent on the entire sequence of all required  
990 processes. For each run of TRex and `idtracker.ai`, we saved precise timing information from start  
991 to finish. Since `idtracker.ai` reads videos *directly* and preprocesses them again each run, we used  
992 the same starting conditions with our software for a direct comparison:

993 A trial starts by converting/preprocessing a video in TGrabs and then immediately opening it in  
994 TRex, where automatic identity corrections were applied. TRex terminated automatically after sat-  
995 isfying a correctness criterion (high uniqueness value) according to equation (1). It then exported  
996 trajectories, as well as validation data (similar to `idtracker.ai`), concluding the trial. The sum of  
997 time spent within TGrabs and TRex gives the total amount of time for that trial. For the purpose of  
998 this test it would not have been fair to compare only TRex processing times to `idtracker.ai`, but  
999 it is important to emphasize that conversion could be skipped entirely by using TGrabs to record  
1000 videos directly from a camera instead of opening an existing video file.

1001 In [Table 5](#) we can see that video length and processing times did not correlate directly. In-  
1002 deed, conversion times eventually overtook processing times with increasing video-length if the  
1003 number of individuals remained the same. Furthermore, the time it took to track and correct a  
1004 video was shorter when the initial segment (column "sample" in the table) was longer (and as such  
1005 likely of higher quality/capturing more visual intra-individual variation). Conversion times corre-  
1006 lated strongly with the total video-length (in frames) and not the number of individuals, suggesting  
1007 conversion was only constrained by video-decoding/reading speeds and not by (pre-)processing.

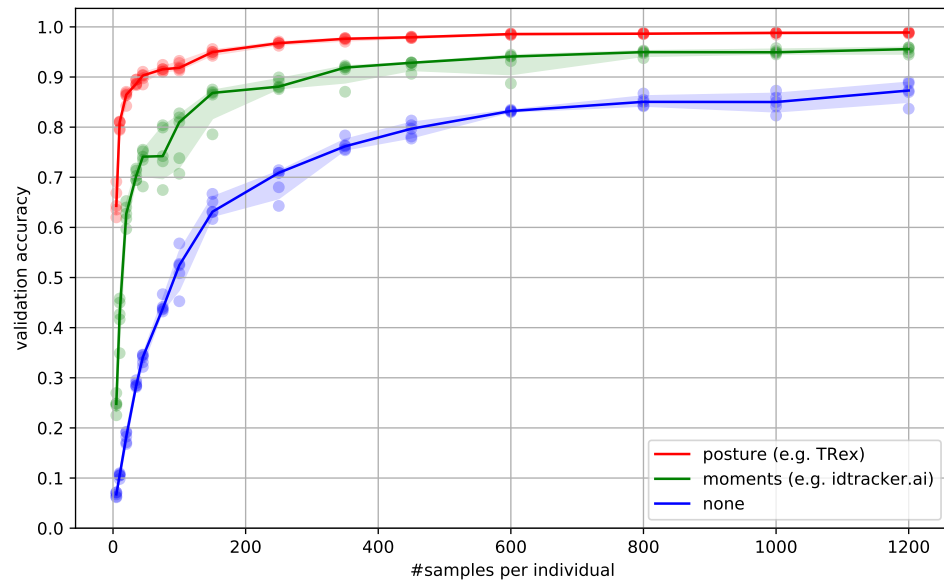

**Figure 7.** Convergence behavior of the network training for three different normalization methods. This shows the maximum achievable validation accuracy after 100 epochs for 100 individuals (Video 7), when sub-sampling the number of examples per individual. Tests were performed using a manually corrected training dataset to generate the images in three different ways, using the same, independent script (see Figure 4): Using no normalization (blue), using normalization based on image moments (green, similar to `idtracker.ai`), and using posture information (red, as in `TRex`). Higher numbers of samples per individual result in higher maximum accuracy overall, but – unlike the other methods – posture-normalized runs already reach an accuracy above the 90% mark for  $\geq 75$  samples. This property can help significantly in situations with more crossings, when longer global segments are harder to find.

1008 Compared to `idtracker.ai`, `TRex` (conversion + visual identification) shows both considerably  
1009 lower computation times (2.57x to 46.74x faster for the same video), as well as lower variance in  
1010 the timings (79% lower for the same video on average).

## 1011 Conclusions

1012 `TRex` provides a comprehensive, powerful and easy to use software solution for tracking animals.  
1013 Its tracking accuracy is at the state-of-the-art while typically being 2.57x to 46.74x faster than com-  
1014 parable software and having lower hardware requirements – specifically RAM. In addition to visual  
1015 identification and tracking, it provides a rich assortment of additional data, including body posture,  
1016 visual fields, and other kinematic as well as group-related information (such as derivatives of  
1017 position, border and mean neighbor distance, group compactness, etc.); even in live-tracking and  
1018 closed-loop situations.

1019 Raw tracking speeds (without visual identification) still achieved roughly 80% accuracy per deci-  
1020 sion (as compared to >99% with visual identification). We have found that real-time performance  
1021 can be achieved, even on relatively modest hardware, for all numbers of individuals  $\leq 256$  with-  
1022 out posture estimation ( $\leq 128$  with posture estimation). More than 256 individuals can be tracked  
1023 as well, remarkably still delivering frame-rates at about 10-25 frames per second using the same  
1024 settings.

1025 `TRex` is a versatile and fast program, which we have designed to enable researches to study ani-  
1026 mals (and other mobile objects) in a wide range of situations. It maintains identities of up to 100  
1027 un-tagged individuals and produces corrected tracks, along with posture estimation and other fea-  
1028 tures. Even videos that can not be tracked by other solutions, such as videos with over 500 animals,  
1029 can now be tracked within the same day of recording. Not only does the increased processing-  
1030 speeds benefit researchers, but the contributions we provide to data exploration should not be

**Table 5.** Evaluating time-cost for automatic identity correction – comparing to results from `idtracker.ai`. Timings consist of preprocessing time in TGrabs plus network training in TRex, which are shown separately as well as combined (*ours (min)*,  $N = 5$ ). The time it takes to analyse videos strongly depends on the number of individuals and how many usable samples per individual the initial segment provides. The length of the video factors in as well, as does the stochasticity of the gradient descent (training). `idtracker.ai` timings ( $N = 3$ ) contain the whole tracking and training process from start to finish, using its `terminal_mode (v3)`. Parameters have been manually adjusted per video and setting, to the best of our abilities, spending at most one hour per configuration. For videos 16 and 14 we had to set `idtracker.ai` to storing segmentation information on disk (as compared to in RAM) to prevent the program from being terminated for running out of memory.

| video | # ind. | length | sample  | TGrabs (min)      | TRex (min)        | ours (min) | <code>idtracker.ai</code> (min) |
|-------|--------|--------|---------|-------------------|-------------------|------------|---------------------------------|
| 7     | 100    | 1min   | 1.61s   | $2.03 \pm 0.02$   | $74.62 \pm 6.75$  | 76.65      | $392.22 \pm 119.43$             |
| 8     | 59     | 10min  | 19.46s  | $9.28 \pm 0.08$   | $96.7 \pm 4.45$   | 105.98     | $4953.82 \pm 115.92$            |
| 9     | 15     | 60min  | 33.81s  | $13.17 \pm 0.12$  | $101.5 \pm 1.85$  | 114.67     | N/A                             |
| 11    | 10     | 10min  | 12.31s  | $8.8 \pm 0.12$    | $21.42 \pm 2.45$  | 30.22      | $127.43 \pm 57.02$              |
| 12    | 10     | 10min  | 10.0s   | $8.65 \pm 0.07$   | $23.37 \pm 3.83$  | 32.02      | $82.28 \pm 3.83$                |
| 13    | 10     | 10min  | 36.91s  | $8.65 \pm 0.07$   | $12.47 \pm 1.27$  | 21.12      | $79.42 \pm 4.52$                |
| 10    | 10     | 10min  | 16.22s  | $4.43 \pm 0.05$   | $35.05 \pm 1.45$  | 39.48      | N/A                             |
| 14    | 8      | 195min | 67.97s  | $109.97 \pm 2.05$ | $70.48 \pm 3.67$  | 180.45     | $707.0 \pm 27.55$               |
| 15    | 8      | 72min  | 79.36s  | $32.1 \pm 0.42$   | $30.77 \pm 6.28$  | 62.87      | $291.42 \pm 16.83$              |
| 16    | 8      | 198min | 134.07s | $133.1 \pm 2.28$  | $68.85 \pm 13.12$ | 201.95     | $1493.83 \pm 27.75$             |

1031 underestimated as well – merely making data more easily accessible right out-of-the-box, such as  
 1032 visual fields and live-heatmaps, has the potential to reveal features of group- and individual be-  
 1033 haviour which have not been visible before. TRex makes information on multiple timescales of  
 1034 events available simultaneously, and sometimes this is the only way to detect interesting proper-  
 1035 ties (e.g. trail formation in termites).

### 1036 Future extensions

1037 Since the software is already actively used within the Max Planck Institute of Animal Behavior, re-  
 1038 ported issues have been taken into consideration during development. However, certain theoretic-  
 1039 al, as well as practically observed, limitations remain:

- 1040 • Posture: While almost all shapes can be detected correctly (by adjusting parameters), some  
 1041 shapes – especially round shapes – are hard to interpret in terms of "tail" or "head". This  
 1042 means that only the other image alignment method (moments) can be used. However, it  
 1043 does introduce some limitations e.g. calculating visual fields is impossible.
- 1044 • Tracking: Predictions, if the wrong direction is assumed, might go really far away from where  
 1045 the object is. Objects are then "lost" for a fixed amount of time (parameter). This can be  
 1046 "fixed" by shortening this time-period, though this leads to different problems when the soft-  
 1047 ware does not wait long enough for individuals to reappear.
- 1048 • General: Barely visible individuals have to be tracked with the help of deep learning (e.g.  
 1049 using *Caelles et al. (2017)*) and a custom-made mask per video frame, prepared in an external  
 1050 program of the users choosing
- 1051 • Visual identification: All individuals have to be *visible* and *separate* at the same time, at least  
 1052 once, for identification to work at all. Visual identification, e.g. with very high densities of  
 1053 individuals, can thus be very difficult. This is a hard restriction to any software since find-  
 1054 ing consecutive global segments is the underlying principle for the successful recognition of  
 1055 individuals.

1056 We will continue updating the software, increasingly addressing the above issues (and likely  
 1057 others), as well as potentially adding new features. During development we noticed a couple of



1058 areas where improvements could be made, both theoretical and practical in nature. Specifically,  
1059 incremental improvements in analysis speed could be made regarding visual identification by us-  
1060 ing the trained network more sporadically – e.g. it is not necessary to predict every image of very  
1061 long consecutive segments, since, even with fewer samples, prediction values are likely to converge  
1062 to a certain value early on. A likely more potent change would be an improved "uniqueness" algo-  
1063 rithm, which, during the accumulation phase, is better at predicting which consecutive segment  
1064 will improve training results the most. This could be done, for example, by taking into account the  
1065 variation between images of the same individual. Other planned extensions include:

- 1066 • (Feature): We want to have a more general interface available to users, so they can create  
1067 their own plugins. Working with the data in live-mode, while applying their own filters. As  
1068 well as specifically being able to write a plugin that can detect different species/annotate  
1069 them in the video.
- 1070 • (Crossing solver): Additional method optimized for splitting overlapping, solid-color objects.  
1071 The current method, simply using a threshold, is effective for many species but often pro-  
1072 duces large holes when splitting objects consisting of largely the same color.

1073 To obtain the most up-to-date version of TRex, please download it at [trex.run](https://trex.run) or update your  
1074 existing installation according to our instructions listed on [trex.run/docs/install.html](https://trex.run/docs/install.html).

## 1075 Software and Licenses

1076 TRex is published under the GNU GPLv3 license (see [here](#) for permissions granted by GPLv3). All of  
1077 the code has been written by the first author of this paper (a few individual lines of code from other  
1078 sources have been marked inside the code). While none of these libraries are distributed alongside  
1079 TRex (they have to be provided separately), the following libraries are used: OpenCV ([opencv.org](https://opencv.org))  
1080 is a core library, used for all kinds of image manipulation. GLFW ([glfw.org](https://glfw.org)) helps with opening appli-  
1081 cation windows and maintaining graphics contexts, while DearImGui ([github.com/ocornut/imgui](https://github.com/ocornut/imgui))  
1082 helps with some more abstractions regarding graphics. `pybind11` ([Jakob et al. \(2017\)](#)) for Python  
1083 integration within a C++ environment. `miniLZO` ([oberhumer.com/opensource/lzo](https://oberhumer.com/opensource/lzo)) is used for com-  
1084 pression of PV frames. Optional bindings are available to FFMPEG ([ffmpeg.org](https://ffmpeg.org)) and `libpng` libraries,  
1085 if available. (optional) GNU Libmicrohttpd ([gnu.org/software/libmicrohttpd](https://gnu.org/software/libmicrohttpd)), if available, can be  
1086 used for an HTTP interface of the software, but is non-essential.

## 1087 Acknowledgments

1088 We thank A. Albi, F. Nowak, H. Hugo, D. E. Bath, F. Oberhauser, J. Graving, I. Etheredge, for helping  
1089 with their insights, by providing videos, for comments on the manuscript, testing the software  
1090 and for frequent coffee breaks during development. The development of this software would not  
1091 have been possible without them. IDC acknowledges support from the NSF (IOS-1355061), the  
1092 Office of Naval Research grant (ONR, N00014-19-1-2556), the Struktur- und Innovationsfonds für  
1093 die Forschung of the State of Baden-Württemberg, the Deutsche Forschungsgemeinschaft (DFG,  
1094 German Research Foundation) under Germany's Excellence Strategy-EXC 2117-422037984, and  
1095 the Max Planck Society.

## 1096 References

- 1097 **AbuBaker A**, Qahwaji R, Ipson S, Saleh M. One Scan Connected Component Labeling Technique. In:  
1098 *2007 IEEE International Conference on Signal Processing and Communications*; 2007. p. 1283-1286. doi:  
1099 <https://doi.org/10.1109/ICSPC.2007.4728561>.
- 1100 **Alarcón-Nieto G**, Graving JM, Klarevas-Irby JA, Maldonado-Chaparro AA, Mueller I, Farine DR. An automated  
1101 barcode tracking system for behavioural studies in birds. *Methods in Ecology and Evolution*. 2018; 9(6):1536-  
1102 1547. doi: <https://doi.org/10.1111/2041-210X.13005>.

- 1103 **Bath DE**, Stowers JR, Hörmann D, Poehlmann A, Dickson BJ, Straw AD. FlyMAD: rapid thermogenetic  
1104 control of neuronal activity in freely walking *Drosophila*. *Nature methods*. 2014; 11(7):756–762. doi:  
1105 <https://doi.org/10.1038/nmeth.2973>.
- 1106 **Bertsekas DP**. A new algorithm for the assignment problem. *Mathematical Programming*. 1981; 21(1):152–171.  
1107 doi: <https://doi.org/10.1007/BF01584237>.
- 1108 **Bianco IH**, Engert F. Visuomotor transformations underlying hunting behavior in zebrafish. *Current biology*.  
1109 2015; 25(7):831–846. doi: <https://doi.org/10.1016/j.cub.2015.01.042>.
- 1110 **Bilotta J**, Saszik S. The zebrafish as a model visual system. *International Journal of Developmental Neuro-*  
1111 *science*. 2001; 19(7):621–629. doi: [https://doi.org/10.1016/S0736-5748\(01\)00050-8](https://doi.org/10.1016/S0736-5748(01)00050-8).
- 1112 **Bonter DN**, Bridge ES. Applications of radio frequency identification (RFID) in ornithological research: a review.  
1113 *Journal of Field Ornithology*. 2011; 82(1):1–10. doi: <https://doi.org/10.1111/j.1557-9263.2010.00302.x>.
- 1114 **Branson K**, Robie AA, Bender J, Perona P, Dickinson MH. High-throughput ethomics in large groups of  
1115 *Drosophila*. *Nature methods*. 2009; 6(6):451–457. doi: <https://doi.org/10.1038/nmeth.1328>.
- 1116 **Brembs B**, Heisenberg M. The operant and the classical in conditioned orientation of *Drosophila melanogaster*  
1117 at the flight simulator. *Learning & Memory*. 2000; 7(2):104–115. doi: [10.1101/lm.7.2.104](https://doi.org/10.1101/lm.7.2.104).
- 1118 **Burgos-Artizzu XP**, Dollár P, Lin D, Anderson DJ, Perona P. Social behavior recognition in continuous  
1119 video. In: *2012 IEEE Conference on Computer Vision and Pattern Recognition IEEE*; 2012. p. 1322–1329. doi:  
1120 <https://doi.org/10.1109/CVPR.2012.6247817>.
- 1121 **Caelles S**, Maninis KK, Pont-Tuset J, Leal-Taixé L, Cremers D, Van Gool L. One-Shot Video Object Segmentation.  
1122 In: *Computer Vision and Pattern Recognition (CVPR)*; 2017. .
- 1123 **Cavagna A**, Cimarelli A, Giardina I, Parisi G, Santagati R, Stefanini F, Tavarone R. From empirical data to inter-  
1124 individual interactions: unveiling the rules of collective animal behavior. *Mathematical Models and Methods*  
1125 *in Applied Sciences*. 2010; 20(supp01):1491–1510.
- 1126 **Chang F**, Chen C. A Component-Labeling Algorithm Using Contour Tracing Technique. In: *2013 12th In-*  
1127 *ternational Conference on Document Analysis and Recognition*, vol. 3 Los Alamitos, CA, USA: IEEE Computer  
1128 Society; 2003. p. 741. <https://doi.ieeecomputersociety.org/10.1109/ICDAR.2003.1227760>, doi: [10.1109/IC-](https://doi.org/10.1109/ICDAR.2003.1227760)  
1129 [DAR.2003.1227760](https://doi.org/10.1109/ICDAR.2003.1227760).
- 1130 **Clausen J**. Branch and bound algorithms-principles and examples. Department of Computer Science, Univer-  
1131 sity of Copenhagen. 1999; p. 1–30.
- 1132 **Colavita FB**. Human sensory dominance. *Perception & Psychophysics*. 1974; 16(2):409–412. doi:  
1133 <https://doi.org/10.3758/BF03203962>.
- 1134 **Crall JD**, Gravish N, Mountcastle AM, Combes SA. BEETag: a low-cost, image-based track-  
1135 ing system for the study of animal behavior and locomotion. *PloS one*. 2015; 10(9). doi:  
1136 <https://doi.org/10.1371/journal.pone.0136487>.
- 1137 **Dell AI**, Bender JA, Branson K, Couzin ID, de Polavieja GG, Noldus LP, Pérez-Escudero A, Perona P, Straw AD,  
1138 Wikelski M, et al. Automated image-based tracking and its application in ecology. *Trends in ecology & evolu-*  
1139 *tion*. 2014; 29(7):417–428. doi: <https://doi.org/10.1016/j.tree.2014.05.004>.
- 1140 **Francisco FA**, Nührenberg P, Jordan AL. A low-cost, open-source framework for tracking and behavioural  
1141 analysis of animals in aquatic ecosystems. *bioRxiv*. 2019; p. 571232. doi: <https://doi.org/10.1101/571232>.
- 1142 **Fredman ML**, Tarjan RE. Fibonacci heaps and their uses in improved network optimization algorithms. *Journal*  
1143 *of the ACM (JACM)*. 1987; 34(3):596–615. doi: <https://doi.org/10.1145/28869.28874>.
- 1144 **Fukunaga T**, Kubota S, Oda S, Iwasaki W. GroupTracker: video tracking system for multiple an-  
1145 imals under severe occlusion. *Computational biology and chemistry*. 2015; 57:39–45. doi:  
1146 <https://doi.org/10.1016/j.compbiolchem.2015.02.006>.
- 1147 **Fukushima K**. Neocognitron: A hierarchical neural network capable of visual pattern recognition. *Neural*  
1148 *networks*. 1988; 1(2):119–130. doi: [https://doi.org/10.1016/0893-6080\(88\)90014-7](https://doi.org/10.1016/0893-6080(88)90014-7).
- 1149 **Garrido-Jurado S**, Muñoz-Salinas R, Madrid-Cuevas FJ, Medina-Carnicer R. Generation of fiducial marker  
1150 dictionaries using mixed integer linear programming. *Pattern Recognition*. 2016; 51:481–491. doi:  
1151 <https://doi.org/10.1016/j.patcog.2015.09.023>.

- 1152 **Glorot X**, Bengio Y. Understanding the difficulty of training deep feedforward neural networks. In: Teh YW,  
1153 Titterton M, editors. *Proceedings of the Thirteenth International Conference on Artificial Intelligence and Statis-*  
1154 *tics*, vol. 9 of Proceedings of Machine Learning Research Chia Laguna Resort, Sardinia, Italy: PMLR; 2010. p.  
1155 249–256. <http://proceedings.mlr.press/v9/glorot10a.html>.
- 1156 **Graving JM**, Chae D, Naik H, Li L, Koger B, Costelloe BR, Couzin ID. DeepPoseKit, a software toolkit for fast and  
1157 robust animal pose estimation using deep learning. *Elife*. 2019; 8:e47994.
- 1158 **He L**, Chao Y, Suzuki K, Wu K. Fast connected-component labeling. *Pattern recognition*. 2009; 42(9):1977–1987.  
1159 doi: <https://doi.org/10.1016/j.patcog.2008.10.013>.
- 1160 **Hewitt BM**, Yap MH, Hodson-Tole EF, Kennerley AJ, Sharp PS, Grant RA. A novel automated rodent tracker  
1161 (ART), demonstrated in a mouse model of amyotrophic lateral sclerosis. *Journal of neuroscience methods*.  
1162 2018; 300:147–156. doi: <https://doi.org/10.1016/j.jneumeth.2017.04.006>.
- 1163 **Hu MK**. Visual pattern recognition by moment invariants. *IRE transactions on information theory*. 1962;  
1164 8(2):179–187. doi: <https://doi.org/10.1109/TIT.1962.1057692>.
- 1165 **Hubel DH**, Wiesel TN. Receptive fields of single neurons in the cat's striate cortex. *The Journal of physiology*.  
1166 1959; 148(3):574. doi: [10.1113/jphysiol.1959.sp006308](https://doi.org/10.1113/jphysiol.1959.sp006308).
- 1167 **Hubel DH**, Wiesel TN. Receptive fields of cells in striate cortex of very young, visually inexperienced kittens.  
1168 *Journal of neurophysiology*. 1963; 26(6):994–1002. doi: <https://doi.org/10.1152/jn.1963.26.6.994>.
- 1169 **Hughey LF**, Hein AM, Strandburg-Peshkin A, Jensen FH. Challenges and solutions for studying collective animal  
1170 behaviour in the wild. *Philosophical Transactions of the Royal Society B: Biological Sciences*. 2018;  
1171 373(1746):20170005. doi: <https://doi.org/10.1098/rstb.2017.0005>.
- 1172 **Humphrey GK**, Khan SC. Recognizing novel views of three-dimensional objects. *Canadian Journal of Psychol-*  
1173 *ogy/Revue canadienne de psychologie*. 1992; 46(2):170. doi: <https://doi.org/10.1037/h0084320>.
- 1174 **Inada Y**, Kawachi K. Order and flexibility in the motion of fish schools. *Journal of theoretical Biology*. 2002;  
1175 214(3):371–387.
- 1176 **Iwata H**, Ebana K, Uga Y, Hayashi T. Genomic prediction of biological shape: elliptic fourier analysis and kernel  
1177 partial least squares (PLS) regression applied to grain shape prediction in rice (*Oryza sativa* L.). *PloS one*.  
1178 2015; 10(3). doi: <https://doi.org/10.1371/journal.pone.0120610>.
- 1179 **Jakob W**, Rhineland J, Moldovan D, pybind11 – Seamless operability between C++11 and Python; 2017.  
1180 <https://github.com/pybind/pybind11>.
- 1181 **Kalman RE**. A new approach to linear filtering and prediction problems. . 1960; doi:  
1182 <https://doi.org/10.1115/1.3662552>.
- 1183 **Kingma DP**, Ba J. Adam: A method for stochastic optimization. arXiv preprint arXiv:1412.6980. 2014; .
- 1184 **Kuhl FP**, Giardina CR. Elliptic Fourier features of a closed contour. *Computer graphics and image processing*.  
1185 1982; 18(3):236–258. doi: [https://doi.org/10.1016/0146-664X\(82\)90034-X](https://doi.org/10.1016/0146-664X(82)90034-X).
- 1186 **Kuhn HW**. The Hungarian method for the assignment problem. *Naval research logistics quarterly*. 1955; 2(1-  
1187 2):83–97. doi: <https://doi.org/10.1002/nav.3800020109>.
- 1188 **Land A**, Doig A. An automatic method of solving discrete programming problems, *Econometrica*, Vol. 28, No.  
1189 3. . 1960; .
- 1190 **LeCun Y**, Boser B, Denker JS, Henderson D, Howard RE, Hubbard W, Jackel LD. Backpropaga-  
1191 tion applied to handwritten zip code recognition. *Neural computation*. 1989; 1(4):541–551. doi:  
1192 <https://doi.org/10.1162/neco.1989.1.4.541>.
- 1193 **Lin TY**, Goyal P, Girshick R, He K, Dollár P. Focal loss for dense object detection. In: *Proceedings of the IEEE*  
1194 *international conference on computer vision*; 2017. p. 2980–2988.
- 1195 **Little JD**, Murty KG, Sweeney DW, Karel C. An algorithm for the traveling salesman problem. *Operations*  
1196 *research*. 1963; 11(6):972–989. doi: <https://doi.org/10.1287/opre.11.6.972>.
- 1197 **Liu T**, Chen W, Xuan Y, Fu X. The effect of object features on multiple object tracking and identification. In:  
1198 *International Conference on Engineering Psychology and Cognitive Ergonomics* Springer; 2009. p. 206–212. doi:  
1199 [https://doi.org/10.1007/978-3-642-02728-4\\_22](https://doi.org/10.1007/978-3-642-02728-4_22).

- 1200 **Maninis KK**, Caelles S, Chen Y, Pont-Tuset J, Leal-Taixé L, Cremers D, Van Gool L. Video Object Segmentation  
1201 Without Temporal Information. *IEEE Transactions on Pattern Analysis and Machine Intelligence (TPAMI)*.  
1202 2018; doi: <https://doi.org/10.1109/TPAMI.2018.2838670>.
- 1203 **Mathis A**, Mamidanna P, Cury KM, Abe T, Murthy VN, Mathis MW, Bethge M. DeepLabCut: markerless pose  
1204 estimation of user-defined body parts with deep learning. *Nature neuroscience*. 2018; 21(9):1281–1289.
- 1205 **Mersch DP**, Crespi A, Keller L. Tracking individuals shows spatial fidelity is a key regulator of ant social organi-  
1206 zation. *Science*. 2013; 340(6136):1090–1093. doi: [10.1126/science.1234316](https://doi.org/10.1126/science.1234316).
- 1207 **Munkres J**. Algorithms for the assignment and transportation problems. *Journal of the society for industrial*  
1208 *and applied mathematics*. 1957; 5(1):32–38. doi: <https://doi.org/10.1137/0105003>.
- 1209 **Nagy M**, Vászrhelyi G, Pettit B, Roberts-Mariani I, Vicsek T, Biro D. Context-dependent hierarchies  
1210 in pigeons. *Proceedings of the National Academy of Sciences*. 2013; 110(32):13049–13054. doi:  
1211 <https://doi.org/10.1073/pnas.1305552110>.
- 1212 **Noldus LP**, Spink AJ, Tegelenbosch RA. EthoVision: a versatile video tracking system for automation of be-  
1213 havioral experiments. *Behavior Research Methods, Instruments, & Computers*. 2001; 33(3):398–414. doi:  
1214 <https://doi.org/10.3758/BF03195394>.
- 1215 **Ohayon S**, Avni O, Taylor AL, Perona P, Egnor SR. Automated multi-day tracking of marked mice  
1216 for the analysis of social behaviour. *Journal of neuroscience methods*. 2013; 219(1):10–19. doi:  
1217 <https://doi.org/10.1016/j.jneumeth.2013.05.013>.
- 1218 **Pennekamp F**, Schtickzelle N, Petchey OL. BEMOVI, software for extracting behavior and morphology  
1219 from videos, illustrated with analyses of microbes. *Ecology and Evolution*. 2015; 5(13):2584–2595. doi:  
1220 <https://doi.org/10.1002/ece3.1529>.
- 1221 **Perez L**, Wang J. The effectiveness of data augmentation in image classification using deep learning. *arXiv*  
1222 *preprint arXiv:171204621*. 2017; .
- 1223 **Pérez-Escudero A**, de Polavieja G. Collective animal behavior from Bayesian estimation and probability match-  
1224 ing. *Nature Precedings*. 2011; p. 1–1.
- 1225 **Pesant G**, Quimper CG, Zanarini A. Counting-based search: Branching heuristics for constraint satisfaction  
1226 problems. *Journal of Artificial Intelligence Research*. 2012; 43:173–210.
- 1227 **Pérez-Escudero A**, Vicente-Page J, Hinz RC, Arganda S, de Polavieja GG. idTracker: tracking individuals  
1228 in a group by automatic identification of unmarked animals. *Nature methods*. 2014; 11(7):743. doi:  
1229 <https://doi.org/10.1038/nmeth.2994>.
- 1230 **Ramshaw L**, Tarjan RE. On minimum-cost assignments in unbalanced bipartite graphs. HP Labs, Palo Alto, CA,  
1231 USA, Tech Rep HPL-2012-40R1. 2012; .
- 1232 **Ramshaw L**, Tarjan RE. A weight-scaling algorithm for min-cost imperfect matchings in bipartite graphs. In:  
1233 *2012 IEEE 53rd Annual Symposium on Foundations of Computer Science IEEE*; 2012. p. 581–590.
- 1234 **Rasch MJ**, Shi A, Ji Z. Closing the loop: tracking and perturbing behaviour of individuals in a group in real-time.  
1235 *bioRxiv*. 2016; p. 071308. doi: <https://doi.org/10.1101/071308>.
- 1236 **Risse B**, Berh D, Otto N, Klämbt C, Jiang X. FIMTrack: An open source tracking and locomotion  
1237 analysis software for small animals. *PLoS computational biology*. 2017; 13(5):e1005530. doi:  
1238 <https://doi.org/10.1371/journal.pcbi.1005530>.
- 1239 **Robie AA**, Seagraves KM, Egnor SR, Branson K. Machine vision methods for analyzing social interactions. *Journal*  
1240 *of Experimental Biology*. 2017; 220(1):25–34. doi: <https://doi.org/10.1242/jeb.142281>.
- 1241 **Rodriguez A**, Zhang H, Klaminder J, Brodin T, Andersson PL, Andersson M. ToxTrac: a fast and ro-  
1242 bust software for tracking organisms. *Methods in Ecology and Evolution*. 2018; 9(3):460–464. doi:  
1243 <https://doi.org/10.1111/2041-210X.12874>.
- 1244 **Romero-Ferrero F**, Bergomi MG, Hinz RC, Heras FJ, de Polavieja GG. idtracker.ai: tracking all indi-  
1245 viduals in small or large collectives of unmarked animals. *Nature methods*. 2019; 16(2):179. doi:  
1246 <https://doi.org/10.1038/s41592-018-0295-5>.

- 1247 **Rosenthal SB**, Twomey CR, Hartnett AT, Wu HS, Couzin ID. Revealing the hidden networks of interaction in mo-  
1248 bile animal groups allows prediction of complex behavioral contagion. *Proceedings of the National Academy*  
1249 *of Sciences*. 2015; 112(15):4690–4695. doi: <https://doi.org/10.1073/pnas.1420068112>.
- 1250 **Sridhar VH**, Roche DG, Gingins S. Tracktor: Image-based automated tracking of animal movement and  
1251 behaviour. *Methods in Ecology and Evolution*. 2019; 10(6):815–820. doi: <https://doi.org/10.1111/2041-210X.13166>.
- 1253 **Strandburg-Peshkin A**, Twomey CR, Bode NW, Kao AB, Katz Y, Ioannou CC, Rosenthal SB, Torney CJ, Wu HS,  
1254 Levin SA, et al. Visual sensory networks and effective information transfer in animal groups. *Current Biology*.  
1255 2013; 23(17):R709–R711. doi: <https://doi.org/10.1016/j.cub.2013.07.059>.
- 1256 **Suzuki K**, Horiba I, Sugie N. Linear-time connected-component labeling based on sequential local opera-  
1257 tions. *Computer Vision and Image Understanding*. 2003; 89(1):1–23. doi: [https://doi.org/10.1016/S1077-3142\(02\)00030-9](https://doi.org/10.1016/S1077-3142(02)00030-9).
- 1259 **Thomas DJ**. Matching Problems with Additional Resource Constraints. . 2015; doi:  
1260 <https://doi.org/10.25353/ubtr-xxxx-7644-a670/>.
- 1261 **Warren J**, Weimer H. *Subdivision methods for geometric design: A constructive approach*. Elsevier; 2001.
- 1262 **Wiesel TN**, Hubel DH. Spatial and chromatic interactions in the lateral geniculate body of the rhesus monkey.  
1263 *Journal of neurophysiology*. 1966; 29(6):1115–1156. doi: <https://doi.org/10.1152/jn.1966.29.6.1115>.
- 1264 **Williams L**. Casting curved shadows on curved surfaces. In: *Proceedings of the 5th annual conference on Com-*  
1265 *puter graphics and interactive techniques*; 1978. p. 270–274. doi: <https://doi.org/10.1145/800248.807402>.
- 1266 **Zhang W**. *Branch-and-Bound Search Algorithms and Their Computational Complexity*. UNIVERSITY OF SOUTH-  
1267 ERN CALIFORNIA MARINA DEL REY INFORMATION SCIENCES INST; 1996.



## 1268 Appendix 1

### 1269 Interface and installation requirements

1270 While all options are available from the command-line and a screen is not required, TRex  
1271 offers a rich, yet straight-forward to use, interface to local as well as remote users. Accom-  
1272 panied by the integrated documentation for all parameters, each stating purpose, type and  
1273 value ranges, as well as a comprehensive online documentation, the learning curve for new  
1274 users is usually quite steep. Especially to the benefit of new users, we evaluated the pa-  
1275 rameter space on a wide dataset (fish, termites, locusts) and determined which parameters  
1276 work best in most use-cases to set their default values (evaluation not part of this paper).

1277 Compiled, read-to-use binaries are available for all major operating systems (Windows,  
1278 Linux, MacOS). However, it should be possible to compile the software yourself for any Unix-  
1279 or Windows-based system ( $\geq 8$ ), possibly with minor adjustments. Tested setups include:

- 1280 • Windows, Linux, MacOS
- 1281 • A computer with  $\geq 16$ GB RAM is recommended
- 1282 • OpenCV<sup>a</sup> libraries  $\geq v3.3$
- 1283 • Python libraries  $\geq v3.6$ , as well as additional packages such as:
  - 1284 • Keras  $\approx v2.2$  with one of the following backends installed
  - 1285 - Tensorflow  $< v2^b$  (either CPU-based, or GPU-based)
  - 1286 - Theano<sup>c</sup>
- 1287 • GPU-based recognition requires an NVIDIA graphics-card and drivers (see Tensorflow  
1288 documentation)

1289 For detailed download/installation instructions and up-to-date requirements, please re-  
1290 fer to the documentation at [trex.run/install](http://trex.run/install).

1291 The interface is structured into groups (see Figure A1), categorized by the typical use-  
1292 case:

- 1293 1. The main menu, containing options for loading/saving, options for the timeline and  
1294 reanalysis of parts of the video
- 1295 2. Timeline and current video playback information
- 1296 3. Information about the selected individual
- 1297 4. Display options and an interactive "omni-box" for viewing and changing parameters
- 1298 5. General status information about TRex and the Python integration

### 1299 Workflow

1300 TRex can be opened in one of two ways: (i) Simply starting the application (e.g. using the  
1301 operating systems' file-browser), (ii) using the command-line. If the user simply opens the  
1302 application, a file opening dialog displays a list of compatible files as well as information on  
1303 a selected files content. Certain startup parameters can be adjusted from within the graph-  
1304 ical user-interface, before confirming and loading up the file (see Figure A3). Users with  
1305 more command-line experience, or the intent of running TRex in batch-mode, can append  
1306 necessary parameter values without adding them to a settings file.

To acquire video-files that can be opened using TRex, one needs to first run TGrabs in  
one way or another. It is possible to use a webcam (generic USB camera) for recording, but  
TGrabs can also be compiled with Basler Pylon5 support<sup>d</sup>. TGrabs can also convert existing  
videos and write to a more suitable format for TRex to interact with (a static background  
with moving objects clearly separated in front of it). It can be started just like TRex, although

1307

1308

1309

1310

1311

1312

1313

1314

1315

1316

1317

1318

1319

1320

1321

1322

1323

1324

1325

1326

1327

1328

1329

1330

1331

1332

1333

1334

1335

1336

1337

1338

1339

1340

1341

1342

1343

1344

1345

1346

1347

1348

1349

1350

1351

1352

1353

1354

1355

1356

1357

most options are either set via the command-line, or a web-interface. TGrabs can perform basic tracking tasks on the fly, offering closed-loop support as well.

For automatic visual recognition, one might need to adjust some parameters. Mostly, these adjustments consist of changing the following parameters:

- `blob_size_ranges`: Setting one (or multiple) size thresholds for individuals, by giving lower and upper limit value pairs.
- `track_max_individuals`: Sets the number of individuals expected in a trial. This number needs to be known for recognition tasks (and will be guessed if not provided), but can be set to 0 for unknown numbers of individuals.
- `track_max_speed`: Sets the maximum speed (cm/s) that individuals are expected to travel at. This is influenced by meta information provided to TGrabs by the user (e.g. the width of the tank), as well as frame timings.
- `track_threshold`: Even TRex can threshold images of individuals, so it is beneficial to not threshold away too many pixels during conversion/recording and do finer-grade adjustments in the tracker itself.
- `outline_resample`: A factor that is  $> 0$ , by which the number of points in the outline is essentially "divided". Smaller resample rates lead to more points on the outline (good for very small shapes).

Training can be started once the user is satisfied with the basic tracking results. Consecutive segments are highlighted in the time-line and suggest better or worse tracking, based on their quantity and length. Problematic segments of the video are highlighted using yellow bars in that same time-line, giving another hint to the user as to the tracking quality. To start the training, the user just clicks on "train network" in the main menu – triggering the accumulation process immediately. After training, the user can click on "auto correct" in the menu and let TRex correct the tracks automatically (this will re-track the video). The entire process can be automated by adding the "auto\_train" parameter to the command-line, or selecting it in the interface.

## Output

Once finished, the user may export the data in the desired format. Which parts of the data are exported is up to the user as well. By default, almost all the data is exported and saved in NPZ files in the output folder.

Output folders are structured in this way:

- **output** folder:
  - Settings files
  - Training weights
  - Saved program states
  - **data** folder:
    - \* Statistics
    - \* All exported NPZ files (named `[video_name]_fish[number].npz` – the prefix "fish" can be changed).
    - \* ...
  - **frames** folder (contains video clips recorded in the GUI, e.g. for presentations):
    - \* **[video name]** folder
      - `clip[index].avi`
      - ...
    - \* ...

1358  
1359  
  
1360  
1361  
1362  
  
1363  
1364  
1365  
1366  
1367  
1368  
1369  
1370  
1371  
1372  
1373  
1374  
1375  
1376  
1377  
1378  
1379  
1380  
1381  
1382  
1383  
1384  
1385  
1386  
1387  
1388  
1389  
1390  
1391  
1392  
1393  
1394  
1395  
1396  
1397  
  
1398  
1399  
1400  
1401

At any point in time (except during training), the user can save the current program state and return to it at a later time (e.g. after a computer restart).

### Export options

After individuals have been assigned by the matching algorithm, various metrics are calculated (depending on settings):

- **Angle:** The angle of an individual can be calculated without any context using image moments (*Hu (1962)*). However, this angle is only reliable within 0 to 180 degrees – not the full 360. Within these 180 degrees it is probably more accurate than is movement direction.
- **Position:** Centroid information on the current, as well as the previous position of the individual are maintained. Based on previous positions, velocity as well as acceleration are calculated. This process is based on information sourced from the respective video file or camera on the time passed between frames. The centroid of an individual is calculated based on the mass center of the pixels that the object comprises. Angles calculated in the previous steps are corrected (flipped by 180 degrees) if the angle difference between movement direction and angle + 180 degrees is smaller than with the raw angle.
- **Posture:** A large part of the computational complexity comes from calculating the posture of individuals. While this process is relatively fast in TRex, it is still the main factor (except with many individuals, where the matching process takes longest). We dedicated a subsection to it below.
- **Visual Field:** Based on posture, rays can be cast to detect which animal is visible from the position of another individual. We also dedicated a subsection to visual field further down.
- **Other** features can be computed, such as inter-individual distances or distance to the tank border. These are optional and will only be computed if necessary when exporting the data. A (non-comprehensive) list of metrics that can be exported follows:
  - Time: The time of the current frame (relative to the start of the video) in seconds.
  - Frame: Index of the frame in the PV video file.
  - Individual components of position its derivatives (as well as their magnitudes, e.g. speed)
  - Midline offset: The center-line, e.g. of a beating fish-tail, is normalized to be roughly parallel to the x-axis (from its head to a user-defined percentage of a body). The y-offset of its last point is exported as a "midline offset". This is useful, e.g. to detect burst-and-glide events.
  - Midline variance: Variance in midline offset, e.g. for detection of irregular postures or increased activity.
  - Border distance
  - Average neighbour distance: Could be used to detect individuals who prefer to be located far away from the others or are avoided by them.

Additionally, tracks of individuals can be exported as a series of cropped-out images – a very useful tool if they are to be used with an external posture estimator or tag-recognition. This series of images can be either every single image, or the median of multiple images (the time-series is down-sampled).

<sup>a</sup>[opencv.org](https://opencv.org)

<sup>b</sup>[tensorflow.org](https://tensorflow.org)

<sup>c</sup>[deeplearning.net](https://deeplearning.net)

<sup>d</sup>The [baslerweb.com](https://baslerweb.com) Pylon SDK is required to be installed to support Basler USB cameras.

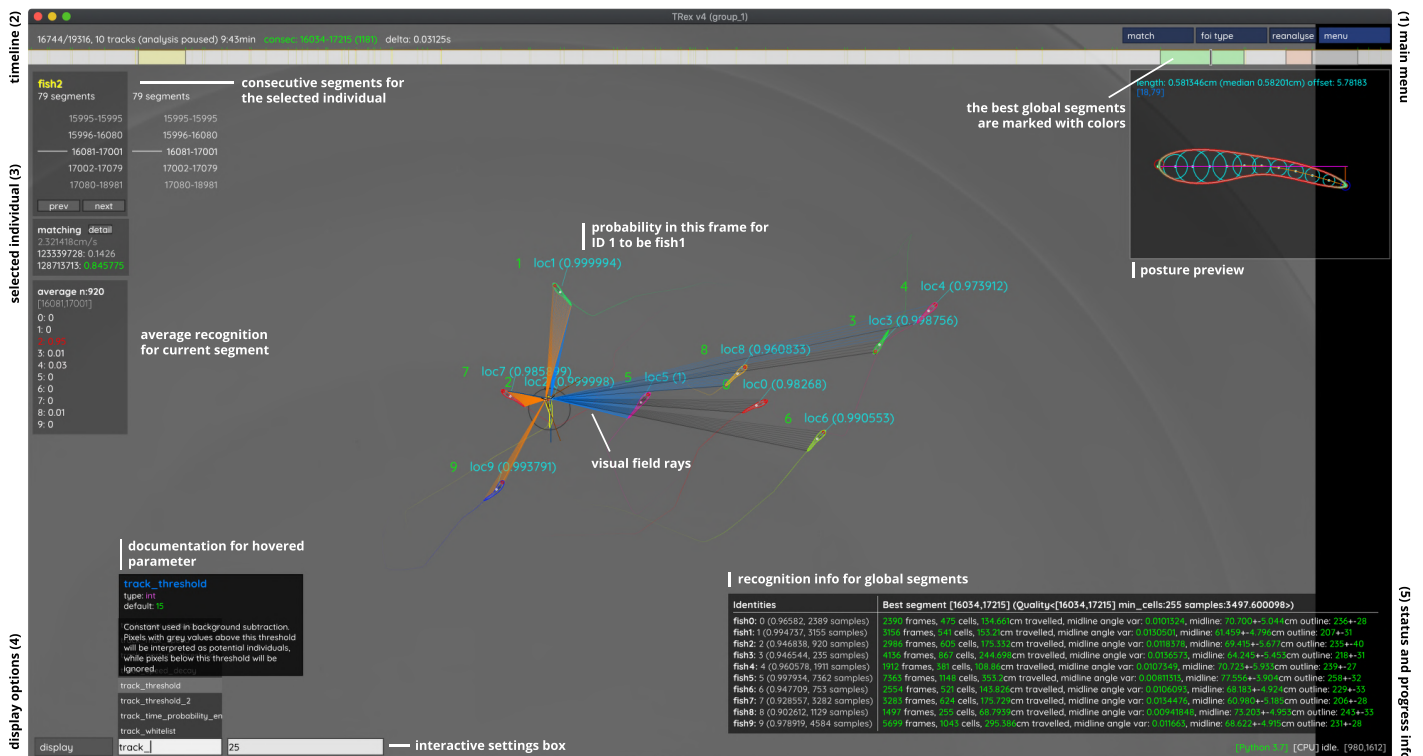

**Appendix 1 Figure A1.** An overview of TRex' the main interface, which is part of the documentation at [trex.run/docs](http://trex.run/docs). Interface elements are sorted into categories in the four corners of the screen (labelled here in black). The omni-box on the bottom left corner allows users to change parameters on-the-fly, helped by a live auto-completion and documentation for all settings. Only some of the many available features are displayed here. Generally, interface elements can be toggled on or off using the bottom-left display options or moved out of the way with the cursor. Users can customize the tinting of objects (e.g. sourcing it from their speed) to generate interesting effect and can be recorded for use in presentations. Additionally, all exportable metrics (such as border-distance, size, x/y, etc.) can also be shown as an animated graph for a number of selected objects. Keyboard shortcuts are available for select features such as loading, saving, and terminating the program. Remote access is supported and offers the same graphical user interface, e.g. in case the software is executed without an application window (for batch processing purposes).

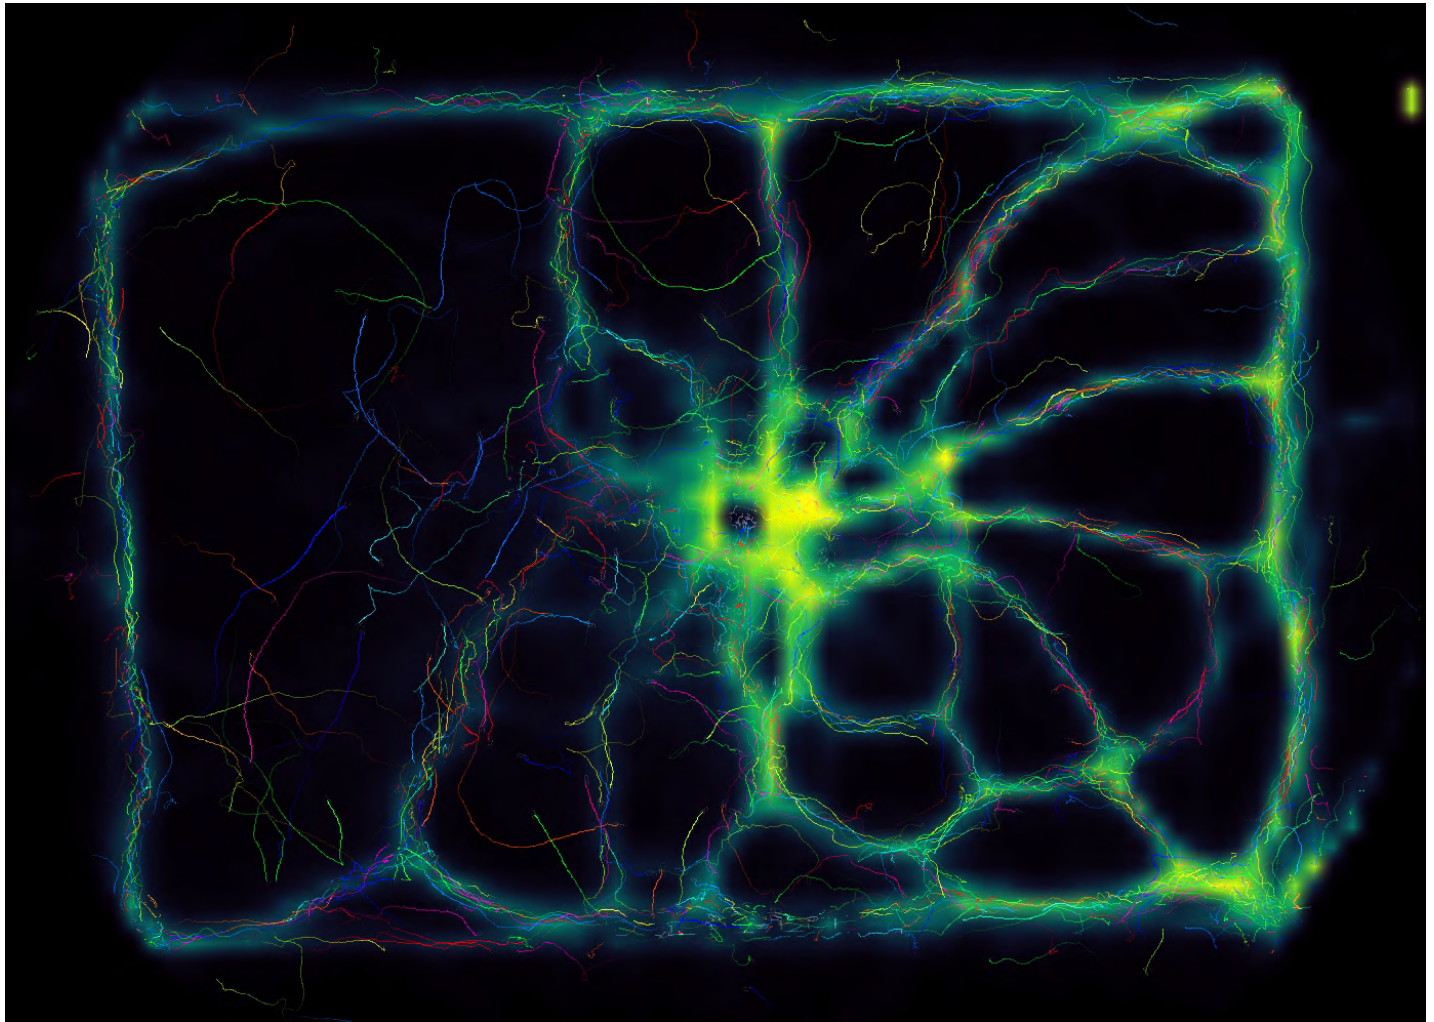

**Appendix 1 Figure A2.** Using the interactive heatmap generator within TRex, the foraging trail formation of *Constrictotermes cyphergaster* (termites) can be visualized during analysis, as well as other potentially interesting metrics (based on posture- as well basic positional data). This is generalizable to all output data fields available in TRex, e.g. also making it possible to visualize "time" as a heatmap and showing where individuals were more likely to be located during the beginning or towards end of the video. *Video: H. Hugo*



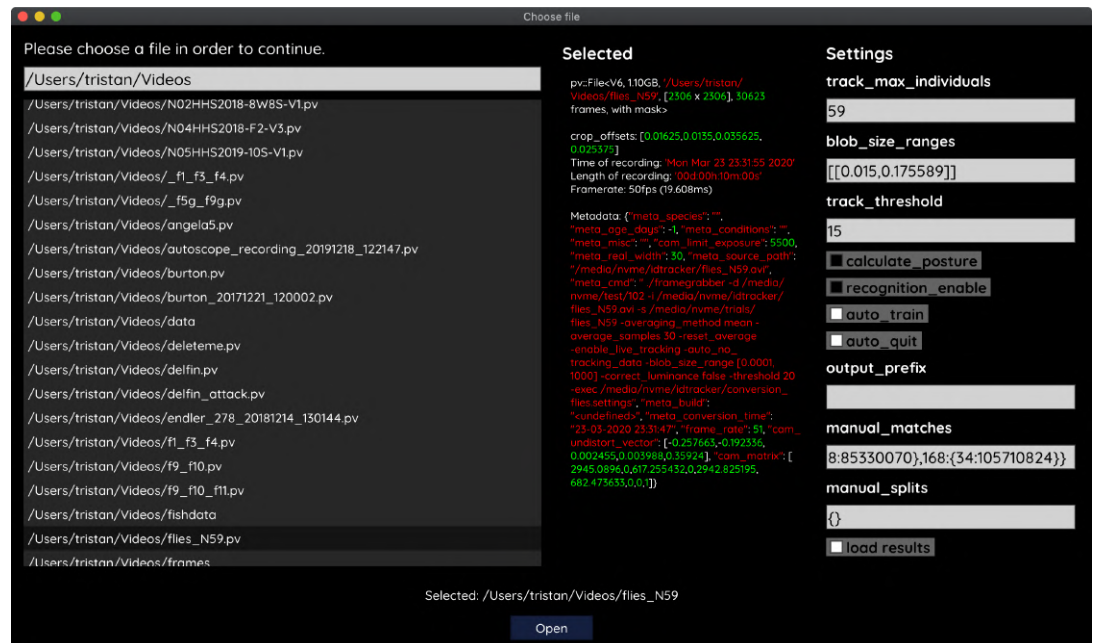

**Appendix 1 Figure A3.** The file opening dialog. On the left is a list of compatible files in the current folder. The center column shows meta-information provided by the video file, including its frame-rate and resolution – or some of the settings used during conversion and the timestamp of conversion. The column on the right provides an easy interface for adjusting the most important parameters before starting up the software. Most parameters can be changed later on from within TRex as well.

## 1402 Appendix 2

### 1403 From video frame to blobs

1404 Video frames can originate either from a camera, or from a pre-recorded video file saved  
1405 on disk. TGrabs treats both sources equally, the only exception being some minor details  
1406 and that pre-recorded videos have a well-defined end (which only has an impact on MP4  
1407 encoding). Multiple formats are supported, but the full list of supported codecs depends  
1408 on the specific system and OpenCV version installed. TGrabs saves images in RAW quality,  
1409 but does not store complete images. Merely the objects of interest, defined by common  
1410 tracking parameters such as size, will actually be written to a file. Since TGrabs is mostly  
1411 meant for use with stable backgrounds (except when contrast is good or a video-mask is  
1412 provided), the rest of the area can be approximated by a static background image generated  
1413 in the beginning of the process (or previously).

1414 Generally, every image goes through a number of steps before it can be tracked in TRex:

- 1415 1. Images are decoded by either (i) a camera driver, or (ii) OpenCV. They consist of an  
1416 array of values between 0 and 255 (grayscale). Color images will be converted to  
1417 grayscale images (color channel or "hue" can be chosen).
- 1418 2. Timing information is saved and images are appended to a queue of images to be  
1419 processed
- 1420 3. All operations from now on are performed on the GPU if available. Once images are  
1421 in the queue, they are picked one-by-one by the processing thread, which performs  
1422 operations on them based on user-defined parameters:
  - 1423 • Cropping
  - 1424 • Inverting
  - 1425 • Contrast/brightness and lighting corrections
  - 1426 • Undistortion (see OpenCV [Tutorial](#))
- 1427 4. (optional) Background subtraction ( $d(x) = b(x) - f(x)$ , with  $f$  being the image and  $b$  the  
1428 background image), leaving a difference image containing only the objects. This can  
1429 be an absolute difference  $|b(x) - f(x)|$  or a signed one, which has different effects on  
1430 the following step. Otherwise  $d(x) = f(x)$
- 1431 5. Thresholding to obtain a binary image, with all pixels either being 1 or 0:

$$1432 \quad t(x) = \begin{cases} 0 & d(x) < T \\ 1 & d(x) \geq T \end{cases}$$

1433 where  $0 \leq T \leq 255$  is the threshold constant.

- 1434 6. Options are available for further adjustment of the binary image: Dilation, Erosion and  
1435 Closing are used to close gaps in the shapes, which are filled up by successive dilation  
1436 and erosion operations (see Figure A1). If there is an imbalance of dilation and erosion  
1437 commands, noise can be removed or shapes made more inclusive.
- 1438 7. The original image is multiplied by the thresholded image, obtaining a masked grayscale  
1439 image:  $t(x) \cdot f(x)$ , where  $\cdot$  is the element-wise multiplication operator.

1440 At this point, the masked image is returned to the CPU, where connected components  
1441 (objects) are detected. A connected component is a number of adjacent pixels with color  
values greater than zero. Algorithms for connected-component labeling either use a 4-  
neighborhood or an 8-neighborhood, which considers diagonal neighbors to be adjacent  
as well. Many such algorithms are available (*AbuBaker et al. (2007)*, *Chang and Chen (2003)*,

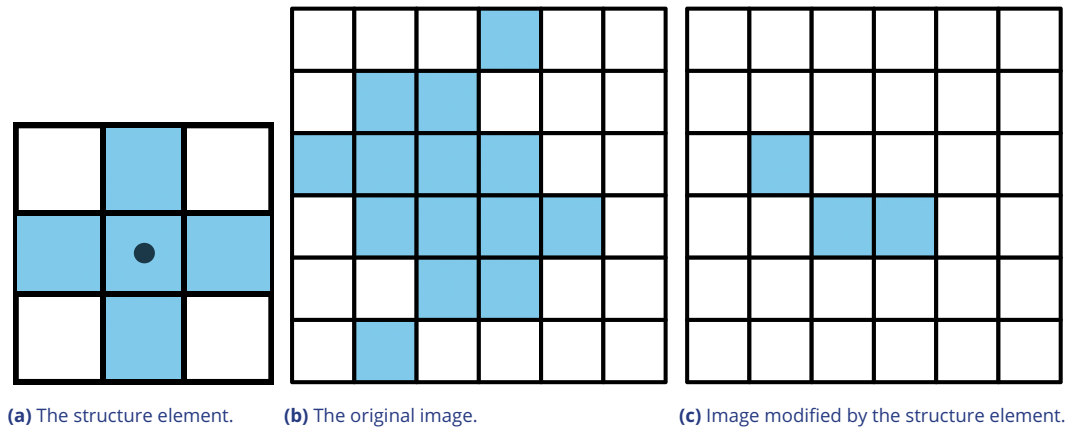

**Appendix 2 Figure A1.** Example of morphological operations on images: "Erosion". Blue pixels denote on-pixels with color values greater than zero, white pixels are "off-pixels" with a value equal to zero. A mask is moved across the original image, with its center (dot) being the focal pixel. A focal pixel is *retained* if all of the on-pixels within the structure element/mask are on top of on-pixels in the original image. Otherwise the focal pixel is set to 0. The type of operation performed is entirely determined by the structure element.

1442

1443

1444

1445

1446

1447

1448

1449

1450

1451

1452

1453

1454

1455

1456

1457

1458

1459

1460

1461

and many others), even capable of real-time speeds (*Suzuki et al. (2003), He et al. (2009)*). However, since we want to use a compressed representation throughout our solution, as well as transfer over valuable information to integrate it with posture analysis, we needed to implement our own (see Connected components algorithm).

MP4 encoding has some special properties, since its speed is mainly determined by the external encoding software. Encoding at high-speed frame-rates can be challenging, since we are also encoding to a PV-file simultaneously. Videos are encoded in a separate thread, without muxing, and will be remuxed after the recording is stopped. For very high frame-rates or resolutions, it may be necessary to limit the duration of videos since all of the images have to be kept in RAM until they have been encoded. RAW images in RAM can take up a lot of space ( $1024 * 1024 * 1000 = 1,048,576,000$  bytes for 1000 images quite low in resolution). If there a recording length is defined prior to starting the program, or a video is converted to PV and streamed to MP4 at the same time (though it is unclear why that would be necessary), TGrabs is able to automatically determine which frame-rate can be maintained reliably and without filling the memory.

## 1462 Appendix 3

### 1463 Connected components algorithm

1464 Pixels are not represented individually in  $\text{TRex}$ . Instead, they are saved as connected hori-  
1465 zontal line segments. For each of these lines, only y- as well as start- and end-position are  
1466 saved ( $y, x_0$  and  $x_1$ ). This representation is especially suited for objects stretching out along  
1467 the x-axis, but of course its worst-case is a straight, vertical line – in which case space re-  
1468 quirements are  $O(2 * N)$  for  $N$  pixels. Especially for big objects, however, only a fraction  
1469 of coordinates has to be kept in memory (with a space requirement of  $O(2 * H)$  instead of  
1470  $O(W * H)$ , with  $W, H$  being width and height of the object).

1471 Extracting these connected horizontal line segments from an image can be parallelized  
1472 easily by cutting the image into full-width pieces and running the following algorithm re-  
1473 peatedly for each row:

- 1474 1. From 0 to  $W$ , iterate all pixels. Always maintain the previous value (binary), as well  
1475 as the current value. We start out with our previous value of  $\bar{p} = 0$  (the border is  
1476 considered not to be an object).
- 1477 2. Now repeat for every pixel  $p_i$  in the current row:
  - 1478 (a) If  $\bar{p}$  is 1 and  $p_i$  is 0, set  $\bar{p} := 0$  and save the position as the end of a line segment  
1479  $x_1 = i - 1$ .
  - 1480 (b) If  $\bar{p}$  is 0 and  $p_i$  is 1, we did not have a previous line segment and a new one starts.  
1481 We save it as our current line segment with  $x_0$  and  $y$  equal to the current row. Set  
1482  $\bar{p} := 1$ .
- 1483 3. After each row, if we have a valid current line, we save it in our array of lines. If  $\bar{p} = 1$   
1484 was set, and the line segment ended at the border  $W$  of the image, we first set its end  
1485 position to  $x_1 := W - 1$ .

1486 We keep the array of extracted lines sorted by their y-coordinate, as well as their x-  
1487 coordinates in the order we encountered them. To extract connected components, we now  
1488 just need to walk through all extracted rows and detect changes in the y-coordinate. The  
1489 only information needed are the current row and the previous row, as well as a list of active  
1490 preliminary "blobs" (or connected components). A blob is simply a collection of ordered  
1491 horizontal line segments belonging to a single connected component. These blobs are pre-  
1492 liminary until the whole image has been processed, since they might be merged into a single  
1493 blob further down despite currently being separate (see Figure A1).

1494 "Rows" are an array of horizontal lines with the same y-coordinate, ordered by their x-  
1495 coordinates (increasing). The following algorithm only considers pairs of previous row  $R_{i-1}$   
1496 and current row  $R_i$ . We start by inserting all separate horizontal line segments of the very  
1497 first row into the pool of active blobs, each assigned their own blob. Lines within row  $R_i$   
1498 are  $L_{i,j}$ . Coordinates of  $L_{i,j}$  will be denoted as  $x_0(i, j)$ ,  $x_1(i, j)$  and  $y(i, j)$ . Our current index  
1499 in row  $R_{i-1}$  is  $j$  and our index in row  $R_i$  is  $k$ . We initialize  $j := 0, k := 1$ . Now for each pair  
1500 of rows, three different actions may be required depending on the case at hand. All three  
1501 actions are hierarchically ordered and mutually exclusive (like a typical `if/else` structure  
1502 would be), meaning that case 0-2 can be true at the same time while no other combination  
1503 can be simultaneously true:

- 1504 1. **Case 0,1 and 2: We have to create a new blob.** This is the case if (0) the line in  $R_i$   
ends before the line in  $R_{i-1}$  starts ( $x_1(i, k) + 1 < x_0(i, j)$ ), or (1) y-coordinates of  $R_i$  and

1504

1505

1506

1507

1508

1509

1510

1511

1512

1513

1514

1515

1516

$R_{i-1}$  are farther apart than 1 ( $y(i-1, j) > y(i, k) + 1$ ), or (2) there are no lines left in  $R_{i-1}$  to match the current line in  $R_i$  to ( $j \geq |R_{i-1}|$ ).  $L_{i,k}$  is assigned with a new blob.

2. **Case 3: Segment in the previous row ends before the segment in the current row starts.** If  $x_0(i, k) > x_1(i-1, j) + 1$ , then we just have to  $j := j + 1$ .

3. **Case 4: Segment in the previous row and segment in the current row intersect in x-coordinates.** If  $L_{i,k}$  is no yet assigned with a blob, assign it with the one from  $L_{i-1,j}$ . Otherwise, both blobs have to be merged. This is done in a sub-routine, which guarantees that lines within blobs stay properly sorted during merging. This means that (i) y-coordinates increase or stay the same and (ii) x-coordinates increase monotonically. Afterwards, we increase either  $k$  or  $j$  based on which one associated line ends earlier: If  $x_1(i, k) \leq x_1(i-1, j)$ , then we increase  $k := k + 1$ ; otherwise  $j := j + 1$ .

1517

1518

1519

After the previous algorithm has been executed on a pair of  $R_{i-1}$  and  $R_i$ , we increase  $i$  by one  $i := i + 1$ . This process is continued until  $i = H$ , at which point all connected components are contained within the active blob array.

1520

1521

1522

1523

1524

1525

1526

1527

Retaining information about pixel values adds slightly more complexity to the algorithm, but is straight-forward to implement. In `TRex`, horizontal line segments comprise  $y$ ,  $x_0$  and  $x_1$  values plus an additional pointer. It points to the start of a line within array of all pixels (or an image matrix), adding only little computational complexity overall.

Based on the horizontal line segments and their order, posture analysis can be sped up when properly integrated. Another advantage is that detection of connected components within arrays of horizontal line segments is supported due to the way the algorithm functions – we can just get rid of the extraction phase.

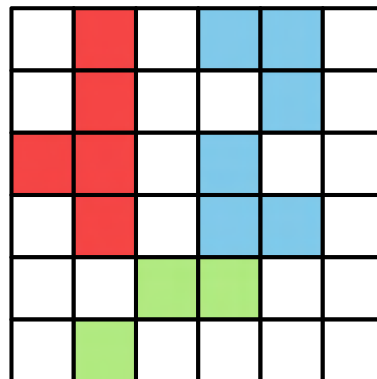

**Appendix 3 Figure A1.** An example array of pixels, or image, to be processed by the connected components algorithm. This figure should be read from top to bottom, just as the connected components algorithm would do. When this image is analysed, the red and blue objects will temporarily stay separate within different "blobs". When the green pixels are reached, both objects are combined into one identity.



## 1528 Appendix 4

### 1529 Matching an object to an object in the next frame

#### 1530 Terminology

1531 A graph is a mathematical structure commonly used in many fields of research, such as  
1532 computer science, biology and linguistics. Graphs are made up of vertices, which in turn  
1533 are connected by edges. Below we define relevant terms that we are going to use in the  
1534 following section:

- 1535 • Directed graph: Edges have a direction assigned to them
- 1536 • Weighted edges: Edges have a weight (or cost) assigned to them
- 1537 • Adjacent nodes: Nodes which are connected immediately by an edge
- 1538 • Path: A path is a sequence of edges, where each edges starting vertex is the end vertex  
1539 of the previous edge
- 1540 • Acyclic graph: The graph contains no path in which the same vertex appears more  
1541 than once
- 1542 • Connected graph: There are no vertices without edges, there is a path from any vertex  
1543 to any other vertex in the graph
- 1544 • Bipartite graph: Vertices can be sorted into two distinct groups, without an edge from  
1545 any vertex to elements of its own group – only to the other group
- 1546 • Tree: A tree is a connected, undirected, acyclic graph, in which any two vertices are  
1547 only connected by exactly one path
- 1548 • Rooted, directed out-tree: A tree where one vertex has been defined to be the root  
1549 and directed edges, with all edges flowing away from the root
- 1550 • Visited vertex: A vertex that is already part of the current path
- 1551 • Leaf: A vertex which has only one edge arriving, but none going out (in a tree this are  
1552 the bottom-most vertices)
- 1553 • Depth-first/breadth-first and best-first search: Different strategies to pick the next ver-  
1554 tex to explore for a set of paths with traversable edges. Depth-first prefers to first go  
1555 deeper inside a graph/tree, before going on to explore other edges of the same ver-  
1556 tex. Breadth-first is the opposite of depth-search. Best-first search uses strategies to  
1557 explore the most promising path first.

#### 1558 Background

1559 The transportation problem is one of the fundamental problems in computer science. It  
1560 solves the problem of transporting a finite number of *goods* to a finite number of *factories*,  
1561 where each possible transport route is associated with a *cost* (or weight). Every factory has  
1562 a *demand* for goods and every good has a limited *supply*. The sum of this cost has to be  
1563 minimized (or benefits maximized), while remaining within the constraints given by supply  
1564 and demand. In the special case where demand by each factory and supply for each good  
1565 are exactly equal to 1, this problem reduces to the *assignment problem*.

The assignment problem can be further separated into two distinct cases: the *balanced*  
and the *unbalanced* assignment problem. In the balanced case, net-supply and demand are  
the same – meaning that the number of factories matches exactly the number of suppliers.  
While the balanced case can be solved slightly more efficiently, most practical problems are  
usually unbalanced (*Ramshaw and Tarjan (2012a)*). Thankfully, unbalanced assignments  
can be reduced to balanced assignments, for example using graph-duplication methods or  
by adding nodes (*Ramshaw and Tarjan (2012a)*, *Ramshaw and Tarjan (2012b)*). This makes  
the widely used Hungarian method (*Kuhn (1955)*; *Munkres (1957)*) a viable solution to both,

1572

1573

1574

1575

1576

1577

1578

1579

with a computational complexity of  $O(m^3)$ . It can be further improved using Fibonacci heaps (not implemented in `TRex`), resulting in  $O(ms + s^2 \log n)$  time-complexity (**Fredman and Tarjan (1987)**), with  $m$  being the number of possible connections/edges,  $s \leq n$  the number of factories to be supplied and  $n$  the number of factories. Re-balancing, by adding nodes or other structures, also adds computational cost – especially when  $s \ll n$  (**Ramshaw and Tarjan (2012b)**).

1580

#### Adaptation for our matching problem

1581

1582

1583

1584

1585

1586

1587

1588

1589

1590

1591

1592

1593

1594

Assigning individuals to objects in the frame is, in the worst case, exactly that: an unbalanced assignment problem – potentially with  $r \neq s$ . During development, we found that we can achieve better average-complexity by combining an approach commonly used to solve *NP-hard* problems. This is a class problems for which it is (probably) not possible to find a polynomial-time solution. In order to motivate our usage of a less stable algorithm than e.g. the Hungarian method, let us first introduce a more general algorithm, following along with remarks for adapting it to our special case. The next subsection concludes with considerations regarding its complexity in comparison to the more stable Hungarian method.

*Branch & Bound* (or BnB, **Land and Doig (1960)**, formalized in **Little et al. (1963)**) is a very general approach to traversing the large search spaces of *NP-hard* problems, traditionally represented by a tree. Branching and bounding gives optimal solutions by traversing the entire search space if necessary, but stopping along the way to evaluate its options, always trying to choose better branches of the tree to explore next or skip unnecessary ones. BnB always consists of three main ingredients:

1595

1596

1597

1598

1. Branching: The division of our problem into smaller, partial problems
2. Bounding: Estimate the upper/lower limits of the probability/cost gain to be expected by traversing a given edge
3. Selection: Determining the next node to be processed

1599

1600

1601

1602

1603

1604

1605

1606

1607

1608

1609

1610

1611

1612

1613

1614

Finding good strategies is essential and can have a big impact on overall computation time. Strategies can only be worked out with insight into the specific problem, but *bounding* is generally the dominating factor here – in that choosing good selection and branching techniques cannot make up for a bad bounding function (**Clausen (1999)**). A bounding function estimates an upper (or lower) limit for the quality of results that can be achieved within a given sub-problem (current branch of the tree).

The "problem" is the entire assignment problem located at the root node of the tree. The further down we go in the tree, the smaller the partial problems become until we reach a leaf. Any graph can be represented as a tree by duplicating nodes when necessary (**Zhang (1996)**, "Graph vs. tree"). So even if the bipartite assignment graph (an example sketched in Figure A1) is a more "traditional" representation of the assignment problem, we can translate it into a rooted, directed out-tree  $T = (U, V, E, F)$  with weighted edges. Here,  $U$  are individuals and  $V$  are objects in the current frame that are potentially assigned to identities in  $U$ .  $E$  are edges mapping from  $U \rightarrow V$ , while  $F : V \rightarrow U$ . It is quite visible from Figure A1, that the representation as a tree (b) is much more verbose than a bipartite graph (a). However, its structure is very simple:

1615

1616

1617

1618

Looking at the tree in Figure A1 (b), individuals (blue) are found along the y-axis/deeper into the tree while objects in the frame (orange) are listed along on the x-axis. This includes a "null" case per individual, representing the possibility that it is *not* assigned to any object – ensuring that every individual has at least one edge.

Tree is never generated in its entirety (except in extreme cases), but it represents all *possible* combinations of individuals and objects. Overall, the set  $Q$  of every complete and valid path from top to bottom would be exactly the same as the set of every valid permutation

1619

1620

1621

1622

1623

1624

1625

1626

1627

1628

1629

1630

1631

1632

1633

1634

1635

1636

1637

1638

1639

1640

1641

1642

1643

1644

1645

1646

1647

1648

1649

1650

1651

1652

1653

1654

1655

1656

1657

1658

1659

1660

1661

1662

1663

1664

1665

1666

1667

1668

1669

1670

1671

1672

of pairings between objects (plus null) and individuals. Edge weights in  $E$  are equal to the probability  $P_i(t, \tau_i | B_j)$  (see equation 7), abbreviated to  $P_i(B_j)$  here since we are only ever looking at one time-step.  $B_j$  is an object and  $i$  is an individual, so we can rewrite it in the current context as  $P_u(v)$ , with  $u \in U; v \in V$ .

We are maximizing the objective function

$$o(\rho) = \sum_{uv \in \rho} P_u(v),$$

where  $\rho \in Q$  is an element of all valid paths within  $T$ .

The simplest approach would be to traverse every edge in the graph and accumulate a sum of probabilities along each path, guaranteeing to find the optimal solution eventually. Since the number of possible combinations  $|U|^{|E|}$  grows rapidly with the number of edges, this is not realistic – even with few individuals. Thus, at least the *typical* number of visited edges has to be minimized. While we do not know the exact solution to our problem before traversing the graph, we can make very good guesses. For example, we may order nodes in such a way that branching (visiting a node leads to  $> 1$  new edges to be visited) is reduced in most cases. To do that, we first need to calculate the *degree* of each individual. The degree  $C_u$  of individual  $u$ , which is exactly equivalent to the maximum number of edges going out from that individual, we define as

$$C_u \in \mathbb{N} := \sum_{v \in V} \begin{cases} 1 & \text{if } P_u(v) > P_{\min} \\ 0 & \text{otherwise} \end{cases}.$$

The maximally probable edge per individual also has to be computed beforehand, defined as

$$\bar{P}_u = \max_{v \in V} \{P_u(v)\}.$$

Nodes are sorted first by their degree (ascending) and secondly by  $\bar{P}_u$  (descending). We call this ordered set  $S$ . Sorting by degree ensures that the nodes with the fewest outgoing edges are visited *first*, causing severe branching to only happen in the lower regions of the tree. This is preferable, because a new branch in the bottom layer merely results in a few more options. If this happens at the top, the tree is essentially duplicated  $C_u$  times – in one step drastically increasing the overall number of items to be kept in memory. This process is, fittingly, called *node sorting* (Zhang (1996)). Sorting by  $\bar{P}_u$  is only applied whenever nodes of the same degree have to be considered.

We always follow the most promising paths first (the one with the highest accumulated probability), which is called "best-first search" (BFS) – our selection strategy for (1.) in 4. BFS is implemented using a queue maintaining the list of all currently expanded nodes.

Regarding (2.) in 4, we utilize  $\bar{P}_u$  as an approximation for the upper bound to the achievable probability in each vertex. For each layer with vertices of  $U$ , we calculate an accumulative sum  $\text{upper\_limit}(i) = \sum_{j > i \in U} \bar{P}_j$ , with  $j, i$  being indices into our ordered set  $S$  of individuals and  $i$  being the current depth in the graph (only counting vertices of  $U$ ). This hierarchical upper limit for the expected value does not consider whether the respective edges are still *viable*, so they could have been eliminated already by assigning the object of  $V$  to another vertex of  $U$  above the current one. Any edge with  $P_{\text{current}} + \text{upper\_limit}(i) < P_{\text{best}}$  is skipped since it can not improve upon our previous best value  $P_{\text{best}}$ . If we do find an edge with a better value, we replace  $P_{\text{best}}$  with the new value and continue.

As an example, let us traverse the tree in Figure A1b:

- 1673 • We first calculate  $\bar{P}_u$  for every  $u \in U$  ( $\bar{P}_0 = 0.85$ ;  $\bar{P}_2 = 0.9$ ;  $\bar{P}_1 = 0.75$ ), as well as the  
1674 hierarchical probability table  $\text{upper\_limit}(i)$  for each index  $0 \leq i < N$  ( $0.9 + 0.75$ ;  $0.75$ ;  $0$ ).  
1675  $P_{\text{best}} := 0$ .  
1676 • Individual 0 (the root) is expanded, which has one edge with probability  $0.85 + \text{upper\_limit}(0) \geq$   
1677  $P_{\text{best}}$  to object 3 (plus the `NULL` case) and is the only node with a degree of 1. We know  
1678 that our now expanded node is the best, since it has the largest probability due to  
1679 sorting, plus also is the deepest. In fact, this is true for all expanded nodes exactly in  
1680 the order they are expanded (depth-first search == best-first search for our case). We  
1681 set  $P_{\text{best}} := 0.85$ . The edge to `NIL` is added to our queue.  
1682 • Objects in  $V$  are only virtual and always have zero-probability connections to the next  
1683 individual in an ordered set ( $f \in F$ ), so they do not add to the overall probability sum.  
1684 We skip to the next node.  
1685 • Individual 2 branches off into one or two different edges, depending on which edges  
1686 have been chosen previously.  
1687 • We first explore the edge towards object 4 with a probability of  $0.9 + \text{upper\_limit}(1) =$   
1688  $1.65 \geq P_{\text{best}}$  and add it to  $P_{\text{best}}$ .  
1689 • Only one possibility is left and we arrive at a leaf with an accumulated probability of  
1690  $0.85 + 0.9 + 0 = 1.75$ .  
1691 • We now perform backtracking, meaning we look at every expanded node in our queue,  
1692 each time observing  $\bar{P}_u + \text{upper\_limit}(i)$ .  
1693 - `NIL` (from node 2) would be added to the front of our queue, however its proba-  
1694 bility  $0.85 + 0 + \text{upper\_limit}(1) = 1.6 < 1.75 = P_{\text{best}}$ , so it is discarded.  
1695 - `NIL` (from node 0) would be added now, but its probability of  $0 + \text{upper\_limit}(0) =$   
1696  $1.65 < P_{\text{best}}$ , so it is also discarded.

1697 We can see that with increased depth, we have to keep track of more and more possi-  
1698 bilities. Since our nodes and edges are pre-sorted, our path through the tree is optimal  
1699 after exactly  $N = |U|$  node expansions (not counting  $v \in V$  expansions since they are only  
1700 "virtual").

## 1701 Complexity

1702 Utilizing these techniques, we can achieve very good average-case complexity. Of course  
1703 having a good worst-case complexity is important (such as the Hungarian method), but the  
1704 impact of a good average-case complexity can be significant as well. This is illustrated nicely  
1705 by the timings measured in Table A3, where our method consistently surpasses the Hunga-  
1706 rian method in terms of performance – especially for very large groups of animals – despite  
1707 having worse worst-case complexity. Usually, even in situations with over 1000 individuals  
1708 present, the average number of leaves visited was approximately 1.112 (see Table A5) and  
1709 each visit was a global improvement (not shown). The number of nodes visited per frame  
1710 were around 2844 to 19,804,880 in the same video, which, given the maximal number of possi-  
1711 ble combinations  $N^M$  for  $M$  edges and  $N$  individuals (**Thomas (2015)**), is quite moderate.  
1712 Especially considering the number of calculations that the Hungarian method has to per-  
1713 form in every step, which, according to its complexity, will be in the range of  $N^3 \approx 1e9$  for  
1714  $N = 1024$  individuals.

1715 The average complexity of a solution using best-first-search BnB is given by **Zhang (1996)**.  
1716 It depends on the probability of encountering a "zero-cost edge"  $p_0$ , as well as the mean  
1717 branching factor  $b$  of the tree:

- 1718 1.  $\Theta(\beta^N)$  when  $bp_0 < 1$ , with  $\beta \leq b$  and  $N$  is the depth of the tree
- 1719 2.  $\Theta(N^2)$  when  $bp_0 = 1$

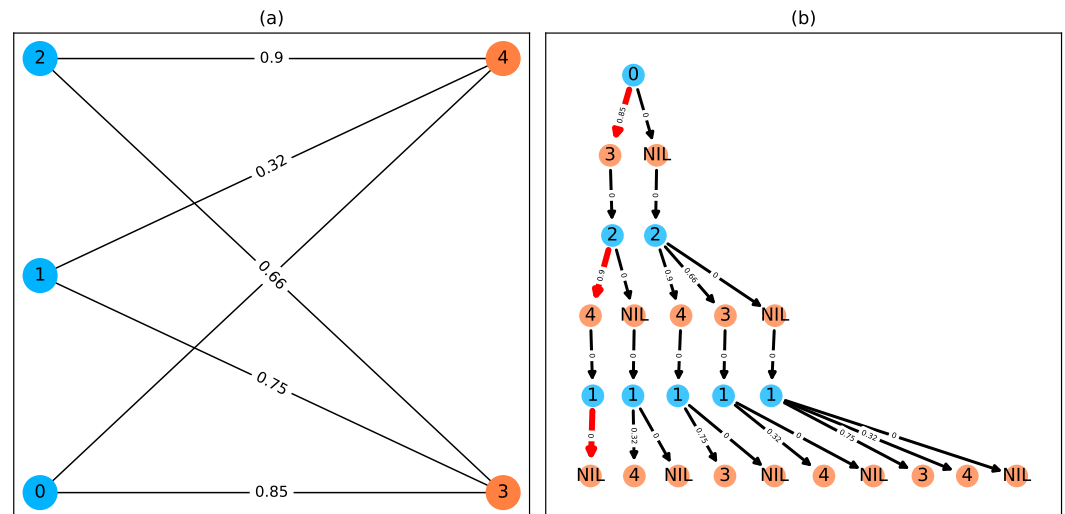

**Appendix 4 Figure A1.** A bipartite graph (a) and its equivalent tree-representation (b). It is *bipartite* since nodes can be sorted into two disjoint and independent sets ( $\{0, 1, 2\}$  and  $\{3, 4\}$ ), where no nodes have edges to other nodes within the same set. (a) is a straight-forward way of depicting an assignment problem, with the identities on the left side and objects being assigned to the identities on the right side. Edge weights are, in  $\text{TRex}$  and this example, probabilities for a given identity to be the object in question. This graph is also an example for an unbalanced assignment problem, since there are fewer objects (orange) available than individuals (blue). The optimal solution in this case, using weight-maximization, is to assign  $0 \rightarrow 3$ ;  $2 \rightarrow 4$  and leave 1 unassigned. Invalid edges have been pruned from the tree in (b), enforcing the rule that objects can only appear once in each path. The optimal assignments have been highlighted in red.

1720  
1721  
1722  
1723  
1724  
1725  
1726  
1727  
1728  
1729  
1730  
1731  
1732  
1733  
1734  
1735  
1736  
1737  
1738  
1739  
1740  
1741  
1742  
1743

3.  $\Theta(N)$  when  $bp_0 > 1 \Leftrightarrow b > 1/p_0$

as  $N \rightarrow \infty$ .

In our case the depth of the tree is exactly the number of individuals  $N$ , which we have already substituted here. This is the number of nodes that have to be visited in the best case. A "zero-cost edge" is an edge that does not add any cost to the current path. We are maximizing (not minimizing) so in our case this would be "an edge with a probability of 1". While reaching exactly 1 is improbable, it is (in our case) equivalent to "having only one viable edge arriving at an object".  $p_0$  depends very much on the settings, specifically the maximum movement speed allowed, and behavior of individuals, which is why in scenarios with  $> 100$  individuals the maximum speed should always be adjusted first. To put it another way: If there are only few branching options available for the algorithm to explore per individual, which seems to be the case even in large groups, we can assume our graph to have a probability  $p_0$  within  $0 \ll p_0 \leq 1$ . The mean branching factor  $b$  is given by the mean number of edges arriving at an object (not an individual). Averaging at around  $b \approx k + 1$ , with  $k \geq 1$  being the average number of assignable blobs per individual (roughly 1.005 in Video 0) and 1 the null-case, we can assume  $bp_0$  to be  $> 1$  on average. An average complexity of  $O(N^2)$ , as long as  $b > 1/p_0$ , is even better than the complexity of the Hungarian method (which is also  $O(N^3)$  in the average-case, *Bertsekas (1981)*), giving a possible explanation for the good results achieved using tree-based matching in  $\text{TRex}$  on average (Table A3).

Further optimizations could be implemented, e.g. using impact-based heuristics (as an example of dynamic variable ordering) instead of the static and coarse maximum probability estimate used here. Such heuristics first choose the vertex "triggering the largest search space reduction" (*Pesant et al. (2012)*). In our case, assigning an individual first if, for example, it has edges to many objects that each only one other individual is connected to.



**Appendix 4 Table A1.** Showing quantiles for frame timings for videos of the *speed* dataset (without posture enabled). Videos 15, 16 and 14 each contain a short sequence of taking out the fish, causing a lot of big objects and noise in the frame. This leads to relatively high spikes in these segments of the video, resulting in high peak processing timings here. Generally, processing time is influenced by a lot of factors involving not only TRex, but also the operating system as well as other programs. While we did try to control for these, there is no way to make sure. However, having sporadic spikes in the timings per frame does not significantly influence overall processing time, since it can be compensated for by later frames. We can see that videos of all quantities  $\leq 256$  individuals can be processed faster than they could be recorded. Videos that can not be processed faster than real-time are underlaid in gray.

| video characteristics |        |            | ms / frame (processing) |       |        |         |             | processing time |
|-----------------------|--------|------------|-------------------------|-------|--------|---------|-------------|-----------------|
| video                 | # ind. | ms / frame | 5%                      | mean  | 95%    | max     | > real-time | % video length  |
| 0                     | 1024   | 25.0       | 46.93                   | 62.96 | 119.54 | 849.16  | 100.0%      | 358.12          |
| 1                     | 512    | 20.0       | 19.09                   | 29.26 | 88.57  | 913.52  | 92.11%      | 259.92          |
| 2                     | 512    | 16.67      | 17.51                   | 26.53 | 36.72  | 442.12  | 97.26%      | 235.39          |
| 3                     | 256    | 20.0       | 8.35                    | 11.28 | 13.25  | 402.54  | 1.03%       | 77.18           |
| 4                     | 256    | 16.67      | 8.04                    | 11.62 | 13.48  | 394.75  | 1.13%       | 94.77           |
| 5                     | 128    | 16.67      | 3.54                    | 5.14  | 5.97   | 367.92  | 0.41%       | 40.1            |
| 6                     | 128    | 16.67      | 3.91                    | 5.64  | 6.89   | 381.51  | 0.51%       | 44.38           |
| 7                     | 100    | 31.25      | 2.5                     | 3.57  | 5.19   | 316.75  | 0.1%        | 28.35           |
| 8                     | 59     | 19.61      | 1.43                    | 2.29  | 3.93   | 2108.77 | 0.19%       | 16.33           |
| 9                     | 15     | 40.0       | 0.4                     | 0.52  | 1.67   | 4688.5  | 0.01%       | 2.96            |
| 10                    | 10     | 10.0       | 0.28                    | 0.33  | 0.57   | 283.7   | 0.07%       | 8.08            |
| 11                    | 10     | 31.25      | 0.21                    | 0.25  | 0.65   | 233.7   | 0.01%       | 3.48            |
| 12                    | 10     | 31.25      | 0.23                    | 0.27  | 0.75   | 225.63  | 0.02%       | 2.82            |
| 13                    | 10     | 31.25      | 0.22                    | 0.25  | 0.54   | 237.32  | 0.02%       | 2.64            |
| 14                    | 8      | 33.33      | 0.24                    | 0.29  | 0.66   | 172.8   | 0.02%       | 1.8             |
| 15                    | 8      | 40.0       | 0.22                    | 0.26  | 0.88   | 244.88  | 0.01%       | 1.5             |
| 16                    | 8      | 28.57      | 0.18                    | 0.21  | 0.51   | 1667.14 | 0.02%       | 1.38            |
| 17                    | 1      | 7.14       | 0.03                    | 0.04  | 0.06   | 220.81  | 0.01%       | 1.56            |

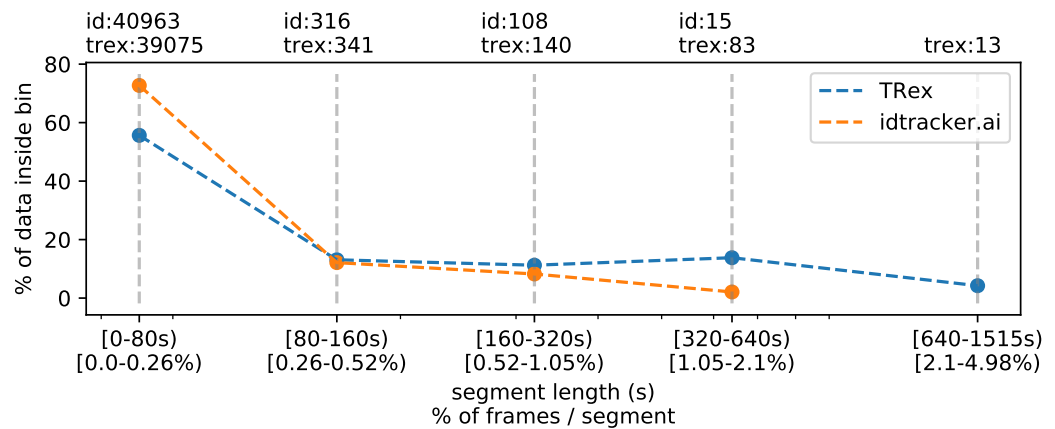

**Appendix 4 Figure A2.** The same set of videos as in [Table 5](#) pooled together, we evaluate the efficiency of our crossings solver. *Consecutive frame segments* are sequences of frames without gaps, for example due to crossings or visibility issues. We find these *consecutive frame segments* in data exported by TRex, and compare the distribution of segment-lengths to idtracker.ai's results (as a reference for an algorithm without a way to resolve crossings). In idtracker.ai's case, we segmented the non-interpolated tracks by missing frames, assuming tracks to be correct in between. The Y-axis shows the percentage of  $\sum_{k \in [1, V]} \text{video\_length}_k * \#\text{individuals}_k$  in  $V$  videos that one column makes up for – the overall coverage for TRex was 98%, while idtracker.ai was slightly worse with 95.17%. Overall, the data distribution suggests that, probably due to it attempting to resolve crossings, TRex seems to produce longer consecutive segments.

**Appendix 4 Table A2.** A quality assessment of assignment decisions made by the general purpose tracking system without the aid of visual recognition – comparing results of two accurate tracking algorithms with the assignments made by an approximate method. Here, *decisions* are reassignments of an individual after it has been lost, or the tracker was too "unsure" about an assignment. Decisions can be either correct or wrong, which is determined by comparing to reference data generated using automatic visual recognition: Every segment of frames between decisions is associated with a corresponding "baseline-truth" identity from the reference data. If this association changes after a decision, then that decision is counted as wrong. Analysing a decision may fail if no good match can be found in the reference data (which is not interpolated). Failed decisions are ignored. Comparative values for the Hungarian algorithm ([Kuhn \(1955\)](#)) are always exactly the same as for our tree-based algorithm, and are therefore not listed separately. Left-aligned *total*, *excluded* and *wrong* counts in each column are results achieved by an accurate algorithm, numbers to their right are the corresponding results using an approximate method.

| video | # ind. | length     | total |       | excluded |       | wrong         |               |
|-------|--------|------------|-------|-------|----------|-------|---------------|---------------|
| 7     | 100    | 1min       | 717   | 755   | 22       | 22    | 45 (6.47%)    | 65 (8.87%)    |
| 8     | 59     | 10min      | 279   | 312   | 146      | 100   | 55 (41.35%)   | 32 (15.09%)   |
| 9     | 15     | 1h0min     | 838   | 972   | 70       | 111   | 100 (13.02%)  | 240 (27.87%)  |
| 13    | 10     | 10min3s    | 331   | 337   | 22       | 22    | 36 (11.65%)   | 54 (17.14%)   |
| 12    | 10     | 10min3s    | 382   | 404   | 42       | 43    | 83 (24.41%)   | 130 (36.01%)  |
| 11    | 10     | 10min10s   | 1067  | 1085  | 50       | 52    | 73 (7.18%)    | 92 (8.91%)    |
| 14    | 8      | 3h15min22s | 7424  | 7644  | 1428     | 1481  | 1174 (19.58%) | 1481 (24.03%) |
| 15    | 8      | 1h12min    | 3538  | 3714  | 427      | 517   | 651 (20.93%)  | 962 (30.09%)  |
| 16    | 8      | 3h18min13s | 2376  | 3305  | 136      | 206   | 594 (26.52%)  | 1318 (42.53%) |
| sum   |        |            | 16952 | 16754 | -2343    | -2554 | 2811 (19.24%) | 4374 (27.38%) |

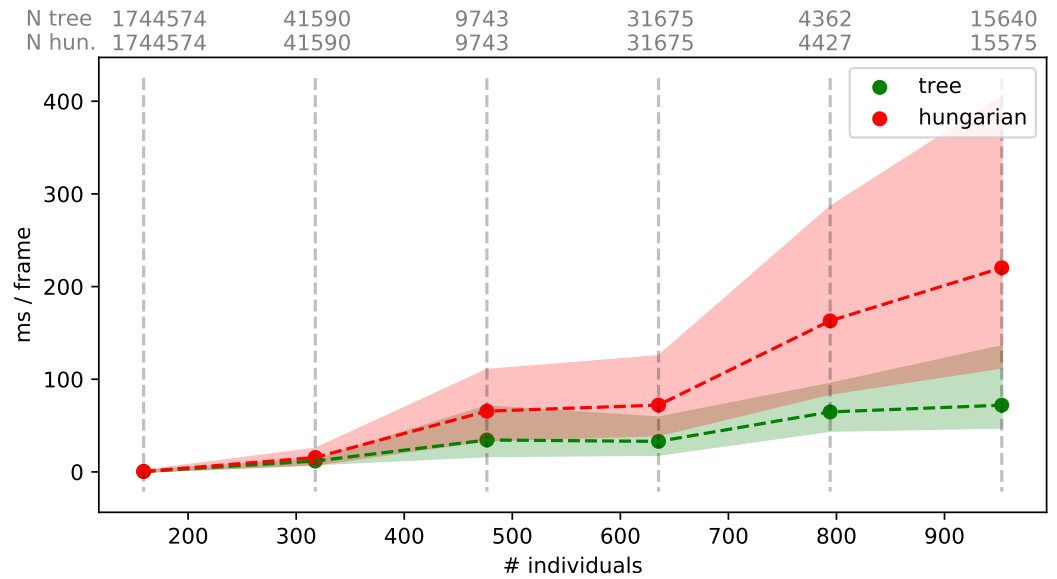

**Appendix 4 Figure A3.** Mean values of processing-times and 5%/95% percentiles for video frames of all videos in the *speed dataset* (Table 1), comparing two different matching algorithms. Parameters were kept identical, except for the matching mode, and posture was turned off to eliminate its effects on performance. Our tree-based algorithm is shown in green and the Hungarian method in red. Grey numbers above the graphs show the number of samples within each bin, per method. Differences between the algorithms increase very quickly, proportional to the number of individuals. Especially the Hungarian method quickly becomes very computationally intensive, while our tree-based algorithm shows a much shallower curve. Some frames could not be solved in reasonable time by the tree-based algorithm alone, at which point it falls back to the Hungarian algorithm. Data-points belonging to these frames ( $N = 79$ ) have been excluded from the results for both algorithms. One main advantage of the Hungarian method is that, with its bounded worst-case complexity (see Matching an object to an object in the next frame), no such combinatorical explosions can happen. However, even given this advantage the Hungarian method still leads to significantly lower processing speed overall (see also appendix Table A3).

**Appendix 4 Table A3.** Comparing computation speeds of the tree-based tracking algorithm with the widely established Hungarian algorithm *Kuhn (1955)*, as well as an approximate version optimized for large quantities of individuals. Posture estimation has been disabled, focusing purely on the assignment problem in our timing measurements. The tree-based algorithm is programmed to fall back on the Hungarian method whenever the current problem "explodes" computationally – these frames were excluded. Listed are relevant video metrics on the left and mean computation speeds on the right side for three different algorithms: (1) The tree-based and (2) the approximate algorithm presented in this paper, and (3) the Hungarian algorithm. Speeds listed here are percentages of real-time (the videos' fps), demonstrating usability in closed-loop applications and overall performance. Results show that increasing the number of individuals both increases the time-cost, as well as producing much larger relative standard deviation values. (1) is almost always fast than (3), while becoming slower than (2) with increasing individual numbers. In our implementation, all algorithms produce faster than real-time speeds with 256 or fewer individuals (see also appendix Table A1), with (1) and (2) even getting close for 512 individuals.

| video | video metrics |          |                         | % real-time       |                   |                   |
|-------|---------------|----------|-------------------------|-------------------|-------------------|-------------------|
|       | # ind.        | fps (Hz) | size (px <sup>2</sup> ) | tree              | approximate       | hungarian         |
| 0     | 1024          | 40       | 3866 × 4048             | 35.49 ± 65.94     | 38.69 ± 65.39     | 12.05 ± 18.72     |
| 1     | 512           | 50       | 3866 × 4140             | 51.18 ± 180.08    | 75.02 ± 193.0     | 28.92 ± 29.12     |
| 2     | 512           | 60       | 3866 × 4048             | 59.66 ± 121.4     | 65.58 ± 175.51    | 23.18 ± 26.83     |
| 3     | 256           | 50       | 3866 × 4140             | 174.02 ± 793.12   | 190.62 ± 743.54   | 127.86 ± 9841.21  |
| 4     | 256           | 60       | 3866 × 4048             | 140.73 ± 988.15   | 155.9 ± 760.05    | 108.48 ± 2501.06  |
| 5     | 128           | 60       | 3866 × 4048             | 318.6 ± 347.8     | 353.58 ± 291.63   | 312.05 ± 337.71   |
| 6     | 128           | 60       | 3866 × 4048             | 286.13 ± 330.08   | 314.91 ± 303.53   | 232.33 ± 395.21   |
| 7     | 100           | 32       | 3584 × 3500             | 572.46 ± 98.21    | 611.5 ± 96.46     | 637.87 ± 97.03    |
| 8     | 59            | 51       | 2306 × 2306             | 744.98 ± 264.43   | 839.45 ± 257.56   | 864.01 ± 223.47   |
| 9     | 15            | 25       | 1880 × 1881             | 4626.84 ± 424.8   | 4585.08 ± 378.64  | 4508.08 ± 404.56  |
| 10    | 10            | 100      | 1920 × 1080             | 2370.35 ± 303.94  | 2408.27 ± 297.83  | 2362.42 ± 296.99  |
| 11    | 10            | 32       | 3712 × 3712             | 6489.12 ± 322.59  | 6571.28 ± 306.34  | 6472.0 ± 322.03   |
| 12    | 10            | 32       | 3712 × 3712             | 6011.59 ± 318.12  | 6106.12 ± 305.96  | 5549.25 ± 318.21  |
| 13    | 10            | 32       | 3712 × 3712             | 6717.12 ± 325.37  | 6980.12 ± 316.59  | 6726.46 ± 316.87  |
| 14    | 8             | 30       | 3008 × 3008             | 8752.2 ± 2141.03  | 8814.63 ± 2101.4  | 8630.73 ± 2177.16 |
| 15    | 8             | 25       | 3008 × 3008             | 9786.68 ± 1438.08 | 10118.04 ± 1380.2 | 9593.44 ± 1439.28 |
| 16    | 8             | 35       | 3008 × 3008             | 9861.42 ± 1424.91 | 10268.82 ± 1339.8 | 9680.68 ± 1387.14 |
| 17    | 1             | 140      | 1312 × 1312             | 15323.05 ± 637.17 | 15250.39 ± 639.2  | 15680.93 ± 640.99 |

**Appendix 4 Table A4.** Comparing the time-cost for tracking and converting videos in two steps with doing both of those tasks at the same time. The columns *prepare* and *tracking* show timings for the tasks when executed separately, while *live* shows the time when both of them are performed at the same time using the live-tracking feature of TGrabs. The column *win* shows the time "won" by combining tracking and preprocessing as the percentage  $(\text{prepare} + \text{tracking} - \text{live}) / (\text{prepare} + \text{tracking})$ . The process is more complicated than simply adding up timings of the tasks. Memory and the interplay of work-loads have a huge effect here. Posture is enabled in all variants.

| video metrics |        |           |          | minutes       |              |               |         |
|---------------|--------|-----------|----------|---------------|--------------|---------------|---------|
| video         | # ind. | length    | fps (Hz) | prepare       | tracking     | live          | win (%) |
| 0             | 1024   | 8.33min   | 40       | 10.96 ± 0.3   | 41.11 ± 0.34 | 65.72 ± 1.35  | -26.23  |
| 1             | 512    | 6.67min   | 50       | 11.09 ± 0.24  | 24.43 ± 0.2  | 33.67 ± 0.58  | 5.24    |
| 2             | 512    | 5.98min   | 60       | 11.72 ± 0.2   | 20.86 ± 0.47 | 31.1 ± 0.62   | 4.55    |
| 3             | 256    | 6.67min   | 50       | 11.09 ± 0.21  | 7.99 ± 0.17  | 12.35 ± 0.17  | 35.26   |
| 4             | 256    | 5.98min   | 60       | 11.76 ± 0.26  | 9.04 ± 0.26  | 15.08 ± 0.13  | 27.46   |
| 6             | 128    | 5.98min   | 60       | 11.77 ± 0.29  | 4.74 ± 0.13  | 12.13 ± 0.32  | 26.49   |
| 5             | 128    | 6.0min    | 60       | 11.74 ± 0.26  | 4.54 ± 0.1   | 12.08 ± 0.25  | 25.79   |
| 7             | 100    | 1.0min    | 32       | 1.92 ± 0.02   | 0.47 ± 0.01  | 2.03 ± 0.02   | 14.88   |
| 8             | 59     | 10.0min   | 51       | 6.11 ± 0.07   | 7.68 ± 0.12  | 9.28 ± 0.08   | 32.7    |
| 9             | 15     | 60.0min   | 25       | 12.59 ± 0.18  | 5.32 ± 0.07  | 13.17 ± 0.12  | 26.47   |
| 11            | 10     | 10.17min  | 32       | 8.58 ± 0.04   | 0.74 ± 0.01  | 8.8 ± 0.12    | 5.66    |
| 12            | 10     | 10.05min  | 32       | 8.68 ± 0.04   | 0.75 ± 0.01  | 8.65 ± 0.07   | 8.3     |
| 13            | 10     | 10.05min  | 32       | 8.67 ± 0.03   | 0.71 ± 0.01  | 8.65 ± 0.07   | 7.76    |
| 10            | 10     | 10.08min  | 100      | 4.17 ± 0.06   | 2.02 ± 0.02  | 4.43 ± 0.05   | 28.3    |
| 14            | 8      | 195.37min | 30       | 110.51 ± 2.32 | 8.99 ± 0.22  | 109.97 ± 2.05 | 7.98    |
| 15            | 8      | 72.0min   | 25       | 31.84 ± 0.53  | 3.26 ± 0.07  | 32.1 ± 0.42   | 8.55    |
| 16            | 8      | 198.22min | 35       | 133.45 ± 2.22 | 11.38 ± 0.28 | 133.1 ± 2.28  | 8.1     |
|               |        |           |          |               |              | mean          | 14.55 % |



**Appendix 4 Table A5.** Statistics for running the tree-based matching algorithm with the videos of the speed dataset. We achieve really low leaf and node visits across the board – this is especially interesting in the high-density cases. High values for # nodes visited can be disregarded in practice, as long as they do not make up a large part of the cases. If such high numbers are reached, TRex automatically switches to a more bounded algorithm like the Hungarian method.

| video characteristics |        | matching stats                 |              |        |           |           |
|-----------------------|--------|--------------------------------|--------------|--------|-----------|-----------|
| video                 | # ind. | # nodes visited (5,50,95,100%) | # leaves     | # imp. | obj.edges | ind.edges |
| 0                     | 1024   | [1536; 2844; 77364; 19804880]  | 1.112 ± 0.36 | 1.112  | 1.001     | 1.005     |
| 1                     | 512    | [1063; 7390; 793195; 19889494] | 1.243 ± 0.62 | 1.243  | 1.005     | 1.037     |
| 2                     | 512    | [990; 2214; 54969; 7382470]    | 1.159 ± 0.47 | 1.159  | 1.002     | 1.01      |
| 3                     | 256    | [452; 479; 962; 272765]        | 1.064 ± 0.29 | 1.064  | 1.004     | 1.015     |
| 4                     | 256    | [475; 496; 584; 610468]        | 1.029 ± 0.18 | 1.029  | 1.0       | 1.006     |
| 6                     | 128    | [237; 259; 506; 881084]        | 1.046 ± 0.25 | 1.046  | 1.002     | 1.01      |
| 5                     | 128    | [233; 245; 258; 5258]          | 1.012 ± 0.12 | 1.012  | 1.001     | 1.006     |
| 7                     | 100    | [195; 199; 199; 13585]         | 1.014 ± 0.14 | 1.014  | 1.051     | 1.326     |
| 8                     | 59     | [117; 117; 117; 16430]         | 1.014 ± 0.2  | 1.014  | 1.129     | 1.463     |
| 9                     | 15     | [24; 29; 29; 635]              | 1.027 ± 0.22 | 1.027  | 1.169     | 1.789     |
| 10                    | 10     | [17; 19; 19; 56]               | 1.001 ± 0.02 | 1.001  | 1.001     | 1.003     |
| 11                    | 10     | [19; 19; 19; 129]              | 1.006 ± 0.1  | 1.006  | 1.085     | 1.446     |
| 12                    | 10     | [19; 19; 19; 1060]             | 1.023 ± 0.23 | 1.023  | 1.264     | 2.433     |
| 13                    | 10     | [19; 19; 19; 106]              | 1.001 ± 0.04 | 1.001  | 1.07      | 1.344     |
| 15                    | 8      | [13; 15; 15; 598]              | 1.024 ± 0.23 | 1.024  | 1.131     | 1.674     |
| 16                    | 8      | [15; 15; 15; 2151]             | 1.009 ± 0.17 | 1.009  | 1.144     | 1.756     |
| 14                    | 8      | [11; 15; 15; 904]              | 1.003 ± 0.08 | 1.003  | 1.022     | 1.138     |

## 1744 Appendix 5

### 1745 Posture

1746 Estimating an animals orientation and body pose in space is a diverse topic, where angle  
1747 and pose can mean many different things. We are not estimating the individual positions  
1748 of many legs and antennae in TRex, we simply want to know where the front- and the back-  
1749 end of the animal are. Ultimately, the goal here is to be able to align animals using an  
1750 arbitrary axis with their head extending in one direction and their tail roughly in the opposite  
1751 direction. In order to achieve this, we are required to follow a series of steps to acquire all  
1752 the necessary information:

- 1753 1. Locate objects in the image
- 1754 2. Detect the edge of objects
- 1755 3. Find an ordered set of points (the outline), which in sequence approximate the outer  
1756 edge of an object in the scene. This is done for each object (as well as for holes).
- 1757 4. Calculate a center-line based on local curvature of the outline.
- 1758 5. Calculate head and tail positions.

1759 The first point is a given at this point (see Connected components algorithm). We can  
1760 utilize the format in which connected components are computed in TRex (an ordered array  
1761 of horizontal line segments), which reduces redundancy by avoiding to look at every individ-  
1762 ual pixel. These line segments also contain information about edges since every start and  
1763 end has to be an edge-pixel, too.

1764 Even though we already have a list of edge-pixels, retrieving an *ordered* set of points is  
1765 crucial and requires much more effort. Without information about a pixels connectivity, we  
1766 can not differentiate between inner and outer shapes (holes vs. outlines) and we can not  
1767 calculate local curvature.

### 1768 Connecting pixels to form an outline

1769 We implemented an algorithm based on horizontal line segments, which only ever retains  
1770 three consecutive rows of pixels ( $p$  previous,  $c$  current and  $n$  next). These horizontal line  
1771 segments always stem from a "blob" (or connected component). Rows contain (i) their  $y$ -  
1772 value in pixels, (ii)  $x_0, x_1$  values describing the first and last "on"-pixel that has been found  
1773 in it, (iii) a set of detected border pixels (identified by their  $x$ -coordinate). A row is valid,  
1774 whenever the  $y$  coordinate is not  $-1$  – all three rows are initialized to an invalid  $y = -1$ .  $l'$   
1775 is the previous row. Using  $p, corn$  as a function  $c(x)$  returns 1 for on-pixels at that  $x$ -coordinate,  
1776 and 0 for off-pixels.

1777 For each line  $l$  in the sorted list of horizontal line segments, we detect border pixels:

- 1778 1. subtract the blobs position (minimum of all  $l_{x0}$  and  $l_y$ , separately) from  $l$
- 1779 2. **if**  $n_y \neq l_y$ , a row has ended and a new one starts: call finalize  
1780 **else if**  $l_{x0} - l'_{x1} \geq 1 \wedge l_{x0} \geq c_{x0}$ , we either skipped a few pixels in  $n$  or  $l$  starts before  
1781  $c$  even had valid pixels. This means that all pixels  $x$  between  $\max\{l'_{x1} + 1; c_{x0}\} \leq x <$   
1782  $\min\{l_{x0}; c_{x1} + 1\}$  are border pixels in  $c$ .
- 1783 3. **if**  $l_{x1} < c_{x0}$ , or  $c$  is invalid, then line  $l$  ends before the previous row ( $c$ ) even has any  
1784 "on"-pixels. All pixels  $x$  between  $l_{x0} \leq x \leq l_{x1}$  are border pixels in  $n$ .
- 1785 **else**
  - 1786 (a)  $s := l_{x0}$
  - (b) **if**  $s < c_{x0}$ , then lines are overlapping in  $c$  and  $n$  (line  $l$ ). We can fill  $n$  up with border  
while  $x < c_{x0}$  and  $x \leq l_{x1}$ . Set  $s := \min\{c_{x0} - 1; l_{x1}\}$ .

1787

1788

1789

1790

1791

1792

1793

1794

1795

1796

1797

1798

1799

1800

1801

1802

1803

1804

1805

1806

1807

1808

1809

1810

1811

1812

1813

1814

1815

1816

1817

1818

1819

1820

1821

1822

1823

1824

1825

1826

1827

1828

1829

1830

1831

1832

1833

1834

1835

**else if**  $s = 0$  or  $s > 0 \wedge n(s - 1) = 0$ , then  $l$  starts at the image border (which is an automatic border pixel) or there is a gap before  $l$ . Set  $s := s + 1$ .

(c) All pixels at  $x$ -coordinates  $s \leq x \leq l_{x1}$  are border in  $n$ , if they are either (i) beyond  $c$ 's bounds ( $x \geq c_{x1}$ ), or (ii)  $c(x) = 0$ .

4. Set  $n_{x1} := l_{x1}$ .

After iterating through all lines, we need two additional calls to `finalize` to populate the lines currently in  $c$  and  $n$  through.

A graph is updated each time a row is finalized. This graph stores all border "nodes", as well as all a maximum of two edges per node (since this is the maximum number of neighbors for a line vertex). More on that below. The following procedure (`finalize`) prepares a row ( $c$ ) to be integrated into the graph, using two parameters: A triplet of rows ( $p, c, n$ ) and the first line  $l$ , which started the new row to be added.

1. **if**  $n$  is invalid, continue to the next operation.

**else if**  $l_y > n_y + 1$ , then we skipped at least one row between  $n$  and the new row – making all on-pixels in  $n$  border pixels.

**else** we have consecutive rows where  $l_y = n_y + 1$ . All on-pixels  $x$  in  $n$  between  $n_{x0} \leq x \leq l_{x0} - 1$  are border pixels.

2. Now the current row ( $c$ ) is certainly finished, as it will in the following become the previous row ( $p$ ), which is read-only at that point. We can add every border-pixel of  $c$  to our graph (see below).

3. It then discards  $p$  and moves  $c \rightarrow p$  and  $n \rightarrow c$ , as well as reading a new row to assign to  $n$ , setting  $n_{x0} = l_{x0}$ ,  $n_{x1} = l_{x1}$ ,  $n_y = l_y$ .

The graph consists of nodes (border pixels), indexed by their  $x$  and  $y$  coordinates (integers) and containing a list of all on-pixels around them (8-neighbourhood with top-left, top, left, bottom-left, etc.). This information is available when `finalize` is called, since the middle row ( $c$ ) is fully defined at that point (its entire neighbourhood has been cached).

After all rows have been processed, an additional step is needed to connect all nodes and produce a connected, clockwise ordered outline. We already marked all pixels that have at least one border. We can also already mark TOP, RIGHT, BOTTOM and LEFT borders per node if no neighbouring pixel is present in that direction, since these major directions will definitely get a "line" in the end. So all we have left to do now, is check the diagonals. The points that will be returned, are located half-way along the outer edges of pixels. In the end, each pixel can potentially have four border lines (if it is a singular pixel without connections to other pixels, see yellow "hole" in Figure A1b). The half-edge-points for each node are generated as follows:

1. A nodes list of border pixels is a sparse, ordered list of directions (top, top-right, ..., top-left). Each major direction of these (TOP, RIGHT, BOTTOM, LEFT), if present, check the face of their square to the left of them (own direction - 1, or -45°). For example, TOP would check top-left.

2. **if** the checked neighbour is on, we add an edge between our face (e.g. TOP) and its 90° rotated face (e.g. own direction + 2 = RIGHT).

**else** check the face an additional 45° to the left (e.g. LEFT).

(a) **if** it there is an on-pixel attached to this face, add an edge between the two faces (of the focal and its left pixel) in the same direction (e.g. TOP→TOP).

(b) **else** we do not seem to have a neighbour to either side, so this must be a corner pixel. Add an edge from the focal face (e.g. TOP) to the side 90° to the left of itself (e.g. LEFT).

1836 Each time an edge is added, more and more of the half-edges are becoming fully-connected  
1837 (meaning they have two of the allowed two edges). To generate the final result, all we have  
1838 to do is to start somewhere in the graph and walk strictly in clockwise direction. "Walking"  
1839 is done using a queue and edges are followed using depth-first search (see Matching an ob-  
1840 ject to an object in the next frame): Each time a node is visited, all its yet unexplored edges  
1841 are added to the front of the queue (in clockwise order). Already visited edges are marked  
1842 (or pruned) and will not be traversed again – their floating-point positions (somewhere on  
1843 an edge of its parent pixel) are added to an array.

1844 After a path ended, meaning that no more edges can be reached from our current node,  
1845 the collected floating-point positions are pushed to another array and a different, yet unvis-  
1846 ited, starting node is sought. This way, we can accumulate all available outlines in a given  
1847 image one-by-one – including holes.

1848 These outlines will usually be further processed using an Elliptical Fourier Transform  
1849 (or EFT, *Kuhl and Giardina (1982)*), as mentioned in the main-text. Outlines can also be  
1850 smoothed using a weighted average of the  $N$  points around a given point, or resampled to  
1851 either reduce or (virtually) increase resolution.

### 1852 Finding the tail

1853 Given an ordered outline, curvature can be calculated locally (per index  $i$ ):  
1854  
1855

$$1856 C(i) = 4 * \text{triangle\_area}(p_{i-r}, p_i, p_{i+r}) / (\|p_i - p_{i-r}\| * \|p_i - p_{i+r}\| * \|p_{i-r} - p_{i+r}\|)$$

1857 where  $1 \leq r \in \mathbb{N}$  is a parameter, which effectively leads to more smoothing when in-  
1858 creased. Triangle area can be calculated as follows:  
1859  
1860

$$1861 \text{triangle\_area}(\mathbf{a}, \mathbf{b}, \mathbf{c}) = (\mathbf{b}_x - \mathbf{a}_x)(\mathbf{c}_y - \mathbf{a}_y) - (\mathbf{b}_y - \mathbf{a}_y)(\mathbf{c}_x - \mathbf{a}_x).$$

1862 To find the "tail", or the pointy end of the shape, we employ a method closely related to  
1863 scipys find\_peaks function: We find local maxima using discrete curve differentiation and  
1864 then generate a hierarchy of these extrema. The only major difference to normal differen-  
1865 tiation is that we assume periodicity to achieve our results – values wrap around in both  
1866 directions, since we are dealing with an outline here. We then find the peak with the largest  
1867 integral, meaning we detect both very wide and very high peaks (just not very slim ones).  
1868 The center of this peak is the "tail".

1869 To find the head as well, we now have to search for the peak that has the largest (index-  
1870 ) distance to the tail-peak. This is a periodic distance, too, meaning that  $N$  is one of the  
1871 closest neighbours of 0.

1872 The entire outline array is then rotated, so that the head is always the first point in it.  
1873 Both indexes are saved.  
1874  
1875

### 1876 Calculating the center-line

1877 A center-line, for a given outline, can be calculated by starting out at the head and walking  
1878 in both directions from there – always trying to find a pair of points with minimal distance  
1879 to each other on both sides. Two indices are used:  $l, r$  for left and right. We also allow  
1880 some "wiggle-room" for the algorithm to find the best-matching points on each side. This  
1881 is limited by a maximum offset of  $\omega$  points which is set to  $0.025 * N$  by default, where  $N$  is  
1882 the number of points in the outline.  $\mathbf{f}(i)$  gives the point on in outline at position  $i$ .

1883 Starting from  $l := -1, r := 1$  we continue while  $r < l + N$ :

- 1884 1. Find  $m := \operatorname{argmin}_i \{ \|\mathbf{f}(r+i) - \mathbf{f}(l)\| ; \forall i \leq \omega \wedge r+i < N \}$ . If no valid  $m$  can be found, abort.  
1885 Otherwise set  $r := m$ .

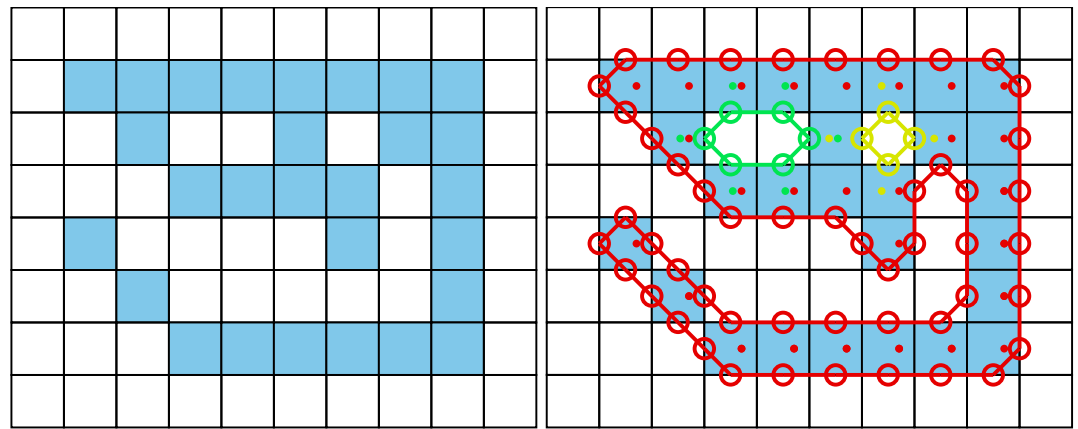

**Appendix 5 Figure A1.** The original image is displayed on the left. Each square represents one pixel. The processed image on the right is overlaid with lines of different colors, each representing one connected component detected by our outline estimation algorithm. Dots in the centers of pixels are per-pixel-identities returned by OpenCVs `findContours` function (for reference) coded in the same colors as ours. Contours calculated by OpenCVs algorithm can not be used to estimate the one-pixel-wide "tail" of the 9-like shape seen here, since it becomes a 1D line without sub-pixel accuracy. Our algorithm also detects diagonal lines of pixels, which would otherwise be an aliased line when scaled up.

- 1886 2. Find  $k := \operatorname{argmin}_i \{ \|\mathbf{f}(l - i + N) - \mathbf{f}(r)\| ; \forall i \leq \omega \wedge l - i \leq -N \}$ . If no valid  $k$  can be found,  
1887 abort. Otherwise set  $l := k$ .  
1888 3. Our segment now consists of points  $\mathbf{f}(m)$  and  $\mathbf{f}(k)$ , with a center vector of  $(\mathbf{f}(k) - \mathbf{f}(m)) * 0.5 + \mathbf{f}(m)$ . Push it to the center-line array. We can also calculate the width of the body  
1889 at that point using  $\|\mathbf{f}(k) - \mathbf{f}(m)\|$ .  
1890 4. Set  $l := l - 1$ .  
1891 5. Set  $r := r + 1$ .  
1892

1893 Head and tail positions can be switched now, e.g. for animals where the wider part is the  
1894 head. We may also want to start at the slimmest peak first, which ever that is, since there  
1895 we have not as much space for floating-point errors regarding where *exactly* the peak was.  
1896 These options depend on the specific settings used in each video.

1897 The angle of the center-line is calculated using `atan2` for a vector between the first point  
1898 and one point at an offset from it. The specific offset is determined by a `midline stiffness`  
1899 parameter, which offers some additional stability – despite e.g. potentially noisy peak de-  
1900 tection.

## 1901 Appendix 6

### 1902 Visual field estimation

1903 Visual fields are calculated by casting rays and intersecting them with other individuals and  
1904 the focal individual (for self-occlusion). An example of this can be seen in Figure 3. The  
1905 following procedure requires posture for all individuals in a frame. In case an individual  
1906 does not have a valid posture in the given frame, its most recent posture and position are  
1907 used as an approximation. The field is internally represented as a discretized vector of  
1908 multi-dimensional pixel values. Depending on the resolution parameter ( $F_{\text{res}}$ ), which sets the  
1909 number of pixels, each index in the array represents step-sizes of  $(F_{\text{max}} - F_{\text{min}})/F_{\text{res}}$  radians.  
1910 The  $F$  values are constants setting the minimum and maximum field of view ( $-130^\circ$  to  $130^\circ$   
1911 by default, which gives a range of  $260^\circ$ ). Each pixel consists of multiple data-streams: The  
1912 distance to the other individual, the identity of the other individual and the body-part that  
1913 the ray intersected with.

1914 Eyes are simulated to be located on the outline of the focal individual, near the head.  
1915 The distance to the head can be set by the user as a percentage of midline-length. To find  
1916 the exact eye position, the program calculates intersections between vectors going left/right  
1917 from that midline point, perpendicular to the midline, and the individual's outline. In order  
1918 to be able to simulate different types of binocular and monocular sight, a parameter for eye  
1919 separation  $E_{\text{sep}}$  (radians) controls the offset from the head angle  $H_\alpha$  per eye. Left and right  
1920 eye are looking in directions  $H_\alpha - E_{\text{sep}}$  and  $H_\alpha + E_{\text{sep}}$ , respectively.

1921 We iterate through all available postures in a given frame and use a procedure which is  
1922 very similar to depth-maps (*Williams (1978)*) in e.g. OpenGL. In the case of 2D visual fields,  
1923 this depth-map is 1D. Each pixel holds a floating-point value (initialized to  $\infty$ ) which is  
1924 continuously compared to new samples for the same position – if the new sample is closer to  
1925 the "camera" than the reference value, the reference value is replaced. This way, after all  
1926 samples have been evaluated, we generate a map of the objects closest to the "camera" (in  
1927 this case the eye of the focal individual). For that to work we also have to keep the identity  
1928 in each of these discrete slots maintained. So each time a depth value is replaced, the same  
1929 goes for all the other data-streams (such as identity and head-position). When an existing  
1930 value is replaced, values in deeper layers of occlusion are pushed downwards alongside the  
1931 old value for the first layer.

1932 Position of the intersecting object's top-left corner is located at  $\hat{P}$ . Let  $E_e$  be the position  
1933 of each eye, relative to  $\hat{P}$ . For each point  $P_j$  (coordinates relative to  $\hat{P}$ ) of the outline, check  
1934 the distance between  $E_e$  and the outline segments  $(P_j - P_{j-1})$ . For each eye  $E_e$ :

- 1935 1. Project angles ranging from  $[\text{atan2}(P_{j-1} + E_e), \text{atan2}(P_j + E_e)]$ , where  $\alpha_e$  is the eye orien-  
1936 tation, using:

$$1937 \Gamma_e(\beta) = \text{angle\_normalize}(\beta - \alpha_e - F_{\text{min}}) / (F_{\text{max}} - F_{\text{min}}) * F_{\text{res}}$$

1938  $\text{angle\_normalize}(\beta)$  normalizes beta to be between  $[-\pi, \pi]$ .

- 1939 2. **if** either  $\max(R)$  or  $\min(R)$  is inside the visual field ( $0 \leq \Gamma_e(\beta) \leq 1$ ):

- 1940 (a) We call the first angle satisfying the condition  $\beta$ .
- 1941 (b) Then the search range becomes  $R := [\max\{\beta - 0.5, 0\}, \beta + 0.5]$ , where the ele-  
1942 ments in  $R$  are integers.
- 1943 (c) Let  $\delta_{j,e} = \|P_{j-1} - E_e\|$ , the distance between outline point at  $j - 1$  and the eye  
1944 (interpolation could be done here).
- 1945 (d) Let index  $k \in \mathbb{N}$ ,  $k \in R$  be our index into the first layer of the depth-map  $\text{depth}_0$ ;



1948 (e) **if**  $\text{depth}_0(k) > \delta_{j,e}$ : Calculate all properties  $D_0(k) := \{\text{head\_distance}, \dots \in \text{data\_streams}\}^T$ ,  
1949 and push values at  $k$  in layer 0 to layer 1.  
1950 (f) **otherwise**, if  $\text{depth}_1(k) > \delta_{j,e}$ , calculate properties for layer 1 instead and move  
1951 data from layer 1 further down, etc.

1952 The data-streams are calculated individually with the following equations:

- 1953 • **Distance**: Given already in  $\text{depth}_i(k)$ . In practice, values are cut off at the maximum  
1954 distance (size of the video squared) and normalized to  $[0, 255]$ .
- 1955 • **Identity**: Is assigned alongside  $\text{depth}_i(k)$  for each element that successfully replacing  
1956 another in the map.
- 1957 • **Body-part**: Let  $T_i = \text{tail index}$ ,  $L_{l/r} = \text{number of points in left/right side of the outline}$   
1958 (given by tail- and head-indexes):
  - 1959 1. **if**  $i > T_i$ :  $\text{head\_distance} = 1 - |i - T_i|/L_l$
  - 1960 2. **else**:  $\text{head\_distance} = 1 - |i - T_i|/L_r$

## 1961 Appendix 7

### 1962 The PV file format

1963 Since we are using a custom file format to save videos recorded using TGrabs (MP4 video can  
1964 be saved alongside PV for a limited time or frame-rate), the following is a short overview  
1965 of PV6 contents and structure. This description is purely technical and concise. It is mainly  
1966 intended for users who wish to implement a loader for the file format (e.g. in Python) or are  
1967 curious.

### 1968 Structure

1969 Generally, the file is built as a header (containing meta information on the video) followed  
1970 by a long data section and an index table plus a settings string at the end. The header at  
1971 the start of the file can be read as follows:

- 1972 1. version (string): "PV6"
- 1973 2. channels (uint8): Hard-coded to 1
- 1974 3. width & height (uint16): Video size
- 1975 4. crop offsets (4x uint16): Offsets from original image
- 1976 5. size of HorizontalLine struct (uchar)
- 1977 6. # frames (uint32)
- 1978 7. index offset (uint64): Byte offset pointing to the index table for
- 1979 8. timestamp (uint64): time since 1970 in microseconds of recording (or conversion time  
1980 if unavailable)
- 1981 9. empty string
- 1982 10. background image (byte\*): An array of uint8 values of size width \* height \* channels.
- 1983 11. mask image size (uint64): 0 if no mask image was used, otherwise size in bytes fol-  
1984 lowed by a byte\* array of that size

1985 Followed by the data section, where information is saved per frame. This information  
1986 can either be in a zip-compressed format, or raw (determined by size), see below:

- 1987 1. compression flag (uint8): 1 if compression was used, 0 otherwise
- 1988 2. if compressed:
  - 1989 (a) original size (uint32)
  - 1990 (b) compressed size (uint32)
  - 1991 (c) lzo1x compressed data (byte\*) in the format of the uncompressed variant (below)
- 1992 3. if uncompressed:
  - 1993 (a) timestamp since start time in header (uint32)
  - 1994 (b) number of images in frame (uint16)
  - 1995 (c) for each image in frame:
    - 1996 i. number of HorizontalLines (uint16)
    - 1997 ii. data of HorizontalLine (byte\*)
    - 1998 iii. pixel data for each pixel in the previous array (byte\*)

1999 Files are concluded by the index table, which gives a byte offset for each video frame  
2000 in the file, and a settings string. This index is used for quick frame skipping in TRex as well  
2001 as random access. It consists of exactly one uint64 index per video frame (as determined  
2002 by the number of video frames read earlier). After that map ends, a string follows, which  
2003 contains a JSON style string of all metadata associated by the user (or program) with the  
2004 video (such as species or size of the tank).

## 2005 Appendix 8

### 2006 Automatic visual recognition

#### 2007 Network layout and training procedure

2008 Network layout is sketched in Figure 1c. Using version 2.2.4 of Keras<sup>a</sup>, weights of densely connected layers as well as convolutional layers are initialized using Xavier-initialization (**Glorot and Bengio (2010)**). Biases are used and initialized to 0. The default image size in TRex is 80×80, but can be changed to any size in order to retain more detail or improve computation speed.

2013 During training, we use the Adam optimizer (**Kingma and Ba (2014)**) to traverse the loss landscape, which is generated by categorical focal loss. *Categorical* focal loss is an adaptation of the original *binary* focal loss (**Lin et al. (2017)**) for multiple classes:

$$2018 \text{cFL}(j) = \sum_{c=1}^N -\alpha (1 - \mathbf{P}_{jc})^\gamma \mathbf{V}_{jc} \log(\mathbf{P}_{jc}),$$

2020 where  $\mathbf{P}_{jc}$  is the prediction vector component returned by the network for class  $c$  in image  $j$ .  $\mathbf{V}$  is a set of validation images, which remains the same throughout the training process. It comprises 25% of the images available per individual. Images are marked *globally* when becoming part of the validation dataset and are not used for training in the current or any of the following steps.

2025 After each epoch, predictions are generated by performing a forward-pass through the network layers. Returned are the softmax-activations  $\mathbf{P}_{jc}$  of the last layer for each image  $j$  in the validation dataset. Simply calculating the mean of

$$2030 \bar{A} = \frac{1}{M} \sum_{j \in [0, M]} \begin{cases} 1 & \text{if } \mathbf{P}_j = \mathbf{V}_j \\ 0 & \text{otherwise} \end{cases},$$

2032 gives the mean accuracy of the network.  $M$  is the number of images in the validation dataset, where  $\mathbf{V}_j$  are the expected probability vectors per image  $j$ . However, much more informative is the per-class (per-identity) accuracy of the network among the set of images  $i$  belonging to class  $c$ , which is

$$2038 I_c = \{j; \text{ where } \mathbf{V}_{jc} = 1, j \in [0, M]\},$$

2040 given that all vectors in  $\mathcal{V}$  are one-hot vectors – meaning the vector has length  $N$  with  $\mathbf{V}_{j\phi} = 0 \forall \phi \neq c$  and  $\mathbf{V}_{jc} = 1$ .

$$2043 A_c = \frac{1}{|I_c|} \sum_{j \in I_c} \begin{cases} 1 & \text{if } \mathbf{P}_j = \mathbf{V}_j \\ 0 & \text{otherwise} \end{cases}$$

2046 Another constant, across training units – not just across epochs, is the set of images used to calculate mean uniqueness  $\bar{U}$  (see Box 1, as well as Guiding the Training Process). Values generated in each epoch  $t$  of every training unit are kept in memory and used to calculate their derivative  $\bar{U}'(t)$ .

#### 2050 Stopping-criteria

2051 A training unit can be interrupted if one of the following conditions becomes true:

2052  
2054  
2053  
2055  
2056  
2057  
2058  
2059  
2060  
2061  
2062  
2063  
2064  
2065  
2066  
2067  
2068  
2069  
2071  
2070  
2072  
2073  
2074  
2077  
2078  
2079  
2080  
2081  
2082  
2083  
2084  
2085  
2086  
2087  
2088  
2089  
2090  
2091  
2092  
2093

1. Training commenced for at least  $t = 5$  epochs, but uniqueness value  $\bar{U}$  was never above

$$\bar{U}_{\text{best}}^2 > \bar{U}(t) \forall t$$

where  $\bar{U}_{\text{best}}$  is the best mean uniqueness currently achieved by any training unit (initialized with zero). This prevents to train on faulty segments after a first successful epoch.

2. The worst accuracy value per class has been "good enough" in the last three epochs:

$$\min_{c \in [0, N]} \{A_c\} \geq 0.97$$

3. The global uniqueness value has been plateauing for more than 10 epochs.

$$\sum_{k \in [t-10, t]} \bar{U}'(k) \leq 0.01$$

4. Overfitting: Change in loss is very low on average after more than 5 epochs. Mean loss is calculated as follows:

$$\text{cFL}_{\mu}(t) = \frac{1}{5} \sum_{k \in [t-6, t-1]} \text{cFL}(k)$$

Now if the difference between the current loss and the previous loss is below a threshold:

$$\lambda(t) = \lfloor \ln(\text{cFL}(t)) \rfloor - 1$$
$$\frac{1}{5} \sum_{k \in [t-5, t]} \max \left\{ \epsilon; \left| \text{cFL}(k) - \text{cFL}_{\mu}(k) \right| \right\} < 0.05 * 10^{\lambda(t)}$$

5. Maximum number of epochs has been reached. User-defined option limiting the amount of time that training can take per unit. By default this limit is set to 150 epochs.
6. Loss is zero. No further improvements are possible within the current training unit, so we terminate and continue with the next.

A high per-class accuracy over multiple consecutive epochs is usually an indication that everything that can be learned from the given data has already been learned. No further improvements should be expected from this point, unless the training data is extended by adding samples from a different part of the video. The same applies to scenarios with consistently zero or very low change in loss. Even if improvements are still possible, they are more likely to happen during the final (overfitting) step where all of the data is combined.

<sup>a</sup>See [keras.io](https://keras.io) documentation for default arguments

## 2094 Appendix 9

### 2095 **Data used in this paper and reproducibility**

2096 All of the data, as well as the figures and tables showing the data, have been generated  
2097 automatically. We provide the scripts that have been used, as well as the videos if requested.  
2098 "Data" refers to converted video-files, as well as log- and NPZ-files. Analysis has been done  
2099 in Python notebooks, using mostly `matplotlib` and `pandas`, as well as `numpy` to load the data.  
2100 Since `TREx` and `TGrabs`, as well as `idtracker.ai` have been run on a Linux system, we were  
2101 able to run everything from two separate `bash` files:

- 2102 1. `run.bash`
- 2103 2. `run_idtracker.bash`

2104 Where (1) encompasses all trials run using `TREx` and `TGrabs`, both for the speed- and  
2105 recognition-datasets. (2) runs `idtracker.ai` in its own dedicated Python environment, using  
2106 only the recognition-dataset. The parameters we picked for `idtracker.ai` vary between  
2107 videos and are hand-crafted, saved in individual `.json` files (see Table A1 for a list of settings  
2108 used). We ran multiple trials for each combination of tools and data with  $N = 5$  where  
2109 necessary:

- 2110 • 3x `TGrabs` [speed-dataset]
- 2111 • 5x `TREx` + recognition [recognition-dataset]
- 2112 • 3x `idtracker.ai` [recognition-dataset]
- 2113 • `TREx` without recognition enabled [speed-dataset]:
  - 2114 - 3x for testing the tree-based, approximate and Hungarian methods (Tracking),
  - 2115 without posture enabled – testing raw speeds (see Table A3)
  - 2116 - 3x testing accuracy of basic tracking (see Table A2), with posture enabled

2117 A Python script used for Figure 7, which is run only once. It generates a series of results  
2118 for the same video (Video 7 with 100 individuals) with different sample-sizes. It uses a single  
2119 set of training samples and then – after equalizing the numbers of images per individual –  
2120 generates multiple virtual subsets with fewer images. They span 15 different sample-sizes  
2121 per individual, saving a history of accuracies for each run. We repeated the same procedure  
2122 with for the different normalization methods (no normalization, moments and posture),  
2123 each repeated five times.

2124 As described in the main text, we recorded memory usage with an external tool (`syrupy`)  
2125 and used it to measure both software solutions. This tool saves a log-file for each run, which  
2126 is appropriately renamed and stored alongside the other files of that trial.

2127 All runs of `TREx` are preceded by running a series of `TGrabs` commands first, in order  
2128 to convert the videos in the datasets. We chose to keep these trials separately and `load`  
2129 whenever possible, to avoid data-duplication. Since subsequent results of `TGrabs` are always  
2130 identical (with the exception of timings), we only keep one version of the `PV` files (The `PV`  
2131 file format) as well as only one version of the `results` files generated using live-tracking.  
2132 However, multiple runs of `TGrabs` were recorded in the form of log-files to get a measure of  
2133 variance between runs in terms of speed and memory.

### 2134 **Human validation**

To ensure that results from the automatic evaluation (in Visual Identification: Accuracy)  
are plausible, we manually reviewed part of the data. Specifically, the table in 3 shows  
an overview of the individual events reviewed and percentages of wrongly assigned frames.

**Appendix 9 Table A1.** Settings used for `idtracker.ai` trials, as saved inside the `.json` files used for tracking. The minimum intensity was always set to 0 and background subtraction was always enabled. An ROI is an area of interest in the form of an array of 2D vectors, typically a convex polygon containing the area of the tank (e.g. for fish or locusts). Since this format is quite lengthy, we only indicate here whether we limited the area of interest or not.

| video | length (# frames) | nblobs | area        | max. intensity | roi |
|-------|-------------------|--------|-------------|----------------|-----|
| 7     | 1921              | 100    | [165, 1500] | 170            | Yes |
| 8     | 30626             | 59     | [100, 2500] | 160            | Yes |
| 11    | 19539             | 10     | [200, 1500] | 10             | Yes |
| 13    | 19317             | 10     | [200, 1500] | 10             | Yes |
| 12    | 19309             | 10     | [200, 1500] | 10             | Yes |
| 9     | 90001             | 8      | [190, 4000] | 147            | Yes |
| 16    | 416259            | 8      | [200, 2500] | 50             | No  |
| 14    | 351677            | 8      | [200, 2500] | 50             | No  |
| 15    | 108000            | 8      | [250, 2500] | 10             | No  |

2135

2136

2137

2138

2139

2140

2141

2142

2143

2144

2145

2146

2147

2148

Due to the length of videos and the numbers of individuals inside the videos we did not review all videos in their entirety, as shown in the table. Using the reviewing tools integrated in TRex, we focused on crossings that were automatically detected. These tools allow the user to jump directly to points in the video that it deems problematic. Detecting problematic situations is equivalent to detecting the end of individual segments (see Automatic Visual Identification Based on Machine Learning). While iterating through these situations, we corrected individuals that have been assigned to the wrong object, generating a clean and corrected baseline dataset. We assumed that an assignment is correct, as long as the individual is at least part of the object that the identity has been assigned to. Misassignments were typically fixed after a few frames. Identities always returned to the correct individuals afterward (thus not causing a chain of follow-up errors).

2149

2150

2151

2152

2153

2154

2155

2156

2157

2158

2159

2160

2161

### Comparison between trajectories from different softwares, or multiple runs of the same software

In our tests, the same individuals may have been given different IDs (or "names") by each software (and in each run of each software for the same video), so, as a first step in every test where this was relevant, we had to determine the optimal pairing between identities of two datasets we wished to compare. This was done using a square distance matrix containing overall euclidean distances between identities is calculated by summing their per-frame distances. Optimally this number would be zero for one and greater than zero for every other pairing, but temporary tracking mistakes and differences in the calculation of centroids may introduce noise. Thus, we solved the matching problem (see Matching an object to an object in the next frame) for identities between each two datasets and paired individuals with the smallest accumulative distance between them. This was done for all results presented, where a direct comparison between two datasets was required.



## 2162 Appendix 10

### 2163 Matching probabilities

2164 One of the most important steps, when matching objects in one frame with objects in the  
 2165 next frame, is to calculate a numerical landscape that can then be traversed by a maximiza-  
 2166 tion algorithm to find the optimal combination. This landscape, which can be expressed  
 2167 as an  $m \times n$  matrix  $\mathbf{P}(t)$ , contains the probability values between  $[0, 1]$  for each assignment  
 2168 between individuals  $i$  and objects  $B_j$ .

2169 Below are definitions used in the following text:

- 2170 •  $T_\Delta$  is the typical time between frames (s), which depends on the video
- 2171 •  $\tau_i < t$  is most recent frame assigned to individual  $i$  previous to the current frame  $t$
- 2172 •  $P_{\min}$  is the minimally allowed probability for the matching algorithm, underneath which  
 2173 the probabilities are assumed to be zero (and respective combination of object and  
 2174 individual is ignored). This value is set to 0.1 by default.
- 2175 •  $F(t \in \mathbb{R}) \rightarrow \mathbb{N}$  is the frame number associated with the time  $t$  (s)
- 2176 •  $\mathcal{T}(f \in \mathbb{N}) \rightarrow \mathbb{R}$  is the time in seconds of frame  $f$ , with  $F(\mathcal{T}(f)) = f$
- 2177 •  $\mathbf{x}$  indicates that  $x$  is a vector
- 2178 •  $\mathbf{U}(\mathbf{x}) = \mathbf{x} / \|\mathbf{x}\|$

2179 Some values necessary for the following calculations are independent of the objects in  
 2180 the current frame and merely depend on data from previous frames. They can be re-used  
 2181 per frame and individual in the spirit of dynamic programming, reducing computational  
 2182 complexity in later steps:

$$2183 \mathbf{v}_i(t) = \mathbf{p}'_i(t) = \frac{\delta}{\delta t} \mathbf{p}_i(t)$$

$$2184 \hat{\mathbf{v}}_i(t) = \mathbf{v}_i(t) * \begin{cases} 1 & \text{if } \|\mathbf{v}_i(t)\| \leq D_{\max} \\ D_{\max} / \|\mathbf{v}_i(t)\| & \text{otherwise} \end{cases}$$

$$2185 \mathbf{a}_i(t) = \frac{\delta}{\delta t} \hat{\mathbf{v}}_i(t)$$

2186 Velocity  $\mathbf{v}_i(t)$  and acceleration  $\mathbf{a}_i(t)$  are simply the first and second derivatives of the indi-  
 2187 viduals position at time  $t$ .  $\hat{\mathbf{v}}_i(t)$  is almost the same as the raw velocity, but its length is limited  
 2188 to the maximally allowed travel distance per second ( $D_{\max}$ , parameter `track_max_speed`).

2189 These are then further processed, combining and smoothing across values of multiple  
 2190 previous frames (the last 5 valid ones). Here,  $\bar{f}(x)$  indicates that the resulting value uses  
 2191 data from multiple frames.

$$2192 \bar{s}_i(t) = \text{median}_{k \in [F(t)-5, F(t)]} \|\hat{\mathbf{v}}_i(\mathcal{T}(k))\|$$

2193 is the speed at which the individual has travelled at recently. The mean direction of  
 2194 movement is expressed as

$$2195 \bar{\mathbf{d}}_i(t) = \frac{1}{F(t) - F(\tau) + 5} \sum_{k \in [F(\tau)-5, F(t)]} \hat{\mathbf{v}}_i(\mathcal{T}(k))$$

2196 with the corresponding direction of acceleration

$$2197 \bar{\mathbf{a}}_i(t) = \mathbf{U} \left( \frac{1}{F(t) - F(\tau) + 5} \sum_{k \in [F(\tau)-5, F(t)]} \mathbf{a}_i(\mathcal{T}(k)) \right).$$

2215  
2214  
2216  
2217  
2218  
2220  
2219  
2221  
2222  
2223  
2224  
2225  
2226  
2227  
2228  
2229  
2230  
2231  
2232  
2233  
2234  
2235  
2236  
2237  
2238  
2239  
2240  
2241  
2242  
2243  
2244  
2245  
2246  
2247  
2248  
2249  
2250  
2251  
2252  
2253  
2254  
2255  
2256  
2257  
2258  
2259  
2260  
2261  
2262  
2263  
2264

The predicted position for individual  $i$  at time  $t$  is calculated as follows:

$$\hat{\mathbf{p}}_i(t) = s_i(t) \sum_{k \in [F(\tau_i), F(t)-1]} w(k) (\bar{\mathbf{d}}_i(t) + \mathcal{T}'(k) * \bar{\mathbf{a}}_i(t)),$$

with weights for each considered time-step of

$$w(f) = \frac{1 + \lambda^4}{1 + \lambda^4 \max\{1, f - F(\tau_i) + 1\}},$$

where  $\lambda \in [0, 1]$  is a decay rate (parameter `track_speed_decay`) at which the impact of previous positions on the predicted position decreases with distance in time. With its value approaching 1, the resulting curve becomes steeper - giving less weight previous positions the farther away they are from the focal frame.

In order to locate an individual  $i$  in the current frame  $F(t)$ , a probability is calculated for each object  $B_j$  found in the current frame resulting in the matrix:

$$\mathbf{P}(t) = \begin{bmatrix} P_0(t | B_0) & \dots & P_n(t | B_0) \\ \vdots & \ddots & \vdots \\ P_0(t | B_m) & \dots & P_n(t | B_m) \end{bmatrix}. \quad (3)$$

Probabilities  $P_i(t | B_j)$  for all potential connections between blobs  $B_j$  and identities  $i$  at time  $t$  are calculated by first predicting the expected position  $\hat{\mathbf{p}}_i(t)$  for each individual in the current frame  $F(t)$ . This allows the program to focus on a small region of where the individual is expected to be located, instead of having to search the whole arena each time.

Based on the individual's recent speed  $\bar{s}_i(t)$ , direction  $\bar{\mathbf{d}}_i(t)$ , acceleration  $\bar{\mathbf{a}}_i(t)$  and angular momentum  $\bar{\alpha}'_i(t)$ , the individual's projected position  $\hat{\mathbf{p}}_i(t)$  is usually not far away from its last seen location for small time-steps. Only when  $\Delta t$  increases, if the individual has been lost for more than one frame or frame-rates are low, does it really play a role.

The actual probability values in  $\mathbf{P}(t)$  are then calculated by combining three metrics - each describing different aspects of potential concatenation of object  $b$  at time  $t$  to the already existing track for individual  $i$ :

The time metric  $T_i(t)$ , which does not depend on the blob the individual is trying to be matched to. It merely reflects the recency of the individuals last occurrence in a way that recently seen individual will always be preferred over individuals that have been lost for longer.

$$F_{\min} = \min \left\{ \frac{1}{T_{\Delta}}, 5 \right\}$$

$$R_i(t) = \left\| \left\{ \mathcal{T}(k) \mid F(t) - T_{\Delta}^{-1} \leq k \leq t \wedge \mathcal{T}(k) - \mathcal{T}(k-1) \leq T_{\max} \right\} \right\|$$

$$T_i(t) = \left( 1 - \min \left\{ 1, \frac{\max\{0, \tau_i - t - T_{\Delta}\}}{T_{\max}} \right\} \right) * \begin{cases} \min \left\{ 1, \frac{R_i(\tau_i) - 1}{F_{\min}} + P_{\min} \right\} & F(\tau_i) \geq F(t_0) + F_{\min} \\ 1 & \text{otherwise} \end{cases} \quad (4)$$

$S_i(t | B_j)$  is the speed that it would take to travel from the individuals position to the blobs position in the given time (which might be longer than one frame), inverted and normalized to a value between 0 and 1.

$$S_i(t | B_j) = \left( 1 + \frac{\left\| (\mathbf{p}_{B_j}(t) - \hat{\mathbf{p}}_i(t)) / (\tau_i - t) \right\|}{D_{\max}} \right)^{-2} \quad (5)$$

2266

2267

2268

2269

2270

2271

2272

2273

2274

2275

2276

2277

2278

2279

2280

2281

2282

2283

2284

2285

2286

2287

2288

And the angular difference metric  $A_i(t, \tau_i | B_j)$ , describing how close in angle the resulting vector of connecting blob and individual to a track would be to the previous direction vector:

$$\mathbf{a} = \dot{\mathbf{p}}_i(t) - \mathbf{p}_i(\tau_i)$$

$$\mathbf{b} = \mathbf{p}_{B_j}(t) - \mathbf{p}_i(\tau_i)$$

$$A_i(t, \tau_i | B_j) = \begin{cases} 1 - \frac{1}{\pi} |\text{atan2} \{ \|\mathbf{a} \times \mathbf{b}\|, \mathbf{a} \cdot \mathbf{b} \}| & \text{if } \|\mathbf{a}\| > 1 \wedge \|\mathbf{b}\| > 1 \\ 1 & \text{otherwise} \end{cases} \quad (6)$$

The conditional ensures that the individual travelled a long enough distance, as the atan2 function used to determine angular difference here lacks numerical precision for very small magnitudes. This is, however, an unproblematic case in this situation as the positions are in pixel-coordinates and anything below a movement of one pixel is likely to be due to noise anyway.

Combining (4), (5) and (6) into a weighted probability product yields:

$$P_i(t, \tau_i | B_j) = S_i(t | B_j) * (1 - \omega_1 (1 + A_i(t, \tau_i | B_j))) * (1 - \omega_2 (1 + T_i(t, \tau_i))) \quad (7)$$

Results from equation (7) can now easily be used in a matching algorithm, in order to determine the best combination of objects and individuals as in Matching an object to an object in the next frame.  $\omega_1$  is usually set to 0.1,  $\omega_2$  is set to 0.25 by default.

## 2289 Appendix 11

```
2290 Algorithm for splitting touching individuals
2291 Data: image of a blob,  $N_e$  number of expected blobs
2292 Result:  $N \geq N_e$  smaller image-segments, or error
2293 threshold =  $T_c$ ;
2294 while threshold < 255 do
2295     blobs = apply_threshold(image, threshold);
2296     if ||blobs|| = 0 then
2297         break;
2298     end
2299     if ||blobs||  $\geq N_e$  then
2300         sort blobs by size in decreasing fashion;
2301         loop through all blobs  $i$  up to  $i \leq N_e$  and detect whether the size-ratio
2302         between them is roughly even. until then, we keep iterating.;
2303         if min{ratio,  $\forall i \in [0, N_e]$ } < 0.3 then
2304             threshold = threshold + 1;
2305             continue;
2306         else
2307             return blobs;
2308         end
2309     else
2310         threshold = threshold + 1;
2311     end
2312 end
2313 return fail;
```

**Algorithm 2:** The algorithm used whenever two individuals touch, which is detected by a history-based method. This history-based method also provides  $N_e$ , the number of expected objects within the current (big) object.  $T_c$  is the starting threshold constant parameter, as set by the user.
